# Supplementary material
Source: MDPI journal article supplement (https://www.mdpi.com/2077-1312/8/4/240)
Supplement: s1 [file s1]

Archive with 4 entries (4 files):
- 2CC3738173BA4370B7B3BB4233F87EA3.xsl
- C5AD2E49D4E24279B574967D7FB71A8A.xsl
- A19535DEF2E44A69AD09E3407678C29A.xsl
- doc.kml
