# Supplementary material
Source: MDPI journal article supplement (https://www.mdpi.com/2077-1312/8/4/240)
Supplement: s1 [file s1 › doc.kml]

<?xml version="1.0" encoding="UTF-8"?>
<kml xmlns="http://www.opengis.net/kml/2.2" xmlns:gx="http://www.google.com/kml/ext/2.2" xmlns:xsi="http://www.w3.org/2001/XMLSchema-instance"
 xsi:schemaLocation="http://www.opengis.net/kml/2.2 http://schemas.opengis.net/kml/2.2.0/ogckml22.xsd http://www.google.com/kml/ext/2.2 http://code.google.com/apis/kml/schema/kml22gx.xsd">
<Document id="Layers">
  <name>Layers</name>
  <Snippet></Snippet>
  <Style id="LineStyle00">
    <LabelStyle>
      <color>00000000</color>
      <scale>0.000000</scale>
    </LabelStyle>
    <LineStyle>
      <color>ff78a65b</color>
      <width>1.000000</width>
    </LineStyle>
    <PolyStyle>
      <color>00000000</color>
      <outline>0</outline>
    </PolyStyle>
  </Style>
  <Style id="LineStyle01">
    <LabelStyle>
      <color>00000000</color>
      <scale>0.000000</scale>
    </LabelStyle>
    <LineStyle>
      <color>ffe854bb</color>
      <width>1.000000</width>
    </LineStyle>
    <PolyStyle>
      <color>00000000</color>
      <outline>0</outline>
    </PolyStyle>
  </Style>
  <Style id="LineStyle02">
    <LabelStyle>
      <color>00000000</color>
      <scale>0.000000</scale>
    </LabelStyle>
    <LineStyle>
      <color>ff5e7ff7</color>
      <width>1.000000</width>
    </LineStyle>
    <PolyStyle>
      <color>00000000</color>
      <outline>0</outline>
    </PolyStyle>
  </Style>
  <Style id="LineStyle03">
    <LabelStyle>
      <color>00000000</color>
      <scale>0.000000</scale>
    </LabelStyle>
    <LineStyle>
      <color>ff965b3f</color>
      <width>1.000000</width>
    </LineStyle>
    <PolyStyle>
      <color>00000000</color>
      <outline>0</outline>
    </PolyStyle>
  </Style>
  <Style id="LineStyle04">
    <LabelStyle>
      <color>00000000</color>
      <scale>0.000000</scale>
    </LabelStyle>
    <LineStyle>
      <color>ff6afa5a</color>
      <width>1.000000</width>
    </LineStyle>
    <PolyStyle>
      <color>00000000</color>
      <outline>0</outline>
    </PolyStyle>
  </Style>
  <Style id="LineStyle05">
    <LabelStyle>
      <color>00000000</color>
      <scale>0.000000</scale>
    </LabelStyle>
    <LineStyle>
      <color>ff75f8fa</color>
      <width>1.000000</width>
    </LineStyle>
    <PolyStyle>
      <color>00000000</color>
      <outline>0</outline>
    </PolyStyle>
  </Style>
  <Style id="LineStyle06">
    <LabelStyle>
      <color>00000000</color>
      <scale>0.000000</scale>
    </LabelStyle>
    <LineStyle>
      <color>ffca96f2</color>
      <width>1.000000</width>
    </LineStyle>
    <PolyStyle>
      <color>00000000</color>
      <outline>0</outline>
    </PolyStyle>
  </Style>
  <Style id="LineStyle07">
    <LabelStyle>
      <color>00000000</color>
      <scale>0.000000</scale>
    </LabelStyle>
    <LineStyle>
      <color>fff7d78b</color>
      <width>1.000000</width>
    </LineStyle>
    <PolyStyle>
      <color>00000000</color>
      <outline>0</outline>
    </PolyStyle>
  </Style>
  <Style id="LineStyle08">
    <LabelStyle>
      <color>00000000</color>
      <scale>0.000000</scale>
    </LabelStyle>
    <LineStyle>
      <color>ff6c90a6</color>
      <width>1.000000</width>
    </LineStyle>
    <PolyStyle>
      <color>00000000</color>
      <outline>0</outline>
    </PolyStyle>
  </Style>
  <Style id="LineStyle09">
    <LabelStyle>
      <color>00000000</color>
      <scale>0.000000</scale>
    </LabelStyle>
    <LineStyle>
      <color>ff3c3d80</color>
      <width>1.000000</width>
    </LineStyle>
    <PolyStyle>
      <color>00000000</color>
      <outline>0</outline>
    </PolyStyle>
  </Style>
  <Style id="LineStyle010">
    <LabelStyle>
      <color>00000000</color>
      <scale>0.000000</scale>
    </LabelStyle>
    <LineStyle>
      <color>ff3cab6c</color>
      <width>1.000000</width>
    </LineStyle>
    <PolyStyle>
      <color>00000000</color>
      <outline>0</outline>
    </PolyStyle>
  </Style>
  <Style id="LineStyle012">
    <LabelStyle>
      <color>00000000</color>
      <scale>0.000000</scale>
    </LabelStyle>
    <LineStyle>
      <color>ff803a94</color>
      <width>1.000000</width>
    </LineStyle>
    <PolyStyle>
      <color>00000000</color>
      <outline>0</outline>
    </PolyStyle>
  </Style>
  <Style id="LineStyle013">
    <LabelStyle>
      <color>00000000</color>
      <scale>0.000000</scale>
    </LabelStyle>
    <LineStyle>
      <color>fff26d66</color>
      <width>1.000000</width>
    </LineStyle>
    <PolyStyle>
      <color>00000000</color>
      <outline>0</outline>
    </PolyStyle>
  </Style>
  <Style id="LineStyle014">
    <LabelStyle>
      <color>00000000</color>
      <scale>0.000000</scale>
    </LabelStyle>
    <LineStyle>
      <color>ff69b9fa</color>
      <width>1.000000</width>
    </LineStyle>
    <PolyStyle>
      <color>00000000</color>
      <outline>0</outline>
    </PolyStyle>
  </Style>
  <Style id="LineStyle10">
    <LabelStyle>
      <color>00000000</color>
      <scale>0.000000</scale>
    </LabelStyle>
    <LineStyle>
      <color>ff000000</color>
      <width>1.000000</width>
    </LineStyle>
    <PolyStyle>
      <color>00000000</color>
      <outline>0</outline>
    </PolyStyle>
  </Style>
  <Style id="LineStyle20">
    <LabelStyle>
      <color>00000000</color>
      <scale>0.000000</scale>
    </LabelStyle>
    <LineStyle>
      <color>ffffffff</color>
      <width>3.400000</width>
    </LineStyle>
    <PolyStyle>
      <color>00000000</color>
      <outline>0</outline>
    </PolyStyle>
  </Style>
  <Folder id="FeatureLayer0">
    <name>Shoreline</name>
    <Snippet></Snippet>
    <Placemark id="ID_00000">
      <name>1956</name>
      <Snippet></Snippet>
      <description><![CDATA[<html xmlns:fo="http://www.w3.org/1999/XSL/Format" xmlns:msxsl="urn:schemas-microsoft-com:xslt">

<head>

<META http-equiv="Content-Type" content="text/html">

<meta http-equiv="content-type" content="text/html; charset=UTF-8">

</head>

<body style="margin:0px 0px 0px 0px;overflow:auto;background:#FFFFFF;">

<table style="font-family:Arial,Verdana,Times;font-size:12px;text-align:left;width:100%;border-collapse:collapse;padding:3px 3px 3px 3px">

<tr style="text-align:center;font-weight:bold;background:#9CBCE2">

<td>1956</td>

</tr>

<tr>

<td>

<table style="font-family:Arial,Verdana,Times;font-size:12px;text-align:left;width:100%;border-spacing:0px; padding:3px 3px 3px 3px">

<tr>

<td>YEAR</td>

<td>1956</td>

</tr>

</table>

</td>

</tr>

</table>

</body>

</html>

]]></description>
      <styleUrl>#LineStyle00</styleUrl>
      <MultiGeometry>
        <LineString>
          <extrude>0</extrude>
          <tessellate>1</tessellate><altitudeMode>clampToGround</altitudeMode>
          <coordinates> -0.2203695639757305,39.18098075770865,0 -0.2204072103798851,39.18107461766004,0 -0.2205503620677924,39.18128898422761,0 -0.2208561220547066,39.18145717761271,0 -0.2211105340088764,39.18159235492817,0 -0.2213790915039433,39.18170921180668,0 -0.2216828506558494,39.18179148229445,0 -0.2219987826962306,39.18183841306124,0 -0.2223493482084347,39.18184282819804,0 -0.2226981004854922,39.18181219126419,0 -0.2230939658772357,39.18174361695763,0 -0.2234809270318734,39.18164851479883,0 -0.2238066573753524,39.18156022967824,0 -0.2241225962541038,39.18145286443022,0 -0.224474541989513,39.18128927610926,0 -0.2247982649457208,39.18109355214234,0 -0.2249843360984383,39.18090126545503,0 -0.2252113356218463,39.18075300479653,0 -0.2255082076169403,39.18091382295808,0 -0.2256087110527801,39.18104493283565,0 -0.2256972247350676,39.18124726618898,0 -0.2260897249192828,39.18124835752573,0 -0.2264783534966792,39.18112643391579,0 -0.2268195336283714,39.18101752740169,0 -0.2271492329345518,39.18088855744621,0 -0.2275179913160447,39.18074819779965,0 -0.2278599136485308,39.18057296590309,0 -0.2281830109164672,39.18028091828032,0 -0.2284569418432743,39.18010179750428,0 -0.2287329669875516,39.17992454841295,0 -0.2289934387855418,39.17973226645724,0 -0.2292011140734131,39.17950663858995,0 -0.2291062323496328,39.17910419934943,0 -0.2290784174189942,39.17873202161984,0 -0.2292888857458358,39.17873405089033,0 -0.2294318759912361,39.1789916549005,0 -0.2295201453786295,39.17927884744223,0 -0.2297241861863052,39.17944459641023,0 -0.2302475417052413,39.17957026876185,0 -0.2305948309849897,39.17961323018844,0 -0.230946162742735,39.1796196608942,0 -0.2313963325408746,39.17956183680312,0 -0.2318151730609603,39.17961946789318,0 -0.2321997074478505,39.17965744429877,0 -0.2325859976601688,39.17968248379424,0 -0.2330239493667821,39.17970257949128,0 -0.2334621921962838,39.17969436716422,0 -0.2339319309201455,39.17963653243278,0 -0.2343838694469426,39.17952259413885,0 -0.2346545615853598,39.17940506039457,0 -0.2349142892511961,39.17927299365934,0 -0.2353582410053477,39.1790511112962,0 -0.235786081001683,39.17881100969448,0 -0.236187037903073,39.17854343251558,0 -0.2364960561497014,39.17834455244524,0 -0.2367925845660571,39.17813471123574,0 -0.2370618551999624,39.17786874895131,0 -0.2373302386338368,39.17760221631376,0 -0.2376437628296955,39.17738044825247,0 -0.2379674153722822,39.1771674240201,0 -0.2382825845689227,39.17693951666038,0 -0.2384187035497471,39.17673408341744,0 -0.2385400768735908,39.17652253095794,0 -0.238827790788864,39.17621352367247,0 -0.2389302220682489,39.17600659902437,0 -0.239016436165123,39.17579490417484,0 -0.2391282011540695,39.17558004844545,0 -0.2393401200769977,39.17525136521427,0 -0.2394974029247726,39.1749861858805,0 -0.2396405027140751,39.17471621245083,0 -0.2397549421698825,39.17444837742222,0 -0.2398643932082075,39.17417924564214,0 -0.2400323452463385,39.17384196567176,0 -0.2401894776955127,39.17350165872999,0 -0.2402914017775476,39.17316416378286,0 -0.2403767641926756,39.17282378523601,0 -0.2404661396244248,39.17249867189067,0 -0.240547703219264,39.172172339098,0 -0.2406145153116701,39.17183425581297,0 -0.2406860619763263,39.17152288181382,0 -0.2407613383723926,39.17121203396619,0 -0.2408221852655059,39.17095886454432,0 -0.2408806744373034,39.17070536173447,0 -0.2409614002834182,39.17030503699134,0 -0.2410029361299455,39.17002594513094,0 -0.2410307474807135,39.16975994420608,0 -0.2410581880348538,39.16949391826115,0 -0.2411088882284349,39.16918228506336,0 -0.2411591128184948,39.16887060722383,0 -0.2411825509906614,39.16853775698456,0 -0.2412195540996023,39.16820581548557,0 -0.2412984949485053,39.16790973310736,0 -0.241360756834571,39.1675703494255,0 -0.2413947467075609,39.16726846331082,0 -0.2413966483095105,39.1669655593469,0 -0.2413442362244812,39.16662226705097,0 -0.241368394164607,39.16619803413071,0 -0.241432442936357,39.16577578581412,0 -0.2414919945176393,39.16539632439665,0 -0.2415234144083066,39.16501517941227,0 -0.2414723109407332,39.16459921841496,0 -0.2414315734913732,39.16436094721417,0 -0.2414297467566234,39.16412148426295,0 -0.2414850222378394,39.16396070699808,0 -0.2415336454995925,39.16365675381304,0 -0.2415001269161374,39.16341759776129,0 -0.24147219354146,39.16303555478276,0 -0.241440129817659,39.1627158731386,0 -0.2414237236751696,39.16239559482578,0 -0.2414659718638303,39.16204417905783,0 -0.2415185266430599,39.16169347766529,0 -0.2415568683761447,39.16138457452143,0 -0.2415426796159409,39.16107549819672,0 -0.2413729652456068,39.16071750903691,0 -0.2413528205119137,39.16049792276581,0 -0.2413626085445223,39.16027748431782,0 -0.2413786455374997,39.15998467795371,0 -0.2412975088854248,39.15959303213202,0 -0.2412177491791082,39.15928365459346,0 -0.2411870067003738,39.15902338671876,0 -0.2411508173496529,39.15876362942657,0 -0.2410605803228807,39.15851164297849,0 -0.240959166231737,39.15826210245061,0 -0.2408677225616635,39.15799519092162,0 -0.2407918551111543,39.15772539703879,0 -0.2407319889982902,39.15737716000209,0 -0.2407418672201481,39.15715568133194,0 -0.2407630673619701,39.1569345411833,0 -0.2407679941698642,39.15657353845449,0 -0.2405474059306459,39.15622506874654,0 -0.240458358237386,39.15580105652777,0 -0.2405458699372438,39.15544200978587,0 -0.2405139329910043,39.15520169796613,0 -0.2404888631649558,39.1549745992622,0 -0.2404811988100334,39.15474684091796,0 -0.2405214324055566,39.15442242866626,0 -0.2403692523542163,39.15408630654747,0 -0.2404053177863576,39.15375106854454,0 -0.2403754762103459,39.15345717493614,0 -0.2403762136788588,39.1532033355399,0 -0.2403177484436837,39.15281937740325,0 -0.2403551897672982,39.152566407749,0 -0.2403069973702286,39.15227207923383,0 -0.2402076417253966,39.15199441567573,0</coordinates>
        </LineString>
      </MultiGeometry>
    </Placemark>
    <Placemark id="ID_00001">
      <name>1977</name>
      <Snippet></Snippet>
      <description><![CDATA[<html xmlns:fo="http://www.w3.org/1999/XSL/Format" xmlns:msxsl="urn:schemas-microsoft-com:xslt">

<head>

<META http-equiv="Content-Type" content="text/html">

<meta http-equiv="content-type" content="text/html; charset=UTF-8">

</head>

<body style="margin:0px 0px 0px 0px;overflow:auto;background:#FFFFFF;">

<table style="font-family:Arial,Verdana,Times;font-size:12px;text-align:left;width:100%;border-collapse:collapse;padding:3px 3px 3px 3px">

<tr style="text-align:center;font-weight:bold;background:#9CBCE2">

<td>1977</td>

</tr>

<tr>

<td>

<table style="font-family:Arial,Verdana,Times;font-size:12px;text-align:left;width:100%;border-spacing:0px; padding:3px 3px 3px 3px">

<tr>

<td>YEAR</td>

<td>1977</td>

</tr>

</table>

</td>

</tr>

</table>

</body>

</html>

]]></description>
      <styleUrl>#LineStyle01</styleUrl>
      <MultiGeometry>
        <LineString>
          <extrude>0</extrude>
          <tessellate>1</tessellate><altitudeMode>clampToGround</altitudeMode>
          <coordinates> -0.2202609553320819,39.18101434282628,0 -0.2203261669492453,39.18114699834463,0 -0.2204482385271046,39.18123572341112,0 -0.220626812299772,39.18144497700129,0 -0.2208852228555333,39.1816489846911,0 -0.2210369549576974,39.1817622529074,0 -0.2211757334630438,39.18181562138827,0 -0.2215495528347641,39.18188889953775,0 -0.2217741003581791,39.18194193024767,0 -0.2220025524516728,39.18197360075009,0 -0.2221995046634269,39.18194969642074,0 -0.2225195040101873,39.18191204167973,0 -0.2228908983464981,39.18181363775924,0 -0.2232502393460176,39.1817101785633,0 -0.2237713128181521,39.18154383302149,0 -0.2241178833659584,39.18137570866509,0 -0.2243327890324078,39.18120682830245,0 -0.2245890350321767,39.18084347625024,0 -0.2246892608434067,39.18063133937274,0 -0.2247914182945595,39.1806814468816,0 -0.2249618266040405,39.18070934517971,0 -0.2250832180315272,39.1806597982718,0 -0.2252137878657072,39.18061047087125,0 -0.2253636210798794,39.1806164252886,0 -0.2257577023530712,39.1807974357055,0 -0.2260711388309957,39.18092646814088,0 -0.2262925336863548,39.18098179788083,0 -0.2264194205286766,39.18110400143883,0 -0.2266500897054193,39.18115716857051,0 -0.2268551872135495,39.18115966989635,0 -0.2272453397082078,39.18120710008797,0 -0.2273982333464282,39.18121312387907,0 -0.2274497821294361,39.18122627020141,0 -0.2275307405168761,39.18119244335153,0 -0.227768646368138,39.18098358293411,0 -0.2280572869372209,39.18073064017333,0 -0.2283431450746671,39.18047048003952,0 -0.2287239194429522,39.18028885424853,0 -0.2292113128839368,39.18012168236515,0 -0.229331406693581,39.18005827588089,0 -0.2293014752763069,39.17976157155253,0 -0.2292586201823577,39.17947875504542,0 -0.2294737234589849,39.17949150052053,0 -0.2296098043614649,39.17958245572322,0 -0.2299402084637544,39.17971617153538,0 -0.2303092766129488,39.17980122728373,0 -0.2305617720333701,39.17979769910049,0 -0.2307217740403547,39.1797786220036,0 -0.2307840905432161,39.17975150075408,0 -0.2307961259347812,39.17969458026001,0 -0.2308829939903741,39.17966613567955,0 -0.2308834974598106,39.17971572652574,0 -0.2308523291409692,39.1797607515487,0 -0.2308107840421957,39.18000765963403,0 -0.2308714338783941,39.18008537801621,0 -0.2310594235786074,39.18022714494381,0 -0.2313394782372128,39.180332963278,0 -0.2316529257417331,39.18039953018433,0 -0.2320165256244887,39.18043677797025,0 -0.2321998109367761,39.18044876202675,0 -0.232405874004809,39.18044221890067,0 -0.2325939062631987,39.18045812955334,0 -0.2327136242610391,39.18046669562444,0 -0.2328806729383141,39.18045541091274,0 -0.2331033477973528,39.18046260987898,0 -0.2332767116157027,39.18041524252111,0 -0.2334948636998844,39.18041279910592,0 -0.2335745200006533,39.18044329511113,0 -0.2336395654911272,39.18047153673272,0 -0.2340029777550585,39.1803886396605,0 -0.2343324940444012,39.18029540215272,0 -0.234692280492929,39.18017999900692,0 -0.2349454651895976,39.1800963872974,0 -0.2351798142188384,39.17999325943856,0 -0.2355600170123674,39.17979443538325,0 -0.2359290991274415,39.17956674266371,0 -0.2360942507968514,39.17941620387445,0 -0.2363373739362842,39.17921412315722,0 -0.236597927698789,39.17900482862431,0 -0.2368096962052383,39.17877435246582,0 -0.2368554907981611,39.17873110350619,0 -0.2371768254345866,39.17845555407354,0 -0.2374232800162302,39.1781682163842,0 -0.2374933500486161,39.17811505580328,0 -0.2377188542500985,39.17794393220495,0 -0.2379238243910988,39.1777581905156,0 -0.2380863827103339,39.17752842920909,0 -0.2382239595904208,39.17728858509518,0 -0.2383617957360357,39.17705108116757,0 -0.2384997999106659,39.17681363599746,0 -0.2386956810808934,39.1765036429606,0 -0.2388324205066969,39.17613980780499,0 -0.238947971280603,39.17600429740043,0 -0.2391024732217223,39.17581250361309,0 -0.2392267848361785,39.17545314077792,0 -0.2393116842658358,39.17514456825472,0 -0.2394282813808895,39.17484294350813,0 -0.2396033739329366,39.17459443028282,0 -0.2397154406603762,39.17423477562335,0 -0.2397954221200792,39.17391249876278,0 -0.239834060657756,39.17355110420162,0 -0.2399268060428242,39.17337214695398,0 -0.2401853503425025,39.17302549878512,0 -0.2400875079536953,39.17270854099913,0 -0.2402900479574298,39.17238440099216,0 -0.2403900430385075,39.17213865064451,0 -0.2404686989460755,39.17188807378616,0 -0.2405481516189001,39.17166555072259,0 -0.2405965337540742,39.17143821474312,0 -0.2405481994446468,39.17110812877046,0 -0.2405866162763467,39.17090881502225,0 -0.2406330437428456,39.17050469848386,0 -0.240688586132197,39.17010823839364,0 -0.2407314545253863,39.16971089954832,0 -0.2407341624985487,39.16943683000271,0 -0.2407345184078834,39.16916273804534,0 -0.2407475275813296,39.16891749441272,0 -0.2407659402237909,39.16867245628595,0 -0.2407821434834644,39.16841261721971,0 -0.240816833119969,39.16815403149203,0 -0.2409420503258325,39.16777085082789,0 -0.2409783084313193,39.16754804435073,0 -0.2410023850570108,39.16732415824487,0 -0.2410335646761262,39.16706997029424,0 -0.2410590209325744,39.1668154043799,0 -0.2410772437041549,39.16650596462425,0 -0.2410743604182261,39.1662317309336,0 -0.2410680659805044,39.16595751280988,0 -0.2410781487633282,39.16554300045991,0 -0.2410599161997844,39.16531133891128,0 -0.2410411458649178,39.16507969974779,0 -0.2410466482274193,39.1648176547217,0 -0.2410555110399017,39.16455564245681,0 -0.2410456603818244,39.16422147721983,0 -0.2410265162481702,39.16388753952715,0 -0.2410062392984581,39.16356499745215,0 -0.2409782365537759,39.16324281555603,0 -0.2409217634133312,39.16280765776188,0 -0.2408673139085119,39.16247742670854,0 -0.2408664366447936,39.16218660354134,0 -0.240800309718752,39.16184179401383,0 -0.2407376947277155,39.16156380972278,0 -0.2407228818370371,39.16126247258202,0 -0.2406938592487273,39.16096209602228,0 -0.2406334531306445,39.16078427620551,0 -0.2406310856592624,39.16053155535728,0 -0.2406400234361826,39.16030293922599,0 -0.240574430792458,39.16010116053305,0 -0.2405425935026557,39.15981913785438,0 -0.2405783954961061,39.15968650295694,0 -0.2405279911449222,39.15956612705616,0 -0.2404609097293429,39.15940245070313,0 -0.2404563081405882,39.1592068838585,0 -0.2403666445927411,39.15911179728214,0 -0.2402928757431482,39.15876680629535,0 -0.2402031277983811,39.15836065481837,0 -0.2401820823020254,39.15813330827142,0 -0.2401658069344386,39.15790568827823,0 -0.2401339670907486,39.15765595534729,0 -0.2400934571643561,39.15740698719149,0 -0.2400120504678875,39.15702248538634,0 -0.2399537717475986,39.1567838608709,0 -0.239902159645191,39.15654434658601,0 -0.2398762971152902,39.15631158309465,0 -0.2398560832746703,39.1560784471701,0 -0.2398034647972265,39.15566244833572,0 -0.2397843765471852,39.1554327895008,0 -0.2397571099878693,39.15520369266742,0 -0.239685268477471,39.15494400154726,0 -0.239607467454814,39.15468528172883,0 -0.239527323961517,39.15426863028697,0 -0.2395079068012586,39.15403897529499,0 -0.239480971334639,39.15380987450854,0 -0.239358279773688,39.15342439352055,0 -0.2392183555510469,39.15300989946498,0 -0.2391390310013199,39.1526898046553,0 -0.2391871664730058,39.15251574905858,0 -0.2390500168016953,39.15214780239436,0 -0.238915500779941,39.15182997370683,0</coordinates>
        </LineString>
      </MultiGeometry>
    </Placemark>
    <Placemark id="ID_00002">
      <name>1985</name>
      <Snippet></Snippet>
      <description><![CDATA[<html xmlns:fo="http://www.w3.org/1999/XSL/Format" xmlns:msxsl="urn:schemas-microsoft-com:xslt">

<head>

<META http-equiv="Content-Type" content="text/html">

<meta http-equiv="content-type" content="text/html; charset=UTF-8">

</head>

<body style="margin:0px 0px 0px 0px;overflow:auto;background:#FFFFFF;">

<table style="font-family:Arial,Verdana,Times;font-size:12px;text-align:left;width:100%;border-collapse:collapse;padding:3px 3px 3px 3px">

<tr style="text-align:center;font-weight:bold;background:#9CBCE2">

<td>1985</td>

</tr>

<tr>

<td>

<table style="font-family:Arial,Verdana,Times;font-size:12px;text-align:left;width:100%;border-spacing:0px; padding:3px 3px 3px 3px">

<tr>

<td>YEAR</td>

<td>1985</td>

</tr>

</table>

</td>

</tr>

</table>

</body>

</html>

]]></description>
      <styleUrl>#LineStyle02</styleUrl>
      <MultiGeometry>
        <LineString>
          <extrude>0</extrude>
          <tessellate>1</tessellate><altitudeMode>clampToGround</altitudeMode>
          <coordinates> -0.2206474844970176,39.18051887985884,0 -0.2206578745829448,39.18060493782384,0 -0.2206773036545008,39.18069478719275,0 -0.2207925501912311,39.18080122537715,0 -0.2212140353943763,39.18094715149275,0 -0.2216617060866601,39.18101146572667,0 -0.2218970431479113,39.18098490307452,0 -0.2223887470211346,39.18086434355072,0 -0.2226591092955786,39.18072377547699,0 -0.2228927750607804,39.18054742733233,0 -0.2231231471865394,39.18033619417681,0 -0.2232601477362969,39.18008423329954,0 -0.2232229708133099,39.17986167043048,0 -0.2229793032123844,39.17986658508884,0 -0.222895196580974,39.17978591945851,0 -0.2230489369468314,39.17942128888031,0 -0.2234877825678263,39.17920295664876,0 -0.2237683044705204,39.17919534400234,0 -0.2239610638673837,39.1791999399415,0 -0.2243359975255134,39.17924463224725,0 -0.2246577768893463,39.17935598997863,0 -0.2249578251024446,39.17955263892311,0 -0.2253176809288672,39.17974713762514,0 -0.2257574805757651,39.18001147277202,0 -0.2259274824735293,39.18024434998099,0 -0.2261112539020618,39.1804775558915,0 -0.2263418049365283,39.18061991007558,0 -0.2266021083383843,39.180728802544,0 -0.2269030180468286,39.1808356724036,0 -0.2272146857387551,39.18092216273903,0 -0.2276884973366314,39.18102283097955,0 -0.2280039905401092,39.18105008560575,0 -0.2283214458251968,39.18104862687968,0 -0.2287505289910041,39.18100163364378,0 -0.2289769650999293,39.18096769257612,0 -0.229204985749602,39.18077647031289,0 -0.2294092567495858,39.18048814634248,0 -0.2293479918708873,39.18025919405491,0 -0.229334864913635,39.18004302316816,0 -0.2294962012009626,39.18002898578454,0 -0.2295183074888673,39.1800509638624,0 -0.2296675188172596,39.18011172088217,0 -0.2300555301364283,39.18017458421532,0 -0.2304200707729935,39.18013319965053,0 -0.2306630395712356,39.18014613010192,0 -0.2308312723155514,39.18030744983815,0 -0.2310302706689631,39.18038726653742,0 -0.2312448598307686,39.18042097294696,0 -0.2314932599166343,39.18041257785217,0 -0.2316449975945442,39.18040903439733,0 -0.2318839020451593,39.18052555311935,0 -0.2321078121294499,39.18055590389439,0 -0.2323755523510027,39.18052293894795,0 -0.232557630632538,39.18044860705747,0 -0.2326579018653351,39.18046886762673,0 -0.2328808311856661,39.18052422133236,0 -0.233087224120807,39.18053270183731,0 -0.2333603945773284,39.18047841067369,0 -0.2336351058105113,39.18038482604803,0 -0.2337785376302699,39.18024164120987,0 -0.2339954776158552,39.18033260516474,0 -0.2343627864817882,39.18033775469868,0 -0.2347579466867963,39.18021842494041,0 -0.2351465863752972,39.18003100616231,0 -0.2353200421641438,39.17994216344326,0 -0.2356577727211054,39.1797642592383,0 -0.2359004531641795,39.17958296070326,0 -0.2361272594355712,39.17938925879231,0 -0.236370434895295,39.17919363685601,0 -0.2366067605406473,39.17899304014402,0 -0.2368708713847084,39.17873946844622,0 -0.2371185500045633,39.17847602158328,0 -0.2373288203608861,39.17823438642809,0 -0.2375236552077259,39.17798507299634,0 -0.2377576760506995,39.17760354829306,0 -0.2379763790283533,39.17721636875645,0 -0.2381741328473286,39.17692154530242,0 -0.2383780378962176,39.17662923672697,0 -0.2385623506893447,39.17632925775536,0 -0.2386668673596358,39.17611352521003,0 -0.2387721634391918,39.17589802995732,0 -0.2389412312667944,39.17563475072079,0 -0.2391052107193536,39.17536961183492,0 -0.2392354322263754,39.17503852675413,0 -0.2393471886388572,39.17470316769907,0 -0.2394872926995883,39.17435301489687,0 -0.2396226847918952,39.17400176280724,0 -0.2397476213988744,39.17361818719031,0 -0.2398549393178276,39.17323139828607,0 -0.2399384854432921,39.17283869175208,0 -0.2400143201549629,39.17244500505155,0 -0.2400850754842743,39.17209933184214,0 -0.2401653348032905,39.17175494958368,0 -0.2402448804826608,39.17150524440314,0 -0.240318119472,39.17125443383404,0 -0.2403633022753567,39.17091275337197,0 -0.2403862471200414,39.17056956387265,0 -0.2404035585544178,39.1702623929035,0 -0.2404286337490004,39.16995559329629,0 -0.2404758022505658,39.16968634588127,0 -0.2405323310178463,39.16941815988714,0 -0.2406186228003638,39.16903226984967,0 -0.2407049008339925,39.16864637849036,0 -0.2407722821901537,39.1683285596468,0 -0.2408262708042256,39.16800925133567,0 -0.2408499129586816,39.16758789559786,0 -0.2408500578834021,39.16716601099749,0 -0.240843864545615,39.16676187520358,0 -0.2408403251578327,39.16635773020147,0 -0.2408494482409778,39.16613269247879,0 -0.2408579236418792,39.16590764210417,0 -0.2408554403187321,39.16560934591348,0 -0.2408434541985624,39.16531117860002,0 -0.2408285986207881,39.16501308652684,0 -0.2408050250596092,39.16468203216399,0 -0.2407901966469024,39.16435072013658,0 -0.2408027659965131,39.16408642274856,0 -0.2408200433014242,39.16382226212642,0 -0.2408306898267372,39.16350898603462,0 -0.2408357534416212,39.16319562719456,0 -0.2408338303833136,39.16288224784191,0 -0.2408204217007604,39.16246322921259,0 -0.2407930939102567,39.16204462850124,0 -0.240743797776828,39.16161948833813,0 -0.2406885386723973,39.16119477170665,0 -0.2406579975066016,39.1609187383351,0 -0.2406300887922539,39.160692824782,0 -0.2406089822238613,39.16052785413805,0 -0.2405906488355934,39.1604094300962,0 -0.2404815478247966,39.16014583683823,0 -0.2404885094875007,39.16008521916542,0 -0.2404921618526183,39.15987435519733,0 -0.2404177915933468,39.15977963105578,0 -0.2404346287281428,39.15970136999708,0 -0.2404403547501511,39.15955491256754,0 -0.2403501456704251,39.15939545564407,0 -0.240308172960139,39.15929434875601,0 -0.2403175304013713,39.15905501558252,0 -0.2402402497904368,39.1589173171212,0 -0.2401931724314427,39.15859441168993,0 -0.240141506929278,39.15827139749511,0 -0.2400533950952093,39.15805835781587,0 -0.2400737456000067,39.15777280425949,0 -0.2399714720409127,39.15745216621868,0 -0.2398917212261054,39.15714278799283,0 -0.2398604807381446,39.15691912764642,0 -0.2398403580384068,39.15669463981114,0 -0.2398212105867591,39.15647965883196,0 -0.2397600707372233,39.15628156085054,0 -0.2397306199961054,39.15604354292583,0 -0.2397098272632043,39.15580483561515,0 -0.2396357847781874,39.15546698898153,0 -0.2396200102809769,39.15504828770119,0 -0.2395426164943916,39.15479617206919,0 -0.2395066323901157,39.15465945199789,0 -0.239408534300183,39.15434963848108,0 -0.2393325616210408,39.15407684024533,0 -0.2392646015063445,39.1538027589364,0 -0.2392158356474164,39.15356536132305,0 -0.2391637549860727,39.15332840942463,0 -0.2390744159775893,39.15302952935301,0 -0.2389644922865875,39.15278736819966,0 -0.2388551490769242,39.15241292924399,0 -0.2388701927843469,39.15226311703538,0 -0.2389796234739037,39.15216559921254,0 -0.2389052628171864,39.15207087435712,0 -0.2387665341954322,39.15197819986646,0 -0.2386584057110485,39.15180758976832,0</coordinates>
        </LineString>
      </MultiGeometry>
    </Placemark>
    <Placemark id="ID_00003">
      <name>1989</name>
      <Snippet></Snippet>
      <description><![CDATA[<html xmlns:fo="http://www.w3.org/1999/XSL/Format" xmlns:msxsl="urn:schemas-microsoft-com:xslt">

<head>

<META http-equiv="Content-Type" content="text/html">

<meta http-equiv="content-type" content="text/html; charset=UTF-8">

</head>

<body style="margin:0px 0px 0px 0px;overflow:auto;background:#FFFFFF;">

<table style="font-family:Arial,Verdana,Times;font-size:12px;text-align:left;width:100%;border-collapse:collapse;padding:3px 3px 3px 3px">

<tr style="text-align:center;font-weight:bold;background:#9CBCE2">

<td>1989</td>

</tr>

<tr>

<td>

<table style="font-family:Arial,Verdana,Times;font-size:12px;text-align:left;width:100%;border-spacing:0px; padding:3px 3px 3px 3px">

<tr>

<td>YEAR</td>

<td>1989</td>

</tr>

</table>

</td>

</tr>

</table>

</body>

</html>

]]></description>
      <styleUrl>#LineStyle03</styleUrl>
      <MultiGeometry>
        <LineString>
          <extrude>0</extrude>
          <tessellate>1</tessellate><altitudeMode>clampToGround</altitudeMode>
          <coordinates> -0.2207592452229674,39.18037828419492,0 -0.2208290185571309,39.18047291087871,0 -0.2207935137175698,39.18055787334944,0 -0.2208112538740515,39.18069058735831,0 -0.2209949230372099,39.18080938545165,0 -0.2213030746517076,39.18091685156701,0 -0.2216381167805599,39.18092484693364,0 -0.2221100553339607,39.18083957064217,0 -0.2223739519459293,39.18075247097444,0 -0.2226275194041488,39.18064811636741,0 -0.2229035099194464,39.18052240884406,0 -0.223081763060221,39.18031213533087,0 -0.2231399830379855,39.18011687528973,0 -0.2230976040523615,39.18002647894522,0 -0.2228644318582178,39.17988147574161,0 -0.2231852917906081,39.17954946309097,0 -0.2233702786449915,39.17951812094002,0 -0.2237764067960355,39.17947059857549,0 -0.2241958809986841,39.17943411898223,0 -0.2245663668157682,39.17947512978152,0 -0.2248528368978699,39.17954989069185,0 -0.2251221664907184,39.17971005333219,0 -0.2252850937788275,39.17988913181414,0 -0.2254505027963445,39.18012190025004,0 -0.2255932950872267,39.18022899015276,0 -0.22575008927468,39.18044725212781,0 -0.2259809276163546,39.18053498643676,0 -0.2262128431581469,39.18071213252573,0 -0.2265590791998806,39.18090272645847,0 -0.2270569168355971,39.18109335523791,0 -0.2273881687479558,39.18119778074455,0 -0.2277998329373062,39.18124333667183,0 -0.2282434857234326,39.18129322920265,0 -0.2284239726280319,39.181279051945,0 -0.2287076218564112,39.18117258206045,0 -0.2288375790913488,39.18108033005999,0 -0.2289341089969009,39.18097496805042,0 -0.2291711966853303,39.1807088776104,0 -0.2293187357926101,39.18038344905965,0 -0.2292385181940874,39.1801684338783,0 -0.2292128111912789,39.17996141218222,0 -0.2293732266005672,39.17993185859016,0 -0.2296100132234027,39.17998516540296,0 -0.2297909771103993,39.18005621192115,0 -0.2299921713512959,39.18008006777882,0 -0.2303939969482421,39.18014206584598,0 -0.2306758669304664,39.18013923615497,0 -0.2307938185992626,39.18009913646037,0 -0.2307801707845293,39.18025502318553,0 -0.2308313776835017,39.18029247228822,0 -0.2311134249768763,39.18038323687941,0 -0.2315228689609845,39.18040727471838,0 -0.2316293310458761,39.18034783177229,0 -0.2316899652553563,39.18036357599858,0 -0.2317125730043374,39.18041178519609,0 -0.2319280151872801,39.18054085580023,0 -0.2322569722777637,39.18058681340639,0 -0.2325347800644643,39.18053144344644,0 -0.2326249376085727,39.18041917192465,0 -0.2326855721668802,39.18043491474209,0 -0.2329716937206528,39.18047985313689,0 -0.2333959946122691,39.18043749564311,0 -0.2337068253900594,39.18032093322892,0 -0.233820713050201,39.18022829375844,0 -0.2339037701535027,39.18029700877463,0 -0.2341843325891419,39.18032750952815,0 -0.2345578519240636,39.18017429547173,0 -0.2349730848160003,39.18005067417816,0 -0.2354104095655744,39.17983223069043,0 -0.2356526338866085,39.17965869386976,0 -0.2358778081088782,39.17947148339338,0 -0.2361474844549705,39.17924126698486,0 -0.2364045684884013,39.17900249524796,0 -0.2367365840968609,39.17865759928097,0 -0.2369734701053847,39.17838653989066,0 -0.2372110570572266,39.17811585877735,0 -0.2374105727353193,39.17792071839008,0 -0.2376001908350837,39.17771987529702,0 -0.237759963080634,39.17745517291887,0 -0.2379149905350498,39.17718864424089,0 -0.2380887891942132,39.17697347376664,0 -0.2382810955676326,39.17666248946649,0 -0.2384503317241484,39.17634323879327,0 -0.2386180151795068,39.17602996359278,0 -0.2387872043203461,39.17571718418252,0 -0.2389103791441811,39.17551092260963,0 -0.2390300159086571,39.17530342385226,0 -0.2391625051565773,39.17502181304094,0 -0.2392849084345308,39.17473739807338,0 -0.239439306292123,39.17440172648896,0 -0.2395807969077928,39.17406269644363,0 -0.2396865189175081,39.17371579309062,0 -0.239779521892216,39.1733666214537,0 -0.2398704744113508,39.17304965768084,0 -0.2399574637199625,39.1727320278035,0 -0.2400268230011221,39.1724527959557,0 -0.2400895889283787,39.17217262489471,0 -0.2401514181386921,39.17183345353283,0 -0.2402080132318506,39.17149371482117,0 -0.24024820902155,39.17127306781389,0 -0.2402865269770851,39.17105222132399,0 -0.240345752130654,39.17063410651208,0 -0.2404050479116063,39.17039487343872,0 -0.2404624646142341,39.17015538047703,0 -0.2404910993267041,39.1699059333707,0 -0.2405126174996154,39.16965600769034,0 -0.2405539193740672,39.16933031428377,0 -0.2405993222644376,39.1690049486561,0 -0.2406385888289415,39.16874616156532,0 -0.2406746910958101,39.16848710397176,0 -0.2407010624765903,39.16821132125823,0 -0.2407207693663707,39.16793519411902,0 -0.2407314777464963,39.1676612924642,0 -0.2407483063556274,39.16738761329765,0 -0.2407902597021138,39.16709780431285,0 -0.2407827334445319,39.16666380644478,0 -0.2407629709601574,39.16622951771056,0 -0.2407689574252869,39.16591978804964,0 -0.2407603136583923,39.16551436620601,0 -0.2407837513807607,39.16507156685269,0 -0.2407815234375034,39.16481398100238,0 -0.2407732730618961,39.16455645514399,0 -0.2407590691031828,39.16413660064342,0 -0.2407510800032143,39.16389086198217,0 -0.2407415411726544,39.16364515776291,0 -0.2407249745402159,39.16336825471382,0 -0.2407080800412455,39.16309136280374,0 -0.2406977866487818,39.16281698134219,0 -0.2406866685096021,39.16254262086844,0 -0.2406672674463779,39.16226801276581,0 -0.2406469044092715,39.16199344492005,0 -0.2406353248633607,39.16172843290266,0 -0.2406186300987253,39.16146360867459,0 -0.2405843154203841,39.16119024172372,0 -0.2405358552587312,39.16091818009366,0 -0.2404728695027803,39.16064972105833,0 -0.2404019308566215,39.16027142711565,0 -0.2402716784846428,39.15984405470518,0 -0.2401851468871487,39.15956234295278,0 -0.2400915816958303,39.15928201668437,0 -0.2399970796016689,39.15903664727634,0 -0.2399433522214587,39.15884468364126,0 -0.2399161446792636,39.15860090820176,0 -0.2398961726696587,39.15832870165052,0 -0.2398667584556141,39.1579847616543,0 -0.2397498367625466,39.15768642030839,0 -0.239699119108234,39.15726093146309,0 -0.2396886182863173,39.15690313884326,0 -0.2396938613119943,39.15661245968036,0 -0.2395752660594329,39.15635698372251,0 -0.2394768851916985,39.15605431492334,0 -0.2394098895706117,39.1557702539373,0 -0.2393583502815533,39.15548420076126,0 -0.2393187243335344,39.15522624068654,0 -0.2392867061998062,39.15496763842559,0 -0.239252295287031,39.15459497621693,0 -0.2392170434856219,39.15428616320063,0 -0.239172329890869,39.15397810422983,0 -0.2390903228217019,39.15361684866366,0 -0.2390169398714372,39.15325456416574,0 -0.2389961323921571,39.15297559159654,0 -0.2389897950332221,39.15269615036932,0 -0.2389869310221822,39.15241727436055,0 -0.238999353854102,39.1521386076127,0 -0.2390498391206731,39.15178702724399,0</coordinates>
        </LineString>
      </MultiGeometry>
    </Placemark>
    <Placemark id="ID_00004">
      <name>2000</name>
      <Snippet></Snippet>
      <description><![CDATA[<html xmlns:fo="http://www.w3.org/1999/XSL/Format" xmlns:msxsl="urn:schemas-microsoft-com:xslt">

<head>

<META http-equiv="Content-Type" content="text/html">

<meta http-equiv="content-type" content="text/html; charset=UTF-8">

</head>

<body style="margin:0px 0px 0px 0px;overflow:auto;background:#FFFFFF;">

<table style="font-family:Arial,Verdana,Times;font-size:12px;text-align:left;width:100%;border-collapse:collapse;padding:3px 3px 3px 3px">

<tr style="text-align:center;font-weight:bold;background:#9CBCE2">

<td>2000</td>

</tr>

<tr>

<td>

<table style="font-family:Arial,Verdana,Times;font-size:12px;text-align:left;width:100%;border-spacing:0px; padding:3px 3px 3px 3px">

<tr>

<td>YEAR</td>

<td>2000</td>

</tr>

</table>

</td>

</tr>

</table>

</body>

</html>

]]></description>
      <styleUrl>#LineStyle04</styleUrl>
      <MultiGeometry>
        <LineString>
          <extrude>0</extrude>
          <tessellate>1</tessellate><altitudeMode>clampToGround</altitudeMode>
          <coordinates> -0.2204422230651518,39.18084027031603,0 -0.220458704439269,39.18088833535617,0 -0.2204849842288809,39.18099860935049,0 -0.220582483670245,39.18108913054032,0 -0.2207346833509928,39.18119049150301,0 -0.220920821986573,39.18128551197106,0 -0.2211355304330359,39.18135499446224,0 -0.2214296995200713,39.18142875571197,0 -0.221680037304727,39.18144903121269,0 -0.2219497656251582,39.18144354927205,0 -0.2221709122311834,39.18142737352126,0 -0.2223897503115062,39.18139207219457,0 -0.2226430892505906,39.18133614229274,0 -0.2228515624777622,39.18125292124343,0 -0.2229865669740502,39.18124660624245,0 -0.2231280651841752,39.18123091271624,0 -0.2234706393073636,39.18108653077621,0 -0.2237289995856608,39.18094271726594,0 -0.2239725720573813,39.18078386154346,0 -0.2242467358176054,39.18058779080408,0 -0.2241989041259089,39.18055804716224,0 -0.2239879438903921,39.18039331554202,0 -0.2239684940406106,39.18034279553459,0 -0.2240705898976058,39.1803166263446,0 -0.2241392760637452,39.18036116889159,0 -0.2243934202608097,39.18057045450675,0 -0.2247009168076549,39.18072018213749,0 -0.2247834352864424,39.18072453277539,0 -0.2249941210324244,39.18066281261038,0 -0.2252428966665302,39.18064490570207,0 -0.2254559228615421,39.18075724425995,0 -0.2257088190613743,39.18086814957432,0 -0.2259712705440727,39.18096974785553,0 -0.226209244450839,39.18107076152344,0 -0.2263309490731736,39.18116900590333,0 -0.2265612438117701,39.18123169843982,0 -0.2268867327171236,39.18113218814984,0 -0.2272498099401569,39.18093346036104,0 -0.2275320354676116,39.18075314568651,0 -0.2278004309726901,39.18056042545419,0 -0.2280581431738358,39.18034694862049,0 -0.2283134209317072,39.18013166911004,0 -0.2285207608505952,39.17997251683595,0 -0.228736056237696,39.17981994085874,0 -0.2291219429636289,39.17958599617851,0 -0.2290852153913339,39.17935152682517,0 -0.2293933090324695,39.17938269516536,0 -0.2294082995814617,39.17946886195767,0 -0.2294649372262303,39.17950834716675,0 -0.2297098733208991,39.17958806727694,0 -0.2300805380572295,39.17966362757417,0 -0.2304409289443852,39.17968888597841,0 -0.2306710617327726,39.17967767433172,0 -0.2307966040012063,39.17967827644885,0 -0.2308485252523911,39.17968189506183,0 -0.2308598287351108,39.17970599973103,0 -0.2308495282500853,39.17973435812486,0 -0.2308199333668397,39.17978609437845,0 -0.2308114761225208,39.17984548373844,0 -0.230890349078801,39.17994270382564,0 -0.2310583278507637,39.18003250877705,0 -0.2312905868051401,39.18004518322079,0 -0.2315533492507788,39.18006096534683,0 -0.2320111179219171,39.18002417707218,0 -0.2323063463517445,39.17999305671275,0 -0.2328093567523648,39.17997402524058,0 -0.2333340643150832,39.17994835675331,0 -0.2336679712541209,39.17986809651028,0 -0.234108522273356,39.17972362683118,0 -0.2345078945726246,39.17961393209676,0 -0.2348637980241426,39.17944123025997,0 -0.2350906937481469,39.17930247175324,0 -0.2353098514272801,39.17915625343298,0 -0.2355330628934835,39.17900900121115,0 -0.235722524969113,39.17886333107947,0 -0.2359864437959819,39.1786932085132,0 -0.2362350632197848,39.17852272217722,0 -0.2364878609147088,39.17832373105735,0 -0.2366898392384295,39.17813847825196,0 -0.2368733802726972,39.17794196600215,0 -0.2370318305866948,39.17773565091692,0 -0.2371746241845749,39.1775224461222,0 -0.2373118959162356,39.17730164260215,0 -0.2374877262872008,39.17708701945665,0 -0.2376715466517838,39.17687635672473,0 -0.2378318019970987,39.17667504541385,0 -0.237975467814479,39.17646643228312,0 -0.2381255504720715,39.17615297004594,0 -0.2382277798424721,39.1758884299099,0 -0.238312007204743,39.17569258657687,0 -0.2384644925347493,39.17539586629819,0 -0.2386430389506465,39.17505924246807,0 -0.2388505155494711,39.17468755052656,0 -0.2389937262722895,39.17439299329893,0 -0.2391196637364619,39.17412478470383,0 -0.239241377714513,39.17385539924348,0 -0.2393615119837529,39.17358536357311,0 -0.2394708548523558,39.17331260616836,0 -0.2395497188767985,39.1730613592884,0 -0.2396191987692484,39.17280841060651,0 -0.2396836042758536,39.17257078112764,0 -0.2397419466361071,39.17233221238176,0 -0.2398186943371621,39.17193596636521,0 -0.2398677831965621,39.17169876735564,0 -0.2398894607589486,39.17130121585237,0 -0.2399503348028455,39.17099755415675,0 -0.239977261532809,39.17077889901012,0 -0.2400092970118409,39.17050792558477,0 -0.240057545588518,39.17029215865026,0 -0.2401420542211177,39.17001051091956,0 -0.2402133151198551,39.16967610796542,0 -0.240303224551127,39.16925633745109,0 -0.2403597322775912,39.16898594293407,0 -0.2403643102226973,39.16879059477802,0 -0.2404039507900737,39.16848166283339,0 -0.240451107954084,39.16813715421501,0 -0.2404860919455401,39.16792359515989,0 -0.2405168188246254,39.16770965862671,0 -0.2405364275108957,39.16744315706069,0 -0.2405446227966919,39.1672335919398,0 -0.2405532836236707,39.16701211988408,0 -0.2405723319169708,39.16675990673626,0 -0.2405896392741619,39.16639562222705,0 -0.2406282525693271,39.16611288543229,0 -0.2406287466290078,39.16594366010278,0 -0.2406760057898203,39.16551811079529,0 -0.2406721638803802,39.16522483282892,0 -0.2406423589085828,39.16496907909402,0 -0.2405946652383046,39.1647009825821,0 -0.2406035772929173,39.16462968508339,0 -0.2405854362908751,39.1644671685538,0 -0.2405567492326091,39.16418283689396,0 -0.2405143639534895,39.1637789991618,0 -0.2405098705294438,39.16350239210568,0 -0.240526324804879,39.16323819940242,0 -0.2405000727926283,39.16281329086909,0 -0.2404724106104184,39.16250276371777,0 -0.2404415383292006,39.16227558264595,0 -0.2404105687009604,39.16204840916446,0 -0.2403847556609265,39.16176891304647,0 -0.2403340201431152,39.16142208423526,0 -0.2403203877580233,39.16120489720872,0 -0.2403081417341691,39.16098765113838,0 -0.240279534260594,39.16075554620745,0 -0.2402466741249382,39.16052377020958,0 -0.2402018705739013,39.16018184943112,0 -0.2401046012276136,39.15985060317151,0 -0.2400551565151986,39.15954909468608,0 -0.2399571575525629,39.1591582402461,0 -0.2398844973588752,39.1588130014293,0 -0.2398250113795225,39.15846623968925,0 -0.2397828939512893,39.15809354554449,0 -0.2397439481535898,39.15772062564788,0 -0.239708986586623,39.15747039339679,0 -0.2396685891133366,39.15722066110788,0 -0.2396185021550278,39.15697018651387,0 -0.2395657029717093,39.15672004309765,0 -0.2395096626469044,39.15645839854165,0 -0.2394637481569827,39.15619561200928,0 -0.2394391503127093,39.15588515706623,0 -0.2394260573932792,39.15551538405391,0 -0.2394292665731032,39.15519843692128,0 -0.2393727934033056,39.15484193729135,0 -0.2393766785308475,39.15461443468,0 -0.2393844626416627,39.15438694070414,0 -0.2393397728382158,39.15396397913928,0 -0.2391994298986053,39.15356020214431,0 -0.2391180651480329,39.1533396964793,0 -0.2390329565237844,39.15312005064278,0 -0.2389273136011407,39.15287890535686,0 -0.2388284012730018,39.15263609163457,0 -0.2387570759089751,39.15239763191411,0 -0.2387032777244616,39.15215639855214,0 -0.2386602393441232,39.15184788987386,0</coordinates>
        </LineString>
      </MultiGeometry>
    </Placemark>
    <Placemark id="ID_00005">
      <name>2004</name>
      <Snippet></Snippet>
      <description><![CDATA[<html xmlns:fo="http://www.w3.org/1999/XSL/Format" xmlns:msxsl="urn:schemas-microsoft-com:xslt">

<head>

<META http-equiv="Content-Type" content="text/html">

<meta http-equiv="content-type" content="text/html; charset=UTF-8">

</head>

<body style="margin:0px 0px 0px 0px;overflow:auto;background:#FFFFFF;">

<table style="font-family:Arial,Verdana,Times;font-size:12px;text-align:left;width:100%;border-collapse:collapse;padding:3px 3px 3px 3px">

<tr style="text-align:center;font-weight:bold;background:#9CBCE2">

<td>2004</td>

</tr>

<tr>

<td>

<table style="font-family:Arial,Verdana,Times;font-size:12px;text-align:left;width:100%;border-spacing:0px; padding:3px 3px 3px 3px">

<tr>

<td>YEAR</td>

<td>2004</td>

</tr>

</table>

</td>

</tr>

</table>

</body>

</html>

]]></description>
      <styleUrl>#LineStyle05</styleUrl>
      <MultiGeometry>
        <LineString>
          <extrude>0</extrude>
          <tessellate>1</tessellate><altitudeMode>clampToGround</altitudeMode>
          <coordinates> -0.2205409384443879,39.18065511525126,0 -0.2205423091117523,39.18069805294295,0 -0.2205459506921223,39.18083877358497,0 -0.220616776347834,39.18106214042398,0 -0.2208000054422089,39.18123098367077,0 -0.2209890165727146,39.18133083921514,0 -0.2212993295088987,39.18138353407616,0 -0.221531213580967,39.18140575324983,0 -0.2219671647841955,39.18145667689588,0 -0.2225037491411455,39.18144087501651,0 -0.2230222904673621,39.18133883035058,0 -0.2234773588876307,39.181137540974,0 -0.2239560001120592,39.18088198981408,0 -0.2242550491952083,39.18059831772435,0 -0.2241632904038719,39.18051747146657,0 -0.223912366455703,39.18035655357018,0 -0.2240207090430244,39.18024948998592,0 -0.2240623257565166,39.18028146928675,0 -0.2243181164272483,39.18046502338886,0 -0.224584188815728,39.1806395347247,0 -0.2247845056187017,39.18076349035377,0 -0.2251909532528384,39.18063016073154,0 -0.2254164052115915,39.18073802886497,0 -0.2257541467916872,39.18088615016715,0 -0.2260874884061428,39.1810400521092,0 -0.2262584294650234,39.18113231827984,0 -0.22663368919849,39.18132479620564,0 -0.2268614230033819,39.18129684960249,0 -0.227208299539476,39.18127650745692,0 -0.2274870788312994,39.1811186764106,0 -0.2276329769133996,39.18099105162322,0 -0.2277635101650063,39.18078678491597,0 -0.2280499322989903,39.18051233727391,0 -0.2284161195167418,39.1801563613352,0 -0.228724809141676,39.18003943343545,0 -0.2289993282241263,39.17988897555118,0 -0.2290390935449971,39.17965632750957,0 -0.2291178588768733,39.17952233556228,0 -0.2291362940841344,39.17913064606257,0 -0.2290065144579365,39.17874624905916,0 -0.2289616691257629,39.17835302922831,0 -0.228980148008583,39.17827242553651,0 -0.2290680638473611,39.17821731105696,0 -0.2291810834285843,39.17822476816492,0 -0.2292707209822875,39.17828172420256,0 -0.2292947960237641,39.17837049095775,0 -0.2292506249727781,39.17848147045311,0 -0.2292942740314287,39.17853971586766,0 -0.2295639099852,39.17877019213254,0 -0.2299155717856748,39.17909557976601,0 -0.2302143393921439,39.17928622633167,0 -0.2305725521036329,39.17944491427686,0 -0.2310410773549659,39.17968011764242,0 -0.2314954279587621,39.1798863787434,0 -0.2318781248781617,39.18004564579164,0 -0.232393581982527,39.18025573993111,0 -0.2328413089429762,39.18031882062405,0 -0.2334195289975386,39.180256285101,0 -0.2337110601049267,39.1802031356592,0 -0.2339970242115248,39.18013413893851,0 -0.2345216834515185,39.17995352819513,0 -0.2348174022135156,39.17977792318508,0 -0.2350935837163129,39.17958334729545,0 -0.2353634125392307,39.17940728551577,0 -0.2356222697104582,39.17922167258151,0 -0.2359907648165507,39.17888384214588,0 -0.2362485895971656,39.17860971920111,0 -0.2365095280065805,39.17833743440135,0 -0.2367518752233967,39.1781272568921,0 -0.2370011044448083,39.17792195564294,0 -0.2373329483680203,39.17764379473788,0 -0.2375439868862325,39.1774318158921,0 -0.2377328423277106,39.17720754470228,0 -0.2379639685548111,39.1768578686368,0 -0.238171137927154,39.1765162589075,0 -0.2383766098196627,39.17617402112558,0 -0.2386211801083581,39.1757936752942,0 -0.2387636353443979,39.17548589249044,0 -0.2388873997380466,39.17517309512776,0 -0.2390322679614028,39.17481557036743,0 -0.2391756993083735,39.17445769330692,0 -0.2392973075650895,39.17416653155509,0 -0.2394159423663269,39.17387463429651,0 -0.2395346615531871,39.17352994371102,0 -0.2396602798517581,39.17318679219272,0 -0.2397841011995855,39.17291799387795,0 -0.2397760867114896,39.17265322163847,0 -0.2398264657431997,39.17246134219022,0 -0.2399151200446752,39.17222837652663,0 -0.2399990691896921,39.17199442899013,0 -0.2400486636901866,39.17172863934138,0 -0.2401039814738414,39.17139715414334,0 -0.2401603360346065,39.1710657772545,0 -0.2402254347337855,39.17074396336528,0 -0.2402932866838032,39.17042248944431,0 -0.2403594527446098,39.17011838712708,0 -0.2404175521899856,39.16981331971345,0 -0.240445970645244,39.16951166775507,0 -0.2404778835685885,39.16921026164997,0 -0.2405233867695108,39.1689863258344,0 -0.2405664648179264,39.16863647640558,0 -0.2406496429520757,39.16827630967374,0 -0.2407293823053959,39.16791571452482,0 -0.2407535777114456,39.16763894688296,0 -0.2407681919173608,39.16736172606778,0 -0.2407802389996971,39.16717894935723,0 -0.2408140070325606,39.16680983596863,0 -0.2408458526609878,39.1664406256461,0 -0.2408590718712464,39.16617206626791,0 -0.2408668590940014,39.16590337726903,0 -0.2408528723039355,39.16553422595409,0 -0.2408614234557185,39.16516527801546,0 -0.2409104125648835,39.16491472730223,0 -0.2409024546254452,39.16461706171341,0 -0.2408590426166253,39.16434906673732,0 -0.2408339291137099,39.16408838726397,0 -0.2408218852750289,39.16382712556954,0 -0.2408229217415963,39.16359416106131,0 -0.2408247925606553,39.16336119559463,0 -0.2407966243983028,39.16291489405506,0 -0.240754032048754,39.16246923358817,0 -0.2407189933896684,39.16209291934859,0 -0.2406824135871509,39.16171669379114,0 -0.2406474510312268,39.16129523194082,0 -0.240600522781182,39.16087452435857,0 -0.2405396632523631,39.16054531237922,0 -0.2404700759254725,39.16021712686793,0 -0.2403827830203947,39.15979962118195,0 -0.2402868279691946,39.15938328130794,0 -0.2402029700749297,39.15907164204536,0 -0.2401121015515254,39.15876118791505,0 -0.2400201779980993,39.15845092221864,0 -0.2399088017217568,39.15808793703329,0 -0.2398052176441797,39.15772358778695,0 -0.2397391084346653,39.15741490037265,0 -0.2396778342315816,39.15710559148679,0 -0.2396143184460902,39.15683281487949,0 -0.2395568356860364,39.15655925601931,0 -0.2395169260386414,39.15620108156355,0 -0.2394838354174019,39.15584243719524,0 -0.2394602498630845,39.15567049493551,0 -0.2393968396588039,39.15541704944662,0 -0.2393306558262426,39.15516400032966,0 -0.2392859237621223,39.15486736977675,0 -0.2392478746717108,39.1545251320212,0 -0.2392268168301052,39.15412418283367,0 -0.2392324508836619,39.15372958709747,0 -0.2391932103364945,39.15341783084698,0 -0.2391246822333056,39.15310347395152,0 -0.2390719419151341,39.15282381551471,0 -0.2390732943544919,39.1527265956413,0 -0.2390915122791794,39.15244861943026,0 -0.2391708141058485,39.15223692624709,0 -0.2392243815380844,39.15205703995248,0 -0.2391267047435179,39.15179919903906,0</coordinates>
        </LineString>
      </MultiGeometry>
    </Placemark>
    <Placemark id="ID_00006">
      <name>2006</name>
      <Snippet></Snippet>
      <description><![CDATA[<html xmlns:fo="http://www.w3.org/1999/XSL/Format" xmlns:msxsl="urn:schemas-microsoft-com:xslt">

<head>

<META http-equiv="Content-Type" content="text/html">

<meta http-equiv="content-type" content="text/html; charset=UTF-8">

</head>

<body style="margin:0px 0px 0px 0px;overflow:auto;background:#FFFFFF;">

<table style="font-family:Arial,Verdana,Times;font-size:12px;text-align:left;width:100%;border-collapse:collapse;padding:3px 3px 3px 3px">

<tr style="text-align:center;font-weight:bold;background:#9CBCE2">

<td>2006</td>

</tr>

<tr>

<td>

<table style="font-family:Arial,Verdana,Times;font-size:12px;text-align:left;width:100%;border-spacing:0px; padding:3px 3px 3px 3px">

<tr>

<td>YEAR</td>

<td>2006</td>

</tr>

</table>

</td>

</tr>

</table>

</body>

</html>

]]></description>
      <styleUrl>#LineStyle06</styleUrl>
      <MultiGeometry>
        <LineString>
          <extrude>0</extrude>
          <tessellate>1</tessellate><altitudeMode>clampToGround</altitudeMode>
          <coordinates> -0.2204737111604741,39.18077048218925,0 -0.2204957295169054,39.18087231219447,0 -0.2205054538344917,39.18089757200834,0 -0.2206865607748603,39.18104252807374,0 -0.2208181866766322,39.18112194578402,0 -0.2210052635759878,39.18119315271745,0 -0.2212571579502051,39.18125160372467,0 -0.2215675646043213,39.18130191634479,0 -0.2218460958165383,39.18130617884022,0 -0.2220087325347785,39.18129814143667,0 -0.222361260572664,39.18128986651847,0 -0.2226940592701826,39.1812382149374,0 -0.2230541476598408,39.18111570495211,0 -0.2233133478200061,39.18101541198855,0 -0.22356475851367,39.18090382198719,0 -0.2238368616241916,39.18076014313926,0 -0.2240946025363293,39.18059228361608,0 -0.2241832747422266,39.18051812267527,0 -0.2239586690901298,39.18038881940575,0 -0.2239186446450558,39.18031635679473,0 -0.2239331326591737,39.18025949556084,0 -0.2240367886776269,39.18027150107425,0 -0.2241981704669435,39.18037307646571,0 -0.2244082118049186,39.18052854985588,0 -0.2246336455889458,39.18066949171969,0 -0.22478447612912,39.18072790980489,0 -0.2249398992953177,39.18066964095352,0 -0.225183774284807,39.18062062937101,0 -0.2253765049910943,39.1807038819561,0 -0.2256259674028444,39.18082423976599,0 -0.226035911019243,39.18099132645482,0 -0.2263685197506168,39.18117802065111,0 -0.2265749915824465,39.18122346112477,0 -0.2268783128643745,39.18114249202121,0 -0.2271055151587693,39.18105017429473,0 -0.227473212245394,39.1808896942139,0 -0.2276082462482185,39.18080471577421,0 -0.2277574540349832,39.18074867799596,0 -0.2278499303831883,39.18065553468809,0 -0.2281397847386651,39.18037163437566,0 -0.228413590900874,39.1801064195957,0 -0.2286733763694753,39.17988616012213,0 -0.2289976027506619,39.17966266524849,0 -0.2291379080455651,39.17959926338793,0 -0.2291161667784843,39.17934401572418,0 -0.2290689172655525,39.17909467806697,0 -0.2293924015476569,39.17912382799929,0 -0.2296340624744329,39.17928689755269,0 -0.2299208052454284,39.17939383152546,0 -0.2303295622375592,39.1795132014103,0 -0.2306657550255357,39.17953073310724,0 -0.2311470384931558,39.17959700214265,0 -0.231452235535858,39.17970198835838,0 -0.2318504410603202,39.17977819699109,0 -0.2321343164465351,39.17988029076079,0 -0.2324762341490026,39.17998614632798,0 -0.2328245518831227,39.18008500260922,0 -0.2331517982865123,39.18014331240795,0 -0.2333727164871515,39.18013282960165,0 -0.2336204560605963,39.18009438024902,0 -0.2338552330088779,39.18005848365037,0 -0.2340758834240666,39.18000794840424,0 -0.2344487787099498,39.1798237326986,0 -0.2347405793375873,39.17964912129169,0 -0.2350232725304373,39.17946553166135,0 -0.2352947438948071,39.17929034687197,0 -0.2354614482724725,39.17916272856814,0 -0.2358496506278557,39.17891594421361,0 -0.2360611957081526,39.17875558885962,0 -0.2362595115156401,39.17858529213587,0 -0.2365253248089661,39.17831986890715,0 -0.2368278866441185,39.1779970769943,0 -0.2370364658779972,39.17775412925118,0 -0.2372357708783082,39.17751334572215,0 -0.2373973331728885,39.17729788598648,0 -0.2376092466957723,39.17704786585131,0 -0.2377890886042565,39.17675656312986,0 -0.2379804221016245,39.17648460193759,0 -0.238157201172479,39.17619322593541,0 -0.2383273009946587,39.17591599292758,0 -0.2384405551142436,39.17568270035466,0 -0.2386119741193038,39.17529346734536,0 -0.2387351674063307,39.1749626819343,0 -0.238882090235465,39.17465152741453,0 -0.2390031373084596,39.17437551385799,0 -0.2391608971660759,39.17410037063613,0 -0.2392753357554625,39.17386422144294,0 -0.2393846148557064,39.17362656692244,0 -0.2395708542037113,39.17324960158309,0 -0.2396685229379554,39.17302308945984,0 -0.2397072382866898,39.17273797195654,0 -0.2397767344701435,39.17244881744633,0 -0.2397826204007675,39.17222012854855,0 -0.2397965646356193,39.1720202350049,0 -0.2398100590471237,39.17175358882417,0 -0.2398368002943191,39.17153969688483,0 -0.2398597513713147,39.17126612352875,0 -0.2398995688508181,39.17103108847965,0 -0.2399842508272363,39.17082333650598,0 -0.2400986082278173,39.17056146469753,0 -0.2401685658932701,39.17026040280842,0 -0.2402227320782943,39.17012820352657,0 -0.2402427001818714,39.16993083549347,0 -0.2402596874746188,39.16980967297754,0 -0.2402834611020437,39.16959332675047,0 -0.2403179365185736,39.16927557250897,0 -0.240345495892317,39.16913463810226,0 -0.240373733774288,39.16892936153889,0 -0.2404077580483482,39.16871707257904,0 -0.2404444564729186,39.16848339302921,0 -0.2404691993357217,39.16822654736553,0 -0.2405122882264264,39.16801733260738,0 -0.2405091538982916,39.16781560438445,0 -0.2405297702107027,39.16761729843675,0 -0.2405559872778374,39.1675106562817,0 -0.2405671926993944,39.16736504325961,0 -0.2405582247589381,39.16712456165232,0 -0.2405478599549205,39.16691980081575,0 -0.24054251617262,39.16663363863151,0 -0.2405488378607609,39.16642498313686,0 -0.2405587109331433,39.16626646741014,0 -0.2405752642984013,39.16607807679075,0 -0.2405905235960987,39.16596974430874,0 -0.2405929055286725,39.16581486544816,0 -0.2406028955320868,39.16567685147655,0 -0.2406003825385684,39.16546703254766,0 -0.2406006289790278,39.16538241986263,0 -0.2406244844459439,39.16520302112301,0 -0.2406448625832918,39.16503426695117,0 -0.240645588091851,39.16485908764912,0 -0.2406322619050088,39.16473005534031,0 -0.2406256992632374,39.16462382914222,0 -0.2406101053363226,39.16447448282233,0 -0.2405927587211655,39.16440911800941,0 -0.2405055167184906,39.16421278485894,0 -0.2404844235734215,39.16396915457084,0 -0.2404767642940874,39.16377351538161,0 -0.2404829895264347,39.1636926200209,0 -0.2405092450629554,39.16356929320419,0 -0.2404953741426087,39.16337589058111,0 -0.2405040339351512,39.16315441838769,0 -0.2404793241307654,39.1629250050049,0 -0.2404807480890351,39.16273196481083,0 -0.2404150609706774,39.1625325667048,0 -0.2404293587142484,39.16240180609091,0 -0.2404531143695498,39.16226411918016,0 -0.2404264619663777,39.16200605534721,0 -0.2404181509372377,39.16182708617831,0 -0.240392244776617,39.1615499716215,0 -0.2403500200473269,39.16129869004484,0 -0.2402760088164341,39.16099898237889,0 -0.2402644527916575,39.16082470382722,0 -0.2401933163058629,39.16052983177595,0 -0.2401685286464025,39.16022413925699,0 -0.2401438204012384,39.15999472577653,0 -0.2400801987974117,39.15966427692668,0 -0.2399997145331977,39.15929529069123,0 -0.2399566081749234,39.15906498615049,0 -0.2399074745248239,39.15883544774015,0 -0.2398013115644694,39.1584968399927,0 -0.2396826361577969,39.15814935361119,0 -0.2396080056233876,39.1579282908488,0 -0.2395842514077587,39.15765885493305,0 -0.2394873230404757,39.15731903515733,0 -0.2394337471272279,39.15712326046608,0 -0.2393591171217245,39.15690219754897,0 -0.2392807264482391,39.15666774277786,0 -0.2392380425638899,39.15642832186141,0 -0.2392451094261583,39.15631026190253,0 -0.2392590929215147,39.15607795101441,0 -0.239251655385371,39.15583902331169,0 -0.2392336838014817,39.1556003846112,0 -0.2392076114542708,39.15524937227541,0 -0.2392132295709724,39.15494916868548,0 -0.2392581288678452,39.15474047346568,0 -0.2392338258868209,39.15434421491033,0 -0.2391945618224194,39.15396568357534,0 -0.2391194061238626,39.15359065896624,0 -0.2390037045576518,39.15326135846434,0 -0.2389791728757941,39.15310584043436,0 -0.2389348994959187,39.15283629706185,0 -0.238908464299493,39.15256546398668,0 -0.2389287368897641,39.15220363228059,0 -0.2389545385907515,39.15201355361918,0 -0.2389174010514007,39.15186727179577,0</coordinates>
        </LineString>
      </MultiGeometry>
    </Placemark>
    <Placemark id="ID_00007">
      <name>2008</name>
      <Snippet></Snippet>
      <description><![CDATA[<html xmlns:fo="http://www.w3.org/1999/XSL/Format" xmlns:msxsl="urn:schemas-microsoft-com:xslt">

<head>

<META http-equiv="Content-Type" content="text/html">

<meta http-equiv="content-type" content="text/html; charset=UTF-8">

</head>

<body style="margin:0px 0px 0px 0px;overflow:auto;background:#FFFFFF;">

<table style="font-family:Arial,Verdana,Times;font-size:12px;text-align:left;width:100%;border-collapse:collapse;padding:3px 3px 3px 3px">

<tr style="text-align:center;font-weight:bold;background:#9CBCE2">

<td>2008</td>

</tr>

<tr>

<td>

<table style="font-family:Arial,Verdana,Times;font-size:12px;text-align:left;width:100%;border-spacing:0px; padding:3px 3px 3px 3px">

<tr>

<td>YEAR</td>

<td>2008</td>

</tr>

</table>

</td>

</tr>

</table>

</body>

</html>

]]></description>
      <styleUrl>#LineStyle07</styleUrl>
      <MultiGeometry>
        <LineString>
          <extrude>0</extrude>
          <tessellate>1</tessellate><altitudeMode>clampToGround</altitudeMode>
          <coordinates> -0.2204276027014959,39.18084651942024,0 -0.2204551963525418,39.18092345395453,0 -0.2204968538956454,39.18098546941861,0 -0.22055178705876,39.18105256839857,0 -0.2207584050512983,39.18117191379094,0 -0.2209420579690096,39.18126782803453,0 -0.2211161987153695,39.18132537751458,0 -0.221363922787586,39.18138086843238,0 -0.2216515630011032,39.1814182430466,0 -0.221861999838476,39.1814251715497,0 -0.2221786682094968,39.18140984432324,0 -0.222432593152326,39.18137013681201,0 -0.2226260726356167,39.18130991771655,0 -0.2228883906679207,39.18124371237276,0 -0.2232306886703074,39.18113746292961,0 -0.2236088293313943,39.1809920224924,0 -0.2238376017248402,39.18087543625973,0 -0.2239971356667673,39.18079056965598,0 -0.2241435571510584,39.18066534465197,0 -0.2241916098468476,39.18056494887336,0 -0.2241516345079093,39.18050678827633,0 -0.2239079020152319,39.18039657557378,0 -0.2239153979780726,39.18029950206733,0 -0.2239830624089872,39.18026107067977,0 -0.2240932488174923,39.18030946393056,0 -0.224239625474859,39.18041878595383,0 -0.2244756587591722,39.18058459138715,0 -0.2247508636576554,39.18073559864951,0 -0.2248565741612064,39.18071094464684,0 -0.2250592672035161,39.18064998790436,0 -0.2251956813583822,39.18063893729363,0 -0.2254324106964016,39.18074040034284,0 -0.2256797061631651,39.18085355601761,0 -0.2259508128587992,39.18096870820105,0 -0.2262376558360495,39.18110425698256,0 -0.2264866206667157,39.18122174078536,0 -0.226705574867366,39.18126128022533,0 -0.2270601188902557,39.18112384743813,0 -0.2273102199385972,39.18099240564264,0 -0.2275469513706677,39.18084654687335,0 -0.2277658078392419,39.1807015899293,0 -0.2279081579044509,39.18058627478116,0 -0.228112830348269,39.18042810840313,0 -0.2284346362544256,39.1801883495777,0 -0.2288298741873351,39.17995033665319,0 -0.2291053315148467,39.17972091412599,0 -0.2291452342954253,39.17957129112693,0 -0.2293873460392594,39.17935622286479,0 -0.2295147998290421,39.17939416252289,0 -0.2297027423830871,39.17944344657188,0 -0.2298729906956729,39.1794935805136,0 -0.23022788928113,39.17958068315922,0 -0.2305316156449519,39.17964511460334,0 -0.2307056451773056,39.17965878802678,0 -0.2308269109023949,39.17969027552972,0 -0.2308797416837172,39.17974873873352,0 -0.2310592369037912,39.17977922796928,0 -0.2313734522695169,39.17981053577082,0 -0.2315905940375572,39.17983381401883,0 -0.2319938790406618,39.17985865777026,0 -0.2323602224330224,39.1798883418064,0 -0.2326385969708479,39.17991212043901,0 -0.232811342112367,39.17994292312166,0 -0.2330922399916742,39.17996485344936,0 -0.2332609871524341,39.17997267685625,0 -0.2335750507022257,39.17996107094776,0 -0.2338858616578298,39.17990743408882,0 -0.2341361509206423,39.17983519760783,0 -0.2343693796544589,39.17976064725636,0 -0.2345672918682693,39.17964950475396,0 -0.2348094259826024,39.17948840170271,0 -0.2350666694244965,39.17933242445751,0 -0.235444081563717,39.17915784689053,0 -0.235755204598456,39.17895547562132,0 -0.2359347596410797,39.17874997937597,0 -0.2361597621284988,39.17847881976493,0 -0.2363919817935418,39.17825788829089,0 -0.2366830986906945,39.17794062507092,0 -0.2369403520968385,39.1777059839475,0 -0.2372067081886736,39.17739528215798,0 -0.2373724478377244,39.17721282675335,0 -0.2375304651818684,39.17702635187619,0 -0.2377422096097179,39.17670243516028,0 -0.2379844541723507,39.17638162528552,0 -0.2381834892100627,39.17606932505228,0 -0.2383850396106648,39.1756927259551,0 -0.2385130491144957,39.17539542510499,0 -0.2386176995153038,39.17506896669951,0 -0.2387188067171551,39.17483300196459,0 -0.2388550600291823,39.17455973295418,0 -0.2390547380907312,39.17423076080895,0 -0.2391850547306871,39.17395258305469,0 -0.2392883791951811,39.17373812244278,0 -0.2393802110285393,39.17350432089797,0 -0.2394731604147339,39.17324194232533,0 -0.2395307770545764,39.17302163118486,0 -0.2396058192157019,39.17282556990132,0 -0.239664273620166,39.1725838255043,0 -0.2397024144823377,39.17239165599455,0 -0.2397371239601558,39.17220894020414,0 -0.2397759165527428,39.17200010061421,0 -0.2398130330243396,39.17183412643487,0 -0.2398337632641936,39.17153904832105,0 -0.2398751339667468,39.17142084765762,0 -0.2399432304218695,39.17116741455194,0 -0.2400110469157768,39.17092112426649,0 -0.2400943456615991,39.1706704342459,0 -0.2401957202527294,39.17042732387866,0 -0.240220768552707,39.17033495588171,0 -0.2402461105776198,39.17015678448706,0 -0.240244571263715,39.16996129138897,0 -0.24022838654256,39.16974876478465,0 -0.2402615095054432,39.16960653254865,0 -0.2403260773071797,39.16936493254497,0 -0.2403682049710036,39.16914902126532,0 -0.2404049444309096,39.16899257295044,0 -0.240380792889283,39.16874887030398,0 -0.2403882439090977,39.16855835687133,0 -0.2403905073861167,39.16834388367809,0 -0.2403952866062861,39.16806511276585,0 -0.2404279705760104,39.1677774689598,0 -0.2404452501734243,39.16757050291525,0 -0.2404785855067912,39.16726618900366,0 -0.2404712058314074,39.16706340520494,0 -0.2404967317955661,39.16688047137225,0 -0.2405230957550137,39.16667610433693,0 -0.2405429039493879,39.16632617992931,0 -0.2405634419055601,39.16603586440232,0 -0.2405796314561213,39.1657001568388,0 -0.2405504923280411,39.16534907247406,0 -0.2405239333157709,39.16508862809161,0 -0.2405079491024726,39.16479267950039,0 -0.2405074314948162,39.16457098987027,0 -0.2404612147296729,39.16434344973526,0 -0.240449844438921,39.16416440812238,0 -0.2404717647183142,39.16391703049671,0 -0.2404963727182744,39.16367925074034,0 -0.2404927026084571,39.16345987014589,0 -0.2405040355640978,39.1633266555089,0 -0.2404641414630228,39.16309402195555,0 -0.2404147840972439,39.16291550983603,0 -0.2404231911680769,39.16276315747531,0 -0.2404370136739491,39.16259758395116,0 -0.2404182253984263,39.16232635879611,0 -0.2404395595690708,39.16203129445055,0 -0.2404254311214757,39.1618288280635,0 -0.2403660620264159,39.16165580024971,0 -0.2403078106312956,39.16145419450811,0 -0.2402988118467301,39.1611832012974,0 -0.2402795653146283,39.16098633428315,0 -0.240257895176321,39.16066355358399,0 -0.2402298069844411,39.16044915996799,0 -0.2401987205766811,39.16023500519459,0 -0.2401566657929078,39.15986979016801,0 -0.2401114814610971,39.15958459071682,0 -0.2400669570346775,39.15934517246699,0 -0.2400032291677242,39.15909576486631,0 -0.2399447627591004,39.15879712896975,0 -0.239889437061632,39.15849811432632,0 -0.2398226035476586,39.15820286651595,0 -0.239806712208857,39.15792026841243,0 -0.2396821829542851,39.1576598843782,0 -0.2396091191606678,39.1573666923503,0 -0.2395852998858145,39.1570683549826,0 -0.2395873348453579,39.15689106153542,0 -0.2395819420482237,39.15677842601277,0 -0.2396361719814507,39.15664432096761,0 -0.2396548988676481,39.15641593686221,0 -0.2395618854318914,39.15616392760742,0 -0.2395804122153873,39.15581540315042,0 -0.2395770774512207,39.15539961926683,0 -0.2395860402863118,39.15504514736842,0 -0.2395249244863633,39.15472906013404,0 -0.2394594728150068,39.15449720583017,0 -0.239388722130303,39.15426626731166,0 -0.2392838730048477,39.15387858670624,0 -0.2392500481866675,39.15355361115871,0 -0.2392068070923997,39.15321887816123,0 -0.2392069290199816,39.15296526296093,0 -0.2391495920019301,39.15267786767667,0 -0.2390708804867915,39.15249865986996,0 -0.2390030241165975,39.15216715669952,0 -0.2389672627092124,39.15189171423234,0</coordinates>
        </LineString>
      </MultiGeometry>
    </Placemark>
    <Placemark id="ID_00008">
      <name>2010</name>
      <Snippet></Snippet>
      <description><![CDATA[<html xmlns:fo="http://www.w3.org/1999/XSL/Format" xmlns:msxsl="urn:schemas-microsoft-com:xslt">

<head>

<META http-equiv="Content-Type" content="text/html">

<meta http-equiv="content-type" content="text/html; charset=UTF-8">

</head>

<body style="margin:0px 0px 0px 0px;overflow:auto;background:#FFFFFF;">

<table style="font-family:Arial,Verdana,Times;font-size:12px;text-align:left;width:100%;border-collapse:collapse;padding:3px 3px 3px 3px">

<tr style="text-align:center;font-weight:bold;background:#9CBCE2">

<td>2010</td>

</tr>

<tr>

<td>

<table style="font-family:Arial,Verdana,Times;font-size:12px;text-align:left;width:100%;border-spacing:0px; padding:3px 3px 3px 3px">

<tr>

<td>YEAR</td>

<td>2010</td>

</tr>

</table>

</td>

</tr>

</table>

</body>

</html>

]]></description>
      <styleUrl>#LineStyle08</styleUrl>
      <MultiGeometry>
        <LineString>
          <extrude>0</extrude>
          <tessellate>1</tessellate><altitudeMode>clampToGround</altitudeMode>
          <coordinates> -0.2204294169174144,39.18085655452091,0 -0.2205285085161799,39.18095331099801,0 -0.2206542916537433,39.18107215747987,0 -0.2208389360619071,39.18118954758551,0 -0.2210466246254574,39.18128174532938,0 -0.2213225211380838,39.18136841923874,0 -0.2216986813362423,39.18142888170768,0 -0.2220200687979718,39.18143368984358,0 -0.2224147639181344,39.18135014591176,0 -0.2228384031352108,39.18123153550108,0 -0.22317225263665,39.18110649300467,0 -0.2234784150060781,39.18093788340217,0 -0.2237384348015816,39.18082108845576,0 -0.2239961879863312,39.18066848606198,0 -0.2240435470148463,39.18060907071663,0 -0.2241274360682017,39.18048521607109,0 -0.2239333841627779,39.18037332660412,0 -0.2239142786554998,39.18029850241599,0 -0.2240114849974292,39.18025648531552,0 -0.2241173249800998,39.18032193601607,0 -0.2244174784254888,39.18053932651351,0 -0.224760759354027,39.18073486155428,0 -0.2251601313891059,39.18062567577415,0 -0.2253882429846657,39.18071263096414,0 -0.2256891592614783,39.1808429426229,0 -0.2259840682527296,39.18098139860235,0 -0.2263447208786978,39.18115588995367,0 -0.2266820704131308,39.18131552437897,0 -0.2269087417519722,39.18125227521907,0 -0.2271186844339767,39.18114715191557,0 -0.2273945830389216,39.18095349784648,0 -0.2276367288387314,39.18076674206029,0 -0.2278653752389058,39.18056998064879,0 -0.228111750319029,39.18031630799621,0 -0.2283449996869321,39.18005509627788,0 -0.2286249140281407,39.1797653482003,0 -0.2288809426318986,39.17946289049965,0 -0.2290815551496462,39.17912728485749,0 -0.2293480934241245,39.17946161315504,0 -0.2294567728837264,39.17953284728436,0 -0.2296309908196045,39.1795884786943,0 -0.2299012228587755,39.1796635570793,0 -0.230187563609161,39.17970278591595,0 -0.2304339751475991,39.17969815923299,0 -0.2307449642614776,39.17967123210393,0 -0.2308218924152551,39.17964636554329,0 -0.2308745094119747,39.17967908063299,0 -0.230835773457727,39.17972964544583,0 -0.2308128899329831,39.1798444687234,0 -0.230792133940895,39.18002989696581,0 -0.2308232608639354,39.1801107266946,0 -0.2308712715374123,39.18016716897462,0 -0.2310330417903176,39.18023179768779,0 -0.2314132886041742,39.18029745111249,0 -0.2317012222780507,39.18031806653807,0 -0.231990463664152,39.18032011249129,0 -0.2323316354395394,39.18030682830319,0 -0.2326700010887434,39.18027071533804,0 -0.2330866858507708,39.18018825303448,0 -0.2334264092821365,39.18011587851278,0 -0.2337545874237774,39.17999662725666,0 -0.2340719279287593,39.17986007810003,0 -0.2343476402743412,39.17975699397422,0 -0.2346163670648031,39.17964358659308,0 -0.2349678382612164,39.17942695156852,0 -0.2352927585621449,39.17918590500727,0 -0.2356314948024432,39.17891892624861,0 -0.2359646424108067,39.1786476642757,0 -0.2362979357332479,39.17839471364451,0 -0.2366277001446181,39.17813900621541,0 -0.2369038650382837,39.17790741579608,0 -0.2371705553970928,39.17766920442688,0 -0.2375168144372878,39.17733179532069,0 -0.2377062201869816,39.17707910137948,0 -0.2378637107594977,39.17681326271003,0 -0.2380146441581526,39.1765450917005,0 -0.2381726558055273,39.17626839382496,0 -0.2383235067896934,39.1759892862481,0 -0.2384820126519751,39.17567849173311,0 -0.2386312214362561,39.1753649242543,0 -0.238757227816192,39.17507333592252,0 -0.238874813017615,39.17477961351675,0 -0.2389910167343916,39.17448555641113,0 -0.2390874393389882,39.17424520187878,0 -0.2391821023191407,39.17400442445096,0 -0.2392943721102707,39.17371762951861,0 -0.2393960348626615,39.17342848839921,0 -0.239466565585459,39.17315187479436,0 -0.2395325459374176,39.1728745523567,0 -0.2396119856174453,39.17260679753226,0 -0.2396913016514708,39.17233902078683,0 -0.2397625729375778,39.17205950739022,0 -0.2398280407437312,39.17177913024332,0 -0.2398844985572105,39.17152598166134,0 -0.2399359119073015,39.17127218734503,0 -0.2400008815676852,39.1708834087516,0 -0.2400623008138649,39.17052140525487,0 -0.240122603426059,39.17015928874882,0 -0.2401755088093099,39.16982445077347,0 -0.2402131898831665,39.16957497940495,0 -0.2402531951166391,39.16932573066266,0 -0.2403307293180722,39.16894363597672,0 -0.240411676520858,39.16856195902876,0 -0.240481550487698,39.16823305084449,0 -0.2405324039836657,39.16790217204571,0 -0.2405368365615081,39.16747560803545,0 -0.240568279058091,39.16706037950505,0 -0.2406029895912112,39.16664528964187,0 -0.2406008615370799,39.16640914575314,0 -0.2406183685430667,39.16617369597033,0 -0.2406883049883727,39.16595129210069,0 -0.2406687804437719,39.16574583761761,0 -0.2406114291574803,39.16556809024053,0 -0.2405967618830673,39.16516014276948,0 -0.2406187888926051,39.16483172390241,0 -0.2406614059332197,39.1644465859676,0 -0.2406739627869876,39.16420375397636,0 -0.2405637184876201,39.16381261000635,0 -0.240567950544094,39.16346946766718,0 -0.2406265647397788,39.16330161951103,0 -0.2406796200741094,39.16311933695751,0 -0.2406165391789106,39.16285325956697,0 -0.240534903870789,39.16267016913023,0 -0.2404962960466712,39.1624046715976,0 -0.2405228573010114,39.16211688242303,0 -0.2405803675932338,39.1618989515424,0 -0.2405447112741456,39.16171456684626,0 -0.2404591017440289,39.16147655897676,0 -0.2403884942512652,39.16132471701385,0 -0.2404246698973517,39.16118255686276,0 -0.2403911422066329,39.16102205939323,0 -0.2403325332798998,39.16064167293677,0 -0.2403329477484912,39.16039616933981,0 -0.2403216709464313,39.16021474607383,0 -0.2402005677211083,39.15994490959626,0 -0.2401777862086631,39.15982280441223,0 -0.2401844767348904,39.15973000208169,0 -0.2401459780860432,39.15938346312749,0 -0.2400703069608635,39.15904796203645,0 -0.240010900134769,39.15881172345802,0 -0.2399510047618772,39.15857555885285,0 -0.2399133060219831,39.15835171125175,0 -0.2398489380887711,39.15813216844679,0 -0.2396395067074575,39.15785070360793,0 -0.2395950510484841,39.15765657580219,0 -0.2396269717368865,39.15746664217474,0 -0.2396092205821275,39.15721594036497,0 -0.2394674737541854,39.15684788531511,0 -0.2393993726106807,39.15671040390161,0 -0.2394092444829327,39.15645797308571,0 -0.2393988908322017,39.15616347016623,0 -0.2394047184942683,39.15586910937854,0 -0.239454259986272,39.15562000267549,0 -0.2394141673771503,39.15539260713837,0 -0.2393909524039095,39.1551250901945,0 -0.2393591197791977,39.15484306720102,0 -0.2394006026497538,39.15456516594117,0 -0.2394027587689553,39.15443173372457,0 -0.2393685732511831,39.15414727115996,0 -0.2392844448428512,39.15398128370071,0 -0.2392675859760327,39.15372345157365,0 -0.2392903368724694,39.15339218930288,0 -0.2393087267761462,39.15298454820191,0 -0.2392291678520171,39.15257649141673,0 -0.2392141604264499,39.15233395893876,0 -0.2392501762161968,39.15203924249163,0 -0.2392069008466701,39.15189329182552,0</coordinates>
        </LineString>
      </MultiGeometry>
    </Placemark>
    <Placemark id="ID_00009">
      <name>2012</name>
      <Snippet></Snippet>
      <description><![CDATA[<html xmlns:fo="http://www.w3.org/1999/XSL/Format" xmlns:msxsl="urn:schemas-microsoft-com:xslt">

<head>

<META http-equiv="Content-Type" content="text/html">

<meta http-equiv="content-type" content="text/html; charset=UTF-8">

</head>

<body style="margin:0px 0px 0px 0px;overflow:auto;background:#FFFFFF;">

<table style="font-family:Arial,Verdana,Times;font-size:12px;text-align:left;width:100%;border-collapse:collapse;padding:3px 3px 3px 3px">

<tr style="text-align:center;font-weight:bold;background:#9CBCE2">

<td>2012</td>

</tr>

<tr>

<td>

<table style="font-family:Arial,Verdana,Times;font-size:12px;text-align:left;width:100%;border-spacing:0px; padding:3px 3px 3px 3px">

<tr>

<td>YEAR</td>

<td>2012</td>

</tr>

</table>

</td>

</tr>

</table>

</body>

</html>

]]></description>
      <styleUrl>#LineStyle09</styleUrl>
      <MultiGeometry>
        <LineString>
          <extrude>0</extrude>
          <tessellate>1</tessellate><altitudeMode>clampToGround</altitudeMode>
          <coordinates> -0.2204125538589831,39.18083838186302,0 -0.2204273086480558,39.18100797111941,0 -0.2204972698093628,39.1810978349616,0 -0.2206609571932725,39.18121853943106,0 -0.2208805663314382,39.18131912554403,0 -0.221103516375336,39.18141264060757,0 -0.2213799838414314,39.18146929498226,0 -0.2216633221987536,39.18150704348083,0 -0.222018817407092,39.18150122417821,0 -0.2222217006253983,39.18148222792159,0 -0.2224313589715178,39.18144670841457,0 -0.2228202051013604,39.18129389812121,0 -0.2231772348013007,39.18117131479963,0 -0.2235896535834445,39.18096424117651,0 -0.2239955146998557,39.18069026800016,0 -0.2241853779561415,39.18053509247627,0 -0.2240960231831418,39.18047098800584,0 -0.2239263989515841,39.18034537924164,0 -0.2239721409661198,39.1802725777459,0 -0.2240552212090719,39.18026264062142,0 -0.2242670404212109,39.18038712901318,0 -0.2244324664028454,39.18056005117678,0 -0.2247496764277605,39.18074876752452,0 -0.2252109181006618,39.18062389424675,0 -0.2254788308382561,39.18074230920477,0 -0.2257270062190376,39.18085463800764,0 -0.225972105611875,39.18097097134358,0 -0.226320293596364,39.18115088646641,0 -0.2266048210990659,39.1812363237984,0 -0.2267989911158555,39.18120519406941,0 -0.2270913150173859,39.18106930170286,0 -0.2273413434976514,39.18088678829629,0 -0.2275783409111107,39.18067917507874,0 -0.2278080688777775,39.18046646669781,0 -0.2280670164016861,39.18026764074279,0 -0.22842193671859,39.1800424953916,0 -0.2288292438375217,39.17980906070114,0 -0.229151316479189,39.17964033798517,0 -0.229316369310858,39.17933677911817,0 -0.2294693539080155,39.17934041944022,0 -0.2296468831334412,39.17942091949553,0 -0.2299028416838075,39.17953188858618,0 -0.2301355388456051,39.17961131662857,0 -0.2304490059799559,39.17966167832853,0 -0.2307821396640573,39.17967913603151,0 -0.2310960750947217,39.17971758921173,0 -0.2312749148505206,39.1797647470759,0 -0.2314262180479034,39.17981124990811,0 -0.2316695686364885,39.17993145041784,0 -0.2318599013281197,39.17999794895994,0 -0.2321629770357392,39.18007904615867,0 -0.2324916518378481,39.18013214766285,0 -0.2327205713408314,39.18015189027389,0 -0.2329046221814377,39.18014434651557,0 -0.2330973856615222,39.1801489274334,0 -0.233259739119044,39.1801480178959,0 -0.2335487555730088,39.18011913143551,0 -0.2338821015996869,39.18005315894978,0 -0.2341311759589143,39.17994942900191,0 -0.2343692249961561,39.17981445037987,0 -0.2345883546773992,39.17969332270267,0 -0.2348010837112629,39.1795791938908,0 -0.2349487174737958,39.17948497183519,0 -0.2351025639905496,39.17938851334975,0 -0.2354845499143171,39.17909724692524,0 -0.2358170170809708,39.17881910622999,0 -0.2360901346795284,39.17857054200453,0 -0.2362495568874881,39.17840985619915,0 -0.2364517397467892,39.17817390903291,0 -0.2367464755913622,39.17784242983439,0 -0.2369221254095782,39.17765829229099,0 -0.2371042500882425,39.17745858749371,0 -0.2372778811459157,39.1772543673797,0 -0.2375428528736525,39.17690072679767,0 -0.2377299144808308,39.17665965187136,0 -0.2379452760536302,39.17632151884726,0 -0.2380965522994745,39.17605575761644,0 -0.2382599731027187,39.17579266798513,0 -0.2383804654285847,39.17553094372477,0 -0.2385513083871514,39.17523465961191,0 -0.2386502720887744,39.17505346719258,0 -0.2387712450944612,39.17470117605153,0 -0.2388575199312459,39.17445294149356,0 -0.2389894994142291,39.17421055814935,0 -0.2390500850207932,39.17399270057146,0 -0.2391356122890209,39.17376351729041,0 -0.2392184521059955,39.17352473513546,0 -0.2393332067685194,39.17317467960616,0 -0.2393703083613576,39.17308736515943,0 -0.2394768468531226,39.17285123291195,0 -0.2395756633801215,39.17261312560778,0 -0.2396632368811857,39.17233155012515,0 -0.2397497227884594,39.17192123328983,0 -0.2398466733525484,39.17155645334744,0 -0.2398918797339698,39.17126195539136,0 -0.2399376287379497,39.17103182756674,0 -0.2399684534726436,39.17079181268419,0 -0.239975175571976,39.1705416914015,0 -0.2399572216345858,39.17037441179228,0 -0.2399553094148222,39.1701884431485,0 -0.2399639583263253,39.17004563090533,0 -0.2399656498095938,39.16992410588524,0 -0.2400153884229973,39.16967023753238,0 -0.2400449079256033,39.16946356173287,0 -0.2400970532838466,39.16922643496408,0 -0.2401405643464402,39.16905346174089,0 -0.2402095742445499,39.16885487224916,0 -0.2402503978644238,39.16867230109126,0 -0.2402774013112583,39.16852992288938,0 -0.2402840932092786,39.16843712070087,0 -0.2403035946944803,39.16825165950404,0 -0.2403231891568772,39.16806381763077,0 -0.2403479709515574,39.16789993460022,0 -0.240401217403992,39.16771289022162,0 -0.2404337008782597,39.16750866826042,0 -0.2404654530103051,39.16724483825342,0 -0.240485125874207,39.16713327347932,0 -0.2404838776046591,39.16685197590244,0 -0.2404923522382691,39.16663526697398,0 -0.2404786686798263,39.16643710131601,0 -0.2404759302405314,39.16619390695642,0 -0.2404885953478239,39.16587003385823,0 -0.2404779872638339,39.16563719888465,0 -0.2404608684806314,39.16540456907246,0 -0.2404428484506403,39.16508235254454,0 -0.2404339787370981,39.16491767194081,0 -0.2404412423405838,39.16473192150592,0 -0.2404513926894721,39.16447234611827,0 -0.2404388255706328,39.16424560428933,0 -0.2404160714027007,39.16396617983587,0 -0.2404020822092093,39.16360353732833,0 -0.2403992967309493,39.16342422256415,0 -0.2403841588562323,39.16305964561055,0 -0.2403444407261285,39.1628851762914,0 -0.2403027966762367,39.16269731272461,0 -0.2402825189988896,39.16246418993345,0 -0.2403062798155398,39.1622950384502,0 -0.2403149849576716,39.16213506525529,0 -0.2403096018526144,39.16195950239498,0 -0.2402715761649329,39.16186707009341,0 -0.2402138463534141,39.16165212898104,0 -0.2401972710319864,39.1614496045757,0 -0.2401813553964836,39.16129286137248,0 -0.2401691537897316,39.1611037883026,0 -0.2401703674041925,39.16094745104687,0 -0.2401709225158171,39.16074533260417,0 -0.2401674031658715,39.16052214200337,0 -0.2401233996206732,39.16026938754551,0 -0.2400565649999967,39.15997414078136,0 -0.2399680905310596,39.15960591831511,0 -0.2398481025253375,39.15922932184721,0 -0.2397822895230486,39.15903325729228,0 -0.2397625120660641,39.15891265385317,0 -0.2397330328280713,39.15872698556845,0 -0.2397323444821138,39.15843139923437,0 -0.2396780978620548,39.15825277086424,0 -0.2395663248371256,39.15797934138349,0 -0.2394773095764119,39.15775030966063,0 -0.239441373127492,39.15760453311245,0 -0.2393927145943651,39.15728302049886,0 -0.2393086813248239,39.15698927185326,0 -0.2393130027986627,39.15687877381375,0 -0.239295485730959,39.1565751605806,0 -0.2393026622907504,39.15626641293102,0 -0.2393159118820574,39.1559902253341,0 -0.2393082574559074,39.1556849395738,0 -0.2392721213313266,39.15541902351062,0 -0.2392232715341412,39.15520499503587,0 -0.2391712834641695,39.1549913930378,0 -0.2391149140050681,39.15467923163063,0 -0.239117372741204,39.15461636221276,0 -0.2391065380744571,39.15426714169179,0 -0.2390917154694122,39.15400439028009,0 -0.2390707492629313,39.15374189410716,0 -0.2390446853517923,39.15350374094917,0 -0.2390158951519661,39.15326577449517,0 -0.2389926923626345,39.15302929274512,0 -0.2389608925566983,39.15279346571791,0 -0.2388785790148394,39.15245589902923,0 -0.2388541819033965,39.15207775333594,0 -0.2388467397368763,39.15182967947582,0</coordinates>
        </LineString>
      </MultiGeometry>
    </Placemark>
    <Placemark id="ID_00010">
      <name>2015</name>
      <Snippet></Snippet>
      <description><![CDATA[<html xmlns:fo="http://www.w3.org/1999/XSL/Format" xmlns:msxsl="urn:schemas-microsoft-com:xslt">

<head>

<META http-equiv="Content-Type" content="text/html">

<meta http-equiv="content-type" content="text/html; charset=UTF-8">

</head>

<body style="margin:0px 0px 0px 0px;overflow:auto;background:#FFFFFF;">

<table style="font-family:Arial,Verdana,Times;font-size:12px;text-align:left;width:100%;border-collapse:collapse;padding:3px 3px 3px 3px">

<tr style="text-align:center;font-weight:bold;background:#9CBCE2">

<td>2015</td>

</tr>

<tr>

<td>

<table style="font-family:Arial,Verdana,Times;font-size:12px;text-align:left;width:100%;border-spacing:0px; padding:3px 3px 3px 3px">

<tr>

<td>YEAR</td>

<td>2015</td>

</tr>

</table>

</td>

</tr>

</table>

</body>

</html>

]]></description>
      <styleUrl>#LineStyle010</styleUrl>
      <MultiGeometry>
        <LineString>
          <extrude>0</extrude>
          <tessellate>1</tessellate><altitudeMode>clampToGround</altitudeMode>
          <coordinates> -0.220484001223786,39.18072734269044,0 -0.2205287830407511,39.18084997625746,0 -0.2205771458287809,39.18092835970388,0 -0.2207328438945519,39.18108081357153,0 -0.2208494717019304,39.181152245389,0 -0.221067724867029,39.18125613658807,0 -0.2212173974483701,39.18132835672703,0 -0.221403585714837,39.18135997375008,0 -0.2217450893131808,39.18141388834058,0 -0.2220668706864198,39.18140869413345,0 -0.2224869657046938,39.1813801022702,0 -0.2228976971881944,39.18126261434541,0 -0.2233216164084355,39.18113685845276,0 -0.2237208802054569,39.18103053543145,0 -0.224060330501699,39.18080980228794,0 -0.2242708777754543,39.18059600590907,0 -0.2239880132082831,39.1804061999554,0 -0.2239330346422509,39.18030906842969,0 -0.2240213436375895,39.18025968790231,0 -0.2242263405254298,39.18040473153363,0 -0.2243853185456876,39.18053628331546,0 -0.2247427668823931,39.18072977237801,0 -0.2251737047425909,39.18061228136288,0 -0.2254943140122663,39.18074577632574,0 -0.2259059931684995,39.18093101996999,0 -0.2261654099587384,39.18106305514399,0 -0.2265954773937829,39.1812792449836,0 -0.2269333737283252,39.18122245854997,0 -0.227259080087526,39.18103952611384,0 -0.2273854391987883,39.18094146940076,0 -0.2276492739328903,39.18077422448686,0 -0.2278630276947807,39.18063438995235,0 -0.2280901919104211,39.18045104582828,0 -0.228306514550509,39.18025975583949,0 -0.2286182970924945,39.17999449142965,0 -0.2289197918597105,39.17986627742459,0 -0.2291338614377531,39.17965589273239,0 -0.2290933326614151,39.1793700955197,0 -0.2290872530679167,39.17909606396422,0 -0.2293412935254454,39.17905452413955,0 -0.2294451475555749,39.17909123202757,0 -0.2296749686230277,39.17922827583894,0 -0.2299196255652544,39.17936185868099,0 -0.2302818091732073,39.17962218529037,0 -0.2306873287678365,39.17983968242167,0 -0.2309394827042704,39.17996962798298,0 -0.2312394248708446,39.18009610673569,0 -0.2315422297727713,39.18021850868205,0 -0.2317660601159112,39.18032108194416,0 -0.232089971311095,39.18037073442751,0 -0.2325149907769018,39.1804037200504,0 -0.2325639660137377,39.18034195669256,0 -0.2327158229704694,39.18028073134809,0 -0.2328780312513156,39.18033035182901,0 -0.2329174757199258,39.18038658970276,0 -0.2330435836634962,39.18035716885483,0 -0.2332363808095929,39.18031407865315,0 -0.2337132308129854,39.18014997413245,0 -0.234108349130034,39.17994578858093,0 -0.234445672850665,39.17977836648032,0 -0.2346739479682977,39.17964267759292,0 -0.2350032699243826,39.17942929836747,0 -0.2354071587016902,39.17912615782942,0 -0.2357672844212918,39.17881434991616,0 -0.2361160032365111,39.17849654848535,0 -0.236372140936309,39.17829048560157,0 -0.2367037799446785,39.17795511578728,0 -0.2368775831008226,39.17773994641963,0 -0.2371067382118155,39.17751894071517,0 -0.2373001855058119,39.17734952658484,0 -0.237513946911867,39.17713053765461,0 -0.2375366878966274,39.17701904640659,0 -0.2378037486303902,39.17676978379178,0 -0.2380405264084371,39.17650898606434,0 -0.2380235848354988,39.17639416963556,0 -0.2382092459985241,39.17618881538907,0 -0.238184338156104,39.17604282283784,0 -0.2383431748133159,39.17586255264926,0 -0.2384864812239406,39.17567814456187,0 -0.2384474694526946,39.17557949022546,0 -0.2385288225268333,39.17528413683288,0 -0.238690501706684,39.17500365037734,0 -0.2387462594495001,39.17483096741678,0 -0.238914979157443,39.17459632656673,0 -0.2390710372374183,39.17435717714596,0 -0.2390977662887656,39.17422194418188,0 -0.2392148054721372,39.17404833111762,0 -0.2392472345766865,39.17368917333907,0 -0.2394215158034717,39.17330477432223,0 -0.2395482268743024,39.17296215242474,0 -0.2395902829456004,39.17266996375258,0 -0.239734615325693,39.17241573360809,0 -0.2398249393637603,39.1721511293979,0 -0.2397863011740433,39.17204295014126,0 -0.2398919646561511,39.17169029465433,0 -0.2398189271408089,39.17160036926862,0 -0.2398650493107078,39.17136071615292,0 -0.239922849187751,39.17113564153215,0 -0.2400034035582307,39.17082716343254,0 -0.2400725974201925,39.1705170655466,0 -0.2401162657691458,39.17013100355238,0 -0.2401487609247583,39.16974419201641,0 -0.2402038785121104,39.16938467863819,0 -0.2402473475753061,39.16902429004161,0 -0.2402529658644729,39.16872408601122,0 -0.2402785358696029,39.1683051743499,0 -0.24031092238858,39.16807575297895,0 -0.2403485193387526,39.16784679290867,0 -0.2403855507782836,39.16759378620081,0 -0.2404234226087713,39.16734085524102,0 -0.2404837450325479,39.16697282262221,0 -0.2404946698690346,39.16653687822779,0 -0.2405161394109217,39.16622274797376,0 -0.2405131501550522,39.16582937900478,0 -0.2405097745919371,39.16552419414209,0 -0.2404950136162311,39.1651186282153,0 -0.2404997120587357,39.16476357903166,0 -0.2404821437420007,39.1645081143244,0 -0.2405111422791266,39.1640797484984,0 -0.240478306273841,39.16366660284915,0 -0.2404517801809908,39.16344324190225,0 -0.2404284212385421,39.16321968212635,0 -0.2404470183354942,39.16286772257128,0 -0.240431418385825,39.16251658323629,0 -0.2403849097923088,39.16237484655585,0 -0.2403537097230448,39.16215481351834,0 -0.2403225372458573,39.1617774619684,0 -0.2402703121276127,39.1614687364114,0 -0.2402673272457055,39.16123512700881,0 -0.2402671504140708,39.16100146973251,0 -0.240233932731753,39.16075820963571,0 -0.2401912268109727,39.16051579402515,0 -0.240151876034968,39.16026934801706,0 -0.2400905821915766,39.15987936359657,0 -0.2399856264876144,39.1595097973826,0 -0.2398918835465937,39.15916671654681,0 -0.2398096201396867,39.15895467477662,0 -0.2397247427341707,39.15874323585087,0 -0.2396426636603086,39.15849339307422,0 -0.2395744031658852,39.15820335543267,0 -0.2395135505513206,39.15795878326397,0 -0.2395083938186896,39.15777750496488,0 -0.2394659862901557,39.15753098622329,0 -0.2394369324150538,39.15725617961771,0 -0.2394105019242895,39.15683603482826,0 -0.2393944423416677,39.15646380775777,0 -0.239375976988581,39.15607483811367,0 -0.2393273508413296,39.15584877179388,0 -0.2392680794328597,39.15562415848953,0 -0.2391976018919441,39.15531261583486,0 -0.2391383358134275,39.15502755865487,0 -0.2390892846188471,39.15463786379922,0 -0.2390517458065121,39.15425130219651,0 -0.2390136108434316,39.15397389723231,0 -0.2388973999223336,39.15368892044922,0 -0.2388328849470861,39.15333461364353,0 -0.2387529314614004,39.15306193686405,0 -0.2387066064986983,39.15283404282999,0 -0.2386777602836963,39.15260440466244,0 -0.2386684488402103,39.15234603967924,0 -0.2386759318450684,39.15208759001892,0 -0.2386938529619853,39.15181723472976,0</coordinates>
        </LineString>
      </MultiGeometry>
    </Placemark>
    <Placemark id="ID_00011">
      <name>2015</name>
      <Snippet></Snippet>
      <description><![CDATA[<html xmlns:fo="http://www.w3.org/1999/XSL/Format" xmlns:msxsl="urn:schemas-microsoft-com:xslt">

<head>

<META http-equiv="Content-Type" content="text/html">

<meta http-equiv="content-type" content="text/html; charset=UTF-8">

</head>

<body style="margin:0px 0px 0px 0px;overflow:auto;background:#FFFFFF;">

<table style="font-family:Arial,Verdana,Times;font-size:12px;text-align:left;width:100%;border-collapse:collapse;padding:3px 3px 3px 3px">

<tr style="text-align:center;font-weight:bold;background:#9CBCE2">

<td>2015</td>

</tr>

<tr>

<td>

<table style="font-family:Arial,Verdana,Times;font-size:12px;text-align:left;width:100%;border-spacing:0px; padding:3px 3px 3px 3px">

<tr>

<td>YEAR</td>

<td>2015</td>

</tr>

</table>

</td>

</tr>

</table>

</body>

</html>

]]></description>
      <styleUrl>#LineStyle010</styleUrl>
      <MultiGeometry>
        <LineString>
          <extrude>0</extrude>
          <tessellate>1</tessellate><altitudeMode>clampToGround</altitudeMode>
          <coordinates> -0.220484001223786,39.18072734269044,0 -0.2205287830407511,39.18084997625746,0 -0.2205771458287809,39.18092835970388,0 -0.2207328438945519,39.18108081357153,0 -0.2208494717019304,39.181152245389,0 -0.221067724867029,39.18125613658807,0 -0.2212173974483701,39.18132835672703,0 -0.221403585714837,39.18135997375008,0 -0.2217450893131808,39.18141388834058,0 -0.2220668706864198,39.18140869413345,0 -0.2224869657046938,39.1813801022702,0 -0.2228976971881944,39.18126261434541,0 -0.2233216164084355,39.18113685845276,0 -0.2237208802054569,39.18103053543145,0 -0.224060330501699,39.18080980228794,0 -0.2242708777754543,39.18059600590907,0 -0.2239880132082831,39.1804061999554,0 -0.2239330346422509,39.18030906842969,0 -0.2240213436375895,39.18025968790231,0 -0.2242263405254298,39.18040473153363,0 -0.2243853185456876,39.18053628331546,0 -0.2247427668823931,39.18072977237801,0 -0.2251737047425909,39.18061228136288,0 -0.2254943140122663,39.18074577632574,0 -0.2259059931684995,39.18093101996999,0 -0.2261654099587384,39.18106305514399,0 -0.2265954773937829,39.1812792449836,0 -0.2269333737283252,39.18122245854997,0 -0.227259080087526,39.18103952611384,0 -0.2273854391987883,39.18094146940076,0 -0.2276492739328903,39.18077422448686,0 -0.2278630276947807,39.18063438995235,0 -0.2280901919104211,39.18045104582828,0 -0.228306514550509,39.18025975583949,0 -0.2286182970924945,39.17999449142965,0 -0.2289197918597105,39.17986627742459,0 -0.2291338614377531,39.17965589273239,0 -0.2290933326614151,39.1793700955197,0 -0.2290872530679167,39.17909606396422,0 -0.2293412935254454,39.17905452413955,0 -0.2294451475555749,39.17909123202757,0 -0.2296749686230277,39.17922827583894,0 -0.2299196255652544,39.17936185868099,0 -0.2302818091732073,39.17962218529037,0 -0.2306873287678365,39.17983968242167,0 -0.2309394827042704,39.17996962798298,0 -0.2312394248708446,39.18009610673569,0 -0.2315422297727713,39.18021850868205,0 -0.2317660601159112,39.18032108194416,0 -0.232089971311095,39.18037073442751,0 -0.2325149907769018,39.1804037200504,0 -0.2325639660137377,39.18034195669256,0 -0.2327158229704694,39.18028073134809,0 -0.2328780312513156,39.18033035182901,0 -0.2329174757199258,39.18038658970276,0 -0.2330435836634962,39.18035716885483,0 -0.2332363808095929,39.18031407865315,0 -0.2337132308129854,39.18014997413245,0 -0.234108349130034,39.17994578858093,0 -0.234445672850665,39.17977836648032,0 -0.2346739479682977,39.17964267759292,0 -0.2350032699243826,39.17942929836747,0 -0.2354071587016902,39.17912615782942,0 -0.2357672844212918,39.17881434991616,0 -0.2361160032365111,39.17849654848535,0 -0.236372140936309,39.17829048560157,0 -0.2367037799446785,39.17795511578728,0 -0.2368775831008226,39.17773994641963,0 -0.2371067382118155,39.17751894071517,0 -0.2373001855058119,39.17734952658484,0 -0.237513946911867,39.17713053765461,0 -0.2375366878966274,39.17701904640659,0 -0.2378037486303902,39.17676978379178,0 -0.2380405264084371,39.17650898606434,0 -0.2380235848354988,39.17639416963556,0 -0.2382092459985241,39.17618881538907,0 -0.238184338156104,39.17604282283784,0 -0.2383431748133159,39.17586255264926,0 -0.2384864812239406,39.17567814456187,0 -0.2384474694526946,39.17557949022546,0 -0.2385288225268333,39.17528413683288,0 -0.238690501706684,39.17500365037734,0 -0.2387462594495001,39.17483096741678,0 -0.238914979157443,39.17459632656673,0 -0.2390710372374183,39.17435717714596,0 -0.2390977662887656,39.17422194418188,0 -0.2392148054721372,39.17404833111762,0 -0.2392472345766865,39.17368917333907,0 -0.2394215158034717,39.17330477432223,0 -0.2395482268743024,39.17296215242474,0 -0.2395902829456004,39.17266996375258,0 -0.239734615325693,39.17241573360809,0 -0.2398249393637603,39.1721511293979,0 -0.2397863011740433,39.17204295014126,0 -0.2398919646561511,39.17169029465433,0 -0.2398189271408089,39.17160036926862,0 -0.2398650493107078,39.17136071615292,0 -0.239922849187751,39.17113564153215,0 -0.2400034035582307,39.17082716343254,0 -0.2400725974201925,39.1705170655466,0 -0.2401162657691458,39.17013100355238,0 -0.2401487609247583,39.16974419201641,0 -0.2402038785121104,39.16938467863819,0 -0.2402473475753061,39.16902429004161,0 -0.2402529658644729,39.16872408601122,0 -0.2402785358696029,39.1683051743499,0 -0.24031092238858,39.16807575297895,0 -0.2403485193387526,39.16784679290867,0 -0.2403855507782836,39.16759378620081,0 -0.2404234226087713,39.16734085524102,0 -0.2404837450325479,39.16697282262221,0 -0.2404946698690346,39.16653687822779,0 -0.2405161394109217,39.16622274797376,0 -0.2405131501550522,39.16582937900478,0 -0.2405097745919371,39.16552419414209,0 -0.2404950136162311,39.1651186282153,0 -0.2404997120587357,39.16476357903166,0 -0.2404821437420007,39.1645081143244,0 -0.2405111422791266,39.1640797484984,0 -0.240478306273841,39.16366660284915,0 -0.2404517801809908,39.16344324190225,0 -0.2404284212385421,39.16321968212635,0 -0.2404470183354942,39.16286772257128,0 -0.240431418385825,39.16251658323629,0 -0.2403849097923088,39.16237484655585,0 -0.2403537097230448,39.16215481351834,0 -0.2403225372458573,39.1617774619684,0 -0.2402703121276127,39.1614687364114,0 -0.2402673272457055,39.16123512700881,0 -0.2402671504140708,39.16100146973251,0 -0.240233932731753,39.16075820963571,0 -0.2401912268109727,39.16051579402515,0 -0.240151876034968,39.16026934801706,0 -0.2400905821915766,39.15987936359657,0 -0.2399856264876144,39.1595097973826,0 -0.2398918835465937,39.15916671654681,0 -0.2398096201396867,39.15895467477662,0 -0.2397247427341707,39.15874323585087,0 -0.2396426636603086,39.15849339307422,0 -0.2395744031658852,39.15820335543267,0 -0.2395135505513206,39.15795878326397,0 -0.2395083938186896,39.15777750496488,0 -0.2394659862901557,39.15753098622329,0 -0.2394369324150538,39.15725617961771,0 -0.2394105019242895,39.15683603482826,0 -0.2393944423416677,39.15646380775777,0 -0.239375976988581,39.15607483811367,0 -0.2393273508413296,39.15584877179388,0 -0.2392680794328597,39.15562415848953,0 -0.2391976018919441,39.15531261583486,0 -0.2391383358134275,39.15502755865487,0 -0.2390892846188471,39.15463786379922,0 -0.2390517458065121,39.15425130219651,0 -0.2390136108434316,39.15397389723231,0 -0.2388973999223336,39.15368892044922,0 -0.2388328849470861,39.15333461364353,0 -0.2387529314614004,39.15306193686405,0 -0.2387066064986983,39.15283404282999,0 -0.2386777602836963,39.15260440466244,0 -0.2386684488402103,39.15234603967924,0 -0.2386759318450684,39.15208759001892,0 -0.2386938529619853,39.15181723472976,0</coordinates>
        </LineString>
      </MultiGeometry>
    </Placemark>
    <Placemark id="ID_00012">
      <name>2017</name>
      <Snippet></Snippet>
      <description><![CDATA[<html xmlns:fo="http://www.w3.org/1999/XSL/Format" xmlns:msxsl="urn:schemas-microsoft-com:xslt">

<head>

<META http-equiv="Content-Type" content="text/html">

<meta http-equiv="content-type" content="text/html; charset=UTF-8">

</head>

<body style="margin:0px 0px 0px 0px;overflow:auto;background:#FFFFFF;">

<table style="font-family:Arial,Verdana,Times;font-size:12px;text-align:left;width:100%;border-collapse:collapse;padding:3px 3px 3px 3px">

<tr style="text-align:center;font-weight:bold;background:#9CBCE2">

<td>2017</td>

</tr>

<tr>

<td>

<table style="font-family:Arial,Verdana,Times;font-size:12px;text-align:left;width:100%;border-spacing:0px; padding:3px 3px 3px 3px">

<tr>

<td>YEAR</td>

<td>2017</td>

</tr>

</table>

</td>

</tr>

</table>

</body>

</html>

]]></description>
      <styleUrl>#LineStyle012</styleUrl>
      <MultiGeometry>
        <LineString>
          <extrude>0</extrude>
          <tessellate>1</tessellate><altitudeMode>clampToGround</altitudeMode>
          <coordinates> -0.2205390308816669,39.18062800422228,0 -0.220564485780646,39.18072038121453,0 -0.2206020569935496,39.18077729283952,0 -0.2206943552856599,39.18088318331531,0 -0.2207946516583102,39.18094159213972,0 -0.2209247658498807,39.18098164431271,0 -0.2210654961448769,39.1810243325783,0 -0.2213359360346275,39.18107845941999,0 -0.221475822428086,39.18114257999211,0 -0.2216545177386044,39.18119332391238,0 -0.2218810621503929,39.18123448414542,0 -0.2220412776637537,39.18124903284281,0 -0.2222936303754291,39.18121810784928,0 -0.2225971741304317,39.18117052523065,0 -0.2228850884281198,39.18113091308941,0 -0.2231365680068625,39.18108327910517,0 -0.2235371648084425,39.18098199476355,0 -0.2239042910991595,39.18087514347689,0 -0.2240880501799728,39.18079728941404,0 -0.2242187310930452,39.18070625267454,0 -0.2242830821669517,39.18058860593825,0 -0.2239389934207637,39.18038256205805,0 -0.2239225086208599,39.18033449649847,0 -0.2239282232577681,39.18030602941765,0 -0.2240006596252145,39.18025531731742,0 -0.2240867363638883,39.1802859728509,0 -0.2242654925047521,39.18041299006525,0 -0.2245129370382637,39.18058455029455,0 -0.2247433819675045,39.18072114207513,0 -0.224972285523678,39.18066343272355,0 -0.2252019691972514,39.18062480979857,0 -0.2253124326486901,39.18065842936836,0 -0.225485134752838,39.1807447792205,0 -0.2257253489238145,39.1808514823316,0 -0.2259668254693411,39.18095647991046,0 -0.2262193497413256,39.18107691031545,0 -0.2263613163747308,39.1811661023154,0 -0.226523937440177,39.18119738757856,0 -0.2266922393994819,39.18116206709605,0 -0.2268966646560127,39.18110377000569,0 -0.2270648407005838,39.18103269134749,0 -0.2271858716433544,39.18095333932251,0 -0.2273997538994918,39.1807713181079,0 -0.2275954638372595,39.18058409715751,0 -0.2278391607522654,39.18038371671138,0 -0.2279960315902401,39.18028853167483,0 -0.228203761440818,39.180185022115,0 -0.2283645335111575,39.18006847647196,0 -0.2285356392269575,39.1799617116214,0 -0.2287996127726226,39.17982974447543,0 -0.2290675658792946,39.17971336588463,0 -0.229172825171256,39.17964555339947,0 -0.229145123007462,39.17945420478692,0 -0.2293754421477121,39.17943823350742,0 -0.229545789510016,39.17950664400272,0 -0.2296998233862315,39.17956155721117,0 -0.2298877010600472,39.17961250787769,0 -0.2301112798727279,39.17965119684975,0 -0.2303337965327448,39.17967794311044,0 -0.2305807107964213,39.17966832270952,0 -0.2307938282416663,39.17966147363263,0 -0.2308427363363774,39.17966382870294,0 -0.2308391834681254,39.17975432183938,0 -0.2308107657876784,39.17989308717255,0 -0.2307967380871561,39.17997737176792,0 -0.2308235142054271,39.18003640720825,0 -0.2309502938641657,39.18008352019481,0 -0.2311388283845751,39.18011779813451,0 -0.2313268613996649,39.18012584514095,0 -0.2314859199033679,39.18013081914206,0 -0.231678916768011,39.18012944945069,0 -0.2319688560649244,39.18011608153581,0 -0.232088980297307,39.18009867612783,0 -0.2322269009239038,39.1800959962239,0 -0.2324153546355834,39.18009332452893,0 -0.2326020926605909,39.18009537927952,0 -0.2328754357791961,39.18007565613026,0 -0.2330568947638698,39.18005613260719,0 -0.2332024765916512,39.18001430328233,0 -0.2333380389701493,39.17999368778023,0 -0.2335759270475417,39.1799409414756,0 -0.2337934227730468,39.17986149059085,0 -0.2339816655765811,39.17978611189587,0 -0.2341292899622241,39.17973121920743,0 -0.2343382128705493,39.17963607006495,0 -0.2345495988724056,39.17951714318394,0 -0.234756582261286,39.1793933429167,0 -0.2349565708323429,39.1792760508859,0 -0.235138767415918,39.17919075379356,0 -0.2352719629380103,39.17913670978004,0 -0.235396441030199,39.17908627211307,0 -0.2355594571710469,39.1790214944535,0 -0.2356757499225662,39.17892986424357,0 -0.2358407150349581,39.1787840888945,0 -0.2359866567102787,39.17862356001469,0 -0.23610854538979,39.17854541074405,0 -0.2362055070885584,39.17847811012123,0 -0.236360081565695,39.17834734310922,0 -0.2365316114143167,39.178190281189,0 -0.2366037972299725,39.17813002006733,0 -0.2367380200005609,39.17795586441158,0 -0.2368786297249481,39.17774372168122,0 -0.2370159774359747,39.17752101404341,0 -0.2371493025575559,39.17736971839739,0 -0.2372642320883955,39.17721894016009,0 -0.2373764222451815,39.1770442609298,0 -0.2374606728780952,39.17692612552687,0 -0.2375669960548719,39.17677609592074,0 -0.2377063698253971,39.17659538653016,0 -0.237790491388098,39.17638667002481,0 -0.2379531235098363,39.17617504830039,0 -0.2381032735751243,39.17593023677802,0 -0.2382548206869914,39.17569666080786,0 -0.2384289096423181,39.17539568634533,0 -0.238596769044539,39.17517560658945,0 -0.2386993981558189,39.17497900745435,0 -0.2387906745048659,39.17475949499695,0 -0.2388427346454982,39.17452475080353,0 -0.238868230159994,39.17430367836565,0 -0.2389296855649695,39.17414185735917,0 -0.2390338498570015,39.17390596568437,0 -0.2391077067214667,39.17362287358699,0 -0.2391567141804174,39.1733487264168,0 -0.2391816876173063,39.17318008171014,0 -0.239242131732719,39.17296579718535,0 -0.239325047719735,39.17280329285015,0 -0.239398700191284,39.17260362219517,0 -0.2395182580769833,39.1723263807696,0 -0.2396547824659126,39.17204596575091,0 -0.2397367720956256,39.17186794641245,0 -0.2398044894510269,39.17166336811724,0 -0.2398723524327425,39.1714158871572,0 -0.2399351620064237,39.17118020611526,0 -0.2399868497352826,39.17091565706104,0 -0.2400291817628823,39.17061632334279,0 -0.2400375118934283,39.17044251632574,0 -0.2400683988348916,39.17035743716517,0 -0.2401425979093332,39.17018280756805,0 -0.2401993710615754,39.16998392899866,0 -0.2402466548915562,39.16971450784617,0 -0.2402671898989026,39.16946352198181,0 -0.2402775134290658,39.16927784420035,0 -0.2403127245975323,39.16912135970003,0 -0.2403610034650195,39.16898306136362,0 -0.2404260754242443,39.16876769380789,0 -0.2404438000591361,39.1686668098709,0 -0.2404528527149329,39.16859194010362,0 -0.2404352238568746,39.16841632502045,0 -0.2404249712039363,39.16820870652182,0 -0.2404296023894937,39.16797283728323,0 -0.2404500822963788,39.16776237232927,0 -0.2404661581050201,39.16754703455081,0 -0.2404450589373342,39.16734273464643,0 -0.2404360565031147,39.16714229706503,0 -0.2404424278456718,39.16701849911311,0 -0.2404505301514436,39.16681131555858,0 -0.240468548509187,39.16662462815093,0 -0.2404535134922687,39.16646099336037,0 -0.2404818657358512,39.16628408502149,0 -0.2404802378680432,39.16605164305011,0 -0.2404548361727285,39.16580076029086,0 -0.2404697482620608,39.16561519022815,0 -0.2404881770904793,39.16545711598057,0 -0.2405059556759151,39.16526088775551,0 -0.2405158519383081,39.16507043216404,0 -0.2405340595408167,39.16485538354492,0 -0.2405497341507998,39.1647051097305,0 -0.2405608113427309,39.16454709997382,0 -0.2405732411917777,39.16429186955196,0 -0.2405791367959804,39.1640784363444,0 -0.2405830328503291,39.16385351345643,0 -0.2405432393887935,39.16368094962586,0 -0.2404817190903851,39.16350024302042,0 -0.2404649193953657,39.16330343406674,0 -0.2404186701290939,39.16316289543952,0 -0.2403798286170294,39.16290335178313,0 -0.2403623481913656,39.16268483577532,0 -0.2403230277161907,39.16251585782539,0 -0.2402524730821824,39.16232349559736,0 -0.240270676365933,39.16213204493744,0 -0.2403264239413065,39.16192003095138,0 -0.2403509836183262,39.16168344190218,0 -0.2403344196849934,39.16151977077289,0 -0.2402856907344109,39.16135652926313,0 -0.2402559139085843,39.16121757371526,0 -0.2402342505859509,39.1610668915715,0 -0.2402273149811909,39.16097018976591,0 -0.2401974452655505,39.16083361577186,0 -0.2401648922683219,39.16070301598955,0 -0.2400852230462838,39.16042137583129,0 -0.2399970308414938,39.1601412678407,0 -0.2398955859210956,39.15983852684096,0 -0.2399244761469048,39.15949120126996,0 -0.2398994103697057,39.15919265340143,0 -0.2398462711729498,39.15882908272015,0 -0.239720730131269,39.15851623532077,0 -0.2397148420698646,39.15827534894203,0 -0.2397115756474413,39.15788912345057,0 -0.2396268109673909,39.15762968279225,0 -0.2395772765568071,39.15741582385436,0 -0.2395405771306887,39.1572003727492,0 -0.2395082002000348,39.15694789450065,0 -0.2395088111486071,39.15665043170628,0 -0.2395032104819337,39.15655876775023,0 -0.2393857615410654,39.15622704248155,0 -0.2393100025134298,39.15600356898086,0 -0.2392825999671103,39.15562392254036,0 -0.2393247418620415,39.15539180257193,0 -0.2393898475681529,39.15518310974646,0 -0.2394447227825581,39.15495415190991,0 -0.2394672266824432,39.1547544599232,0 -0.2394129240271739,39.15459299306076,0 -0.2393736464033252,39.15437610505921,0 -0.2393408063745763,39.15422944868984,0 -0.2393495228600694,39.15400654706298,0 -0.2393143070810616,39.15377974454111,0 -0.2393175267148498,39.15350951725747,0 -0.2393342063403375,39.1532238766586,0 -0.2392933091231539,39.1530484257509,0 -0.2393368935704646,39.15282635065541,0 -0.2392829824132651,39.15265488131354,0 -0.2392800265923289,39.15240166970564,0 -0.2393488074071353,39.15214586856164,0 -0.2393365542081617,39.15194249224121,0</coordinates>
        </LineString>
      </MultiGeometry>
    </Placemark>
    <Placemark id="ID_00013">
      <name>2018</name>
      <Snippet></Snippet>
      <description><![CDATA[<html xmlns:fo="http://www.w3.org/1999/XSL/Format" xmlns:msxsl="urn:schemas-microsoft-com:xslt">

<head>

<META http-equiv="Content-Type" content="text/html">

<meta http-equiv="content-type" content="text/html; charset=UTF-8">

</head>

<body style="margin:0px 0px 0px 0px;overflow:auto;background:#FFFFFF;">

<table style="font-family:Arial,Verdana,Times;font-size:12px;text-align:left;width:100%;border-collapse:collapse;padding:3px 3px 3px 3px">

<tr style="text-align:center;font-weight:bold;background:#9CBCE2">

<td>2018</td>

</tr>

<tr>

<td>

<table style="font-family:Arial,Verdana,Times;font-size:12px;text-align:left;width:100%;border-spacing:0px; padding:3px 3px 3px 3px">

<tr>

<td>YEAR</td>

<td>2018</td>

</tr>

</table>

</td>

</tr>

</table>

</body>

</html>

]]></description>
      <styleUrl>#LineStyle013</styleUrl>
      <MultiGeometry>
        <LineString>
          <extrude>0</extrude>
          <tessellate>1</tessellate><altitudeMode>clampToGround</altitudeMode>
          <coordinates> -0.2204332885786876,39.18088343496411,0 -0.2204434635517992,39.18093611697439,0 -0.2204312522083671,39.1809739629072,0 -0.2204705880032775,39.18102495820056,0 -0.2205568331291306,39.18109018307025,0 -0.2206560219907267,39.18113783955961,0 -0.2208385088836653,39.18120893629168,0 -0.2209737764999252,39.18123480976578,0 -0.2211563290920718,39.18126538635997,0 -0.2213835770478172,39.18128868705519,0 -0.2215708606382728,39.18131580026508,0 -0.2217601433963469,39.18133104297866,0 -0.2220282943950936,39.18132671509314,0 -0.2222226537920378,39.18129083093845,0 -0.2224765083151473,39.18122180301508,0 -0.2226595183810598,39.18116300255944,0 -0.2228764675927426,39.18109786094214,0 -0.2231514281549519,39.18099834785256,0 -0.2233650522223805,39.18090094703906,0 -0.223738517953509,39.18071082122403,0 -0.2240691629483063,39.18048034302581,0 -0.2240735819182842,39.18044588564439,0 -0.2239492281683334,39.18037618001573,0 -0.2239240803229809,39.18031479812304,0 -0.2239845582962012,39.18025664963019,0 -0.2240470954045534,39.18026290724641,0 -0.2243259158701338,39.18045428509976,0 -0.2245328037959379,39.18060580925729,0 -0.2247459680424034,39.18071457765181,0 -0.2249532190487878,39.18066231073794,0 -0.2251036316431285,39.18061464736803,0 -0.2251952361096727,39.18062159801506,0 -0.225383612324811,39.18069878740946,0 -0.2256646804856125,39.18083619184271,0 -0.2259487268309817,39.18096968371669,0 -0.2262115068809148,39.18106294612431,0 -0.2263840249693144,39.18115405780116,0 -0.2266433855107003,39.18110064543175,0 -0.2269494545358424,39.18098875447627,0 -0.2271340054795571,39.18089065424203,0 -0.2272786398000953,39.18079517879189,0 -0.2275296593785038,39.18060331566809,0 -0.2277616640091519,39.18042768468271,0 -0.2279461019027194,39.18025449640358,0 -0.2281146310182809,39.18009642264438,0 -0.2284484596765746,39.1798624328055,0 -0.2286516913540095,39.17975643158,0 -0.2288611368997596,39.17964819501771,0 -0.2290237959228478,39.17956148857771,0 -0.2291431051334306,39.17948686009295,0 -0.2293287532662091,39.17928271120106,0 -0.2295415608540163,39.1793616671257,0 -0.2297427864524078,39.17942366165732,0 -0.2299165201905653,39.17948381081116,0 -0.2302410092532083,39.17956542241541,0 -0.230514185710163,39.17962793529413,0 -0.2307075879403815,39.17965517930878,0 -0.2308088858947697,39.17964924627095,0 -0.2308511484023288,39.17970388249303,0 -0.2308141204764541,39.17994493950381,0 -0.2307952647779723,39.18019119531851,0 -0.2308971318879031,39.18028777129789,0 -0.231117139343439,39.18033948413016,0 -0.2315254625287367,39.18039209867312,0 -0.2316266324952879,39.18035040722886,0 -0.2318454045559019,39.18035560861444,0 -0.2319638936676223,39.18037987764274,0 -0.2322085795125374,39.18038807816664,0 -0.2324414462133145,39.18038527120373,0 -0.2327661179372525,39.18034531537807,0 -0.2331742902621226,39.18028469892872,0 -0.2334230281473616,39.18022863512802,0 -0.233700518049814,39.18014226675005,0 -0.2341055213613841,39.17996715817965,0 -0.2343260873711312,39.1798484488961,0 -0.2347409780718591,39.17961636524264,0 -0.2350976381778957,39.17938528198886,0 -0.2353317004483276,39.17923471218866,0 -0.2356424974929946,39.17904067577231,0 -0.2359115768436667,39.17881704386449,0 -0.2361237140989728,39.17863973319936,0 -0.2363747589626817,39.17840732979571,0 -0.2365675297700788,39.178177118444,0 -0.2368153904217681,39.17786955430199,0 -0.2370153961207234,39.1776109104417,0 -0.2372261187796247,39.17731319013637,0 -0.2373802266470015,39.17705345653806,0 -0.2375239893607701,39.17682327257086,0 -0.2376492360289461,39.17667488372544,0 -0.2377832203323325,39.17642063154538,0 -0.2378855739289632,39.17623117797918,0 -0.238124074182723,39.17584949645444,0 -0.2383119879885436,39.17550832783989,0 -0.2384466774232665,39.17524066998757,0 -0.2385749463643954,39.17497109844122,0 -0.2386518414620658,39.17480606811834,0 -0.2387632154157351,39.17446427628897,0 -0.2388277639963457,39.17424413716171,0 -0.2388922236609768,39.17402398146457,0 -0.2389741872406752,39.17376849324284,0 -0.2390891436593877,39.17356980312498,0 -0.2392603512489545,39.17326399136667,0 -0.2393866514197797,39.17289275647374,0 -0.2394488038969625,39.17247828736038,0 -0.2395272844315395,39.17223344304088,0 -0.2396070146593231,39.17199577868912,0 -0.2396425790561323,39.17178071039529,0 -0.2396667573850926,39.17156456676717,0 -0.2397166716396233,39.17127550929072,0 -0.2397674580159408,39.17098654181923,0 -0.239808578739019,39.17071816669959,0 -0.2398257916369282,39.17039559360153,0 -0.2398681301214341,39.17005693056146,0 -0.2399166655306075,39.16979469054178,0 -0.2399976106623231,39.16948673784908,0 -0.240049810059802,39.16920909007564,0 -0.2401067832443618,39.16892678966837,0 -0.2401597411706173,39.16855143146772,0 -0.2402020704210315,39.16825209840199,0 -0.2402202974365541,39.1680124090875,0 -0.2402361343135077,39.16777260455622,0 -0.2402740191484776,39.16743025999818,0 -0.2403124098487013,39.16711414798806,0 -0.2403378642031299,39.16681560585813,0 -0.2403729084205147,39.16654589444148,0 -0.2404115168721178,39.16630248806277,0 -0.2404384999762972,39.16600398209894,0 -0.2404727326887534,39.16559838535604,0 -0.2404928843222146,39.16539625394172,0 -0.2404894155935978,39.16509345152814,0 -0.2404763362267858,39.16487980652869,0 -0.2404632034365215,39.1647066825935,0 -0.2404458691940107,39.16444526489617,0 -0.2404428046312761,39.16421040505027,0 -0.2404419089563015,39.16403757019014,0 -0.2404620530937699,39.1638747690122,0 -0.2404513346091686,39.16367905822504,0 -0.240437384433053,39.16340937748216,0 -0.2404336690656231,39.16319118769453,0 -0.2404217606830183,39.16290844546719,0 -0.2403841160947752,39.16269660203498,0 -0.2403608432529827,39.16246960554547,0 -0.2403503578418001,39.16226794080808,0 -0.2403481256120758,39.16205097802325,0 -0.240326639664713,39.16177825828519,0 -0.2403170665145441,39.16150629742457,0 -0.2402710644172794,39.1612263228193,0 -0.2402277288076085,39.16097215452007,0 -0.2401640184967795,39.16081618580674,0 -0.2400900239175906,39.16064138060368,0 -0.2400176032343538,39.16037937157231,0 -0.2399779772176266,39.16021825287271,0 -0.2399648681718493,39.16013070108712,0 -0.2399463164202402,39.15999439437126,0 -0.2398889692857983,39.15972273174265,0 -0.2398244967713001,39.15949237570349,0 -0.2398108077385907,39.15923175858641,0 -0.2398018246101171,39.15908566786483,0 -0.2397494515292265,39.15868683705964,0 -0.239707115413641,39.15845414438215,0 -0.2396960264695946,39.15826795883664,0 -0.2396269910664424,39.15806037730722,0 -0.2395615148512921,39.1578557395525,0 -0.2394842066872434,39.15757788282495,0 -0.2394737970525768,39.15732735503337,0 -0.2395102842906325,39.15700499954634,0 -0.2395568012254376,39.15679801198163,0 -0.239618011729198,39.15660281317901,0 -0.2397499062552194,39.15636161693681,0 -0.2398122965104805,39.15603832660866,0 -0.2397913886192101,39.15569220434469,0 -0.2398054721079738,39.15533201417999,0 -0.2397823516569383,39.15504245096165,0 -0.2397131194151107,39.1547577542162,0 -0.2396685655038316,39.15446827842727,0 -0.2396451404058789,39.1542296392994,0 -0.2396290744057267,39.15399061693855,0 -0.2396191182747337,39.15376149701783,0 -0.2396071903177562,39.15353244116204,0 -0.2395897990417743,39.15335087276398,0 -0.2395638833224779,39.15315241676959,0 -0.2395768109590076,39.15290005823956,0 -0.2395705745945921,39.15267106429379,0 -0.2395210970869575,39.15244584806169,0 -0.2393246624507664,39.15214562142385,0 -0.2391521880661743,39.15209385990834,0 -0.2390295824158729,39.15201944447065,0 -0.2390032028761386,39.15183289622669,0</coordinates>
        </LineString>
      </MultiGeometry>
    </Placemark>
    <Placemark id="ID_00014">
      <name>2019</name>
      <Snippet></Snippet>
      <description><![CDATA[<html xmlns:fo="http://www.w3.org/1999/XSL/Format" xmlns:msxsl="urn:schemas-microsoft-com:xslt">

<head>

<META http-equiv="Content-Type" content="text/html">

<meta http-equiv="content-type" content="text/html; charset=UTF-8">

</head>

<body style="margin:0px 0px 0px 0px;overflow:auto;background:#FFFFFF;">

<table style="font-family:Arial,Verdana,Times;font-size:12px;text-align:left;width:100%;border-collapse:collapse;padding:3px 3px 3px 3px">

<tr style="text-align:center;font-weight:bold;background:#9CBCE2">

<td>2019</td>

</tr>

<tr>

<td>

<table style="font-family:Arial,Verdana,Times;font-size:12px;text-align:left;width:100%;border-spacing:0px; padding:3px 3px 3px 3px">

<tr>

<td>YEAR</td>

<td>2019</td>

</tr>

</table>

</td>

</tr>

</table>

</body>

</html>

]]></description>
      <styleUrl>#LineStyle014</styleUrl>
      <MultiGeometry>
        <LineString>
          <extrude>0</extrude>
          <tessellate>1</tessellate><altitudeMode>clampToGround</altitudeMode>
          <coordinates> -0.2203536045745711,39.18091513232405,0 -0.2203933098914562,39.18102667999239,0 -0.2204540249779792,39.18110249804317,0 -0.2206686954536226,39.18125063914003,0 -0.2209444423247025,39.18134112474404,0 -0.2212187914720244,39.18140487931532,0 -0.2216795511152604,39.18146354739354,0 -0.2222192705062466,39.18144591444935,0 -0.2225554736483368,39.18137003122383,0 -0.223026830670894,39.18128402295684,0 -0.2233087701982646,39.18115152942939,0 -0.223567556724163,39.18099181579389,0 -0.2239872868240361,39.18072341745916,0 -0.2241722999417513,39.18050472151628,0 -0.2240696706595252,39.18043553393348,0 -0.2239350690473533,39.18036939744423,0 -0.2239408915252637,39.18028372626925,0 -0.2240277627838191,39.18025528693458,0 -0.2242336980320551,39.18037651711408,0 -0.2243672491819724,39.18046932436394,0 -0.2247274194792045,39.18071817874027,0 -0.2249030858951534,39.18067469321578,0 -0.2252091599653228,39.18061715331089,0 -0.2253459116875001,39.18069096743731,0 -0.2256832069494881,39.18083630085439,0 -0.2260971843037524,39.18102541297117,0 -0.2264775693364754,39.18119656054015,0 -0.2266586328638477,39.18120277975543,0 -0.2268624246231609,39.18112945155826,0 -0.2272715797851933,39.1809427859153,0 -0.2274935928420318,39.18079202003465,0 -0.2276956903066795,39.1806248985833,0 -0.2279398891274046,39.18039616526063,0 -0.2281481696122066,39.18020852730989,0 -0.2284029201933697,39.17991105827417,0 -0.2286758422470096,39.17962423007459,0 -0.2290177938407264,39.17940163448147,0 -0.2291170513516942,39.17936967259401,0 -0.2292562555423778,39.17900686130991,0 -0.2295437740863419,39.17917197543176,0 -0.2297865822167647,39.17929025883024,0 -0.2301287967560313,39.17937276903263,0 -0.2303325386874116,39.1794252882552,0 -0.2304634456263105,39.17946081895151,0 -0.2307296528044832,39.17948240642445,0 -0.230955798208857,39.17952592234493,0 -0.231354145437575,39.17967650569811,0 -0.2315372594956535,39.17975522850525,0 -0.2317900684470632,39.17993095320774,0 -0.2319097458242471,39.18006537396986,0 -0.2321501877774782,39.18018168995638,0 -0.2325352936776563,39.18023279588596,0 -0.2328991923183693,39.18026242013956,0 -0.2331909281652391,39.18025791162525,0 -0.2336350430887016,39.18017884058171,0 -0.2339367370434673,39.18010782495882,0 -0.2341016527168518,39.1800259324939,0 -0.2343008376854968,39.17994485380101,0 -0.2345794132597645,39.17977603583482,0 -0.2348156123386939,39.17968820747992,0 -0.2350790510170651,39.17953047015596,0 -0.2352591160584435,39.17937456693501,0 -0.2355161065125549,39.17919379276038,0 -0.2357760063113185,39.1789387182378,0 -0.2360814411270726,39.1787095139203,0 -0.2363737550987948,39.17843995258396,0 -0.2366674102582906,39.17813609822192,0 -0.2368451852251542,39.17791339620167,0 -0.2370185852461192,39.17767724151759,0 -0.237268026607617,39.17737614984639,0 -0.2374032908450834,39.17717532096206,0 -0.2375404941059188,39.17692495896184,0 -0.237637846678743,39.17675374092648,0 -0.2377762888393643,39.1765968461265,0 -0.2379176248854397,39.17642857753123,0 -0.238018705493147,39.17616210315784,0 -0.2381585150772958,39.17584506025635,0 -0.2383074898573366,39.17566934534822,0 -0.2384411342960027,39.17538457364596,0 -0.2385063811038957,39.1751551648781,0 -0.2385742200342661,39.17492625987494,0 -0.2387226965804514,39.17463802605217,0 -0.2388829001902579,39.17430049022075,0 -0.2390205395040949,39.17403869431414,0 -0.2391033738767124,39.17373746205472,0 -0.2391586342072393,39.17351183583388,0 -0.2392141265233861,39.17328624570653,0 -0.2393306535168263,39.17287521092211,0 -0.2394121563546967,39.17254534335716,0 -0.2394877946398478,39.17224012572552,0 -0.2395433433524326,39.17200031607571,0 -0.2395972109758567,39.17176027374312,0 -0.239686290080192,39.17136193634637,0 -0.2397468729936234,39.17113632509377,0 -0.2398092702421339,39.17091100905662,0 -0.2398696876854213,39.17068297849265,0 -0.2399251309872955,39.17045419304893,0 -0.2399733634828766,39.1702135466244,0 -0.2400125895715946,39.16997191282513,0 -0.2400495096615816,39.16965433555896,0 -0.240094888242573,39.16930835529074,0 -0.2401534739899538,39.16893789804681,0 -0.2401893370151113,39.16870992038822,0 -0.240197202361503,39.16846793417417,0 -0.2402009216284596,39.16822584157899,0 -0.2402411057179101,39.16788736594575,0 -0.2402665829640381,39.1676743969561,0 -0.2403077751073695,39.16749803083898,0 -0.240340892006473,39.16727761588388,0 -0.2403680077734229,39.16702273363376,0 -0.2404169882261415,39.16683511064312,0 -0.2404561162010515,39.16658623371445,0 -0.2404705478833147,39.16634249310816,0 -0.2405055249129321,39.16607444849398,0 -0.2405011965451202,39.16580928681896,0 -0.2405351949963388,39.16562893658919,0 -0.2405500718752976,39.16537376419735,0 -0.2405429230944752,39.16511806985263,0 -0.2405487563571448,39.16484361475415,0 -0.2405489492987517,39.1645880943685,0 -0.2405283100154353,39.16430156964108,0 -0.2405318219600981,39.16414910039863,0 -0.2405194692019666,39.16396383823513,0 -0.2405071069539804,39.16384150348899,0 -0.2405152149479329,39.1636967710451,0 -0.2404948512922163,39.16352848112097,0 -0.2404761372621259,39.16325535056357,0 -0.2404803088639801,39.1631486634009,0 -0.2405037715571279,39.16298713271967,0 -0.2405008249878855,39.16287455527535,0 -0.2405138906170583,39.16279096165093,0 -0.240527180872232,39.16270165174971,0 -0.2405265955656103,39.16265396511212,0 -0.240517414090556,39.16257556499369,0 -0.2405133501246768,39.16249156454589,0 -0.2404898686714768,39.16234036280528,0 -0.2404782396938713,39.16226190468291,0 -0.2404466612728912,39.16219250800464,0 -0.2404412565445113,39.16214279995729,0 -0.2404399370054329,39.1620512375446,0 -0.2404307557012061,39.16197283651832,0 -0.2403966553855569,39.16190528726251,0 -0.2403867505731387,39.16172008304972,0 -0.2403543225343122,39.16142183743924,0 -0.2403443326296422,39.16130146606262,0 -0.2403033489740636,39.16115938369432,0 -0.2402902423704298,39.16105610054073,0 -0.2402835183907523,39.1609148300623,0 -0.2402964466717022,39.16077211901225,0 -0.2403065667817996,39.16057594793212,0 -0.2402892356471586,39.16045540256483,0 -0.2402104511259039,39.16021517246887,0 -0.2401339644478894,39.15997881027477,0 -0.2400606706425724,39.15972345530896,0 -0.2400388932407717,39.15959136312465,0 -0.2400201582034124,39.15944408724552,0 -0.2399747413524373,39.1592275306024,0 -0.239947260786605,39.15905335113828,0 -0.2399275696466555,39.15886791488824,0 -0.2399176769593964,39.15861978318463,0 -0.2398699513931514,39.15846228595399,0 -0.2397318440754981,39.15823590524655,0 -0.2396692246037089,39.15802084701649,0 -0.2396410868723053,39.15780088629884,0 -0.2396314074907489,39.15760996659657,0 -0.2395915445184297,39.15743930701984,0 -0.2395055110207298,39.15713407059948,0 -0.2394774597423867,39.15684927698228,0 -0.2394505149287947,39.15659883377691,0 -0.2394222404484681,39.15631975554029,0 -0.2394090203939773,39.15603149995976,0 -0.2394069296394465,39.15570918308899,0 -0.2394178584788476,39.15547581416201,0 -0.2394227363101155,39.15524236665146,0 -0.2393895054385369,39.15490214946406,0 -0.2393732309099928,39.15469200493789,0 -0.2393820964239588,39.15446529335394,0 -0.2393524516202876,39.15415949074988,0 -0.2393166064301951,39.15385400780973,0 -0.2393144969207264,39.15353216788169,0 -0.2392908591749983,39.15324414180989,0 -0.2392350015568824,39.15307548666137,0 -0.2391308334934102,39.15282702698912,0 -0.2390428735720266,39.15244594380513,0 -0.2389800854417014,39.15217272185411,0 -0.2389097529080274,39.1520923942577,0 -0.2389112235738912,39.15196085296675,0 -0.2389458855832734,39.1518730029663,0</coordinates>
        </LineString>
      </MultiGeometry>
    </Placemark>
  </Folder>
  <Folder id="FeatureLayer1">
    <name>Transects_Width</name>
    <Snippet></Snippet>
    <Placemark id="ID_10000">
      <name>San Antonio</name>
      <Snippet></Snippet>
      <description><![CDATA[<html xmlns:fo="http://www.w3.org/1999/XSL/Format" xmlns:msxsl="urn:schemas-microsoft-com:xslt">

<head>

<META http-equiv="Content-Type" content="text/html">

<meta http-equiv="content-type" content="text/html; charset=UTF-8">

</head>

<body style="margin:0px 0px 0px 0px;overflow:auto;background:#FFFFFF;">

<table style="font-family:Arial,Verdana,Times;font-size:12px;text-align:left;width:100%;border-collapse:collapse;padding:3px 3px 3px 3px">

<tr style="text-align:center;font-weight:bold;background:#9CBCE2">

<td>San Antonio</td>

</tr>

<tr>

<td>

<table style="font-family:Arial,Verdana,Times;font-size:12px;text-align:left;width:100%;border-spacing:0px; padding:3px 3px 3px 3px">

<tr>

<td>ID_Transecto</td>

<td>1</td>

</tr>

<tr bgcolor="#D4E4F3">

<td>Name</td>

<td>San Antonio</td>

</tr>

<tr>

<td>Y_1956</td>

<td>28</td>

</tr>

<tr bgcolor="#D4E4F3">

<td>Y_1977</td>

<td>131</td>

</tr>

<tr>

<td>Y_1985</td>

<td>154</td>

</tr>

<tr bgcolor="#D4E4F3">

<td>Y_1989</td>

<td>146</td>

</tr>

<tr>

<td>Y_2000</td>

<td>161</td>

</tr>

<tr bgcolor="#D4E4F3">

<td>Y_2004</td>

<td>139</td>

</tr>

<tr>

<td>Y_2006</td>

<td>153</td>

</tr>

<tr bgcolor="#D4E4F3">

<td>Y_2008</td>

<td>134</td>

</tr>

<tr>

<td>Y_2010</td>

<td>125</td>

</tr>

<tr bgcolor="#D4E4F3">

<td>Y_2012</td>

<td>153</td>

</tr>

<tr>

<td>Y_2015</td>

<td>173</td>

</tr>

<tr bgcolor="#D4E4F3">

<td>Y_2017</td>

<td>121</td>

</tr>

<tr>

<td>Y_2018</td>

<td>96</td>

</tr>

<tr bgcolor="#D4E4F3">

<td>Y_2019</td>

<td>138</td>

</tr>

</table>

</td>

</tr>

</table>

</body>

</html>

]]></description>
      <styleUrl>#LineStyle10</styleUrl>
      <MultiGeometry>
        <LineString>
          <extrude>0</extrude>
          <tessellate>1</tessellate><altitudeMode>clampToGround</altitudeMode>
          <coordinates> -0.238300835967051,39.15258895061058,0 -0.2406757433620282,39.1526534562412,0</coordinates>
        </LineString>
      </MultiGeometry>
    </Placemark>
    <Placemark id="ID_10001">
      <name>San Antonio</name>
      <Snippet></Snippet>
      <description><![CDATA[<html xmlns:fo="http://www.w3.org/1999/XSL/Format" xmlns:msxsl="urn:schemas-microsoft-com:xslt">

<head>

<META http-equiv="Content-Type" content="text/html">

<meta http-equiv="content-type" content="text/html; charset=UTF-8">

</head>

<body style="margin:0px 0px 0px 0px;overflow:auto;background:#FFFFFF;">

<table style="font-family:Arial,Verdana,Times;font-size:12px;text-align:left;width:100%;border-collapse:collapse;padding:3px 3px 3px 3px">

<tr style="text-align:center;font-weight:bold;background:#9CBCE2">

<td>San Antonio</td>

</tr>

<tr>

<td>

<table style="font-family:Arial,Verdana,Times;font-size:12px;text-align:left;width:100%;border-spacing:0px; padding:3px 3px 3px 3px">

<tr>

<td>ID_Transecto</td>

<td>2</td>

</tr>

<tr bgcolor="#D4E4F3">

<td>Name</td>

<td>San Antonio</td>

</tr>

<tr>

<td>Y_1956</td>

<td>17</td>

</tr>

<tr bgcolor="#D4E4F3">

<td>Y_1977</td>

<td>101</td>

</tr>

<tr>

<td>Y_1985</td>

<td>111</td>

</tr>

<tr bgcolor="#D4E4F3">

<td>Y_1989</td>

<td>128</td>

</tr>

<tr>

<td>Y_2000</td>

<td>115</td>

</tr>

<tr bgcolor="#D4E4F3">

<td>Y_2004</td>

<td>128</td>

</tr>

<tr>

<td>Y_2006</td>

<td>128</td>

</tr>

<tr bgcolor="#D4E4F3">

<td>Y_2008</td>

<td>110</td>

</tr>

<tr>

<td>Y_2010</td>

<td>114</td>

</tr>

<tr bgcolor="#D4E4F3">

<td>Y_2012</td>

<td>139</td>

</tr>

<tr>

<td>Y_2015</td>

<td>143</td>

</tr>

<tr bgcolor="#D4E4F3">

<td>Y_2017</td>

<td>115</td>

</tr>

<tr>

<td>Y_2018</td>

<td>91</td>

</tr>

<tr bgcolor="#D4E4F3">

<td>Y_2019</td>

<td>116</td>

</tr>

</table>

</td>

</tr>

</table>

</body>

</html>

]]></description>
      <styleUrl>#LineStyle10</styleUrl>
      <MultiGeometry>
        <LineString>
          <extrude>0</extrude>
          <tessellate>1</tessellate><altitudeMode>clampToGround</altitudeMode>
          <coordinates> -0.2384046576158355,39.15444635394473,0 -0.2407292745802705,39.15444232451493,0</coordinates>
        </LineString>
      </MultiGeometry>
    </Placemark>
    <Placemark id="ID_10002">
      <name>San Antonio</name>
      <Snippet></Snippet>
      <description><![CDATA[<html xmlns:fo="http://www.w3.org/1999/XSL/Format" xmlns:msxsl="urn:schemas-microsoft-com:xslt">

<head>

<META http-equiv="Content-Type" content="text/html">

<meta http-equiv="content-type" content="text/html; charset=UTF-8">

</head>

<body style="margin:0px 0px 0px 0px;overflow:auto;background:#FFFFFF;">

<table style="font-family:Arial,Verdana,Times;font-size:12px;text-align:left;width:100%;border-collapse:collapse;padding:3px 3px 3px 3px">

<tr style="text-align:center;font-weight:bold;background:#9CBCE2">

<td>San Antonio</td>

</tr>

<tr>

<td>

<table style="font-family:Arial,Verdana,Times;font-size:12px;text-align:left;width:100%;border-spacing:0px; padding:3px 3px 3px 3px">

<tr>

<td>ID_Transecto</td>

<td>3</td>

</tr>

<tr bgcolor="#D4E4F3">

<td>Name</td>

<td>San Antonio</td>

</tr>

<tr>

<td>Y_1956</td>

<td>22</td>

</tr>

<tr bgcolor="#D4E4F3">

<td>Y_1977</td>

<td>108</td>

</tr>

<tr>

<td>Y_1985</td>

<td>124</td>

</tr>

<tr bgcolor="#D4E4F3">

<td>Y_1989</td>

<td>136</td>

</tr>

<tr>

<td>Y_2000</td>

<td>126</td>

</tr>

<tr bgcolor="#D4E4F3">

<td>Y_2004</td>

<td>123</td>

</tr>

<tr>

<td>Y_2006</td>

<td>133</td>

</tr>

<tr bgcolor="#D4E4F3">

<td>Y_2008</td>

<td>120</td>

</tr>

<tr>

<td>Y_2010</td>

<td>117</td>

</tr>

<tr bgcolor="#D4E4F3">

<td>Y_2012</td>

<td>138</td>

</tr>

<tr>

<td>Y_2015</td>

<td>153</td>

</tr>

<tr bgcolor="#D4E4F3">

<td>Y_2017</td>

<td>114</td>

</tr>

<tr>

<td>Y_2018</td>

<td>89</td>

</tr>

<tr bgcolor="#D4E4F3">

<td>Y_2019</td>

<td>114</td>

</tr>

</table>

</td>

</tr>

</table>

</body>

</html>

]]></description>
      <styleUrl>#LineStyle10</styleUrl>
      <MultiGeometry>
        <LineString>
          <extrude>0</extrude>
          <tessellate>1</tessellate><altitudeMode>clampToGround</altitudeMode>
          <coordinates> -0.2384002550679504,39.1534926799276,0 -0.2407119362008452,39.15355548494436,0 -0.2391414552367566,39.15351281708692,0</coordinates>
        </LineString>
      </MultiGeometry>
    </Placemark>
    <Placemark id="ID_10003">
      <name>San Antonio</name>
      <Snippet></Snippet>
      <description><![CDATA[<html xmlns:fo="http://www.w3.org/1999/XSL/Format" xmlns:msxsl="urn:schemas-microsoft-com:xslt">

<head>

<META http-equiv="Content-Type" content="text/html">

<meta http-equiv="content-type" content="text/html; charset=UTF-8">

</head>

<body style="margin:0px 0px 0px 0px;overflow:auto;background:#FFFFFF;">

<table style="font-family:Arial,Verdana,Times;font-size:12px;text-align:left;width:100%;border-collapse:collapse;padding:3px 3px 3px 3px">

<tr style="text-align:center;font-weight:bold;background:#9CBCE2">

<td>San Antonio</td>

</tr>

<tr>

<td>

<table style="font-family:Arial,Verdana,Times;font-size:12px;text-align:left;width:100%;border-spacing:0px; padding:3px 3px 3px 3px">

<tr>

<td>ID_Transecto</td>

<td>4</td>

</tr>

<tr bgcolor="#D4E4F3">

<td>Name</td>

<td>San Antonio</td>

</tr>

<tr>

<td>Y_1956</td>

<td>26</td>

</tr>

<tr bgcolor="#D4E4F3">

<td>Y_1977</td>

<td>92</td>

</tr>

<tr>

<td>Y_1985</td>

<td>104</td>

</tr>

<tr bgcolor="#D4E4F3">

<td>Y_1989</td>

<td>130</td>

</tr>

<tr>

<td>Y_2000</td>

<td>122</td>

</tr>

<tr bgcolor="#D4E4F3">

<td>Y_2004</td>

<td>126</td>

</tr>

<tr>

<td>Y_2006</td>

<td>140</td>

</tr>

<tr bgcolor="#D4E4F3">

<td>Y_2008</td>

<td>109</td>

</tr>

<tr>

<td>Y_2010</td>

<td>123</td>

</tr>

<tr bgcolor="#D4E4F3">

<td>Y_2012</td>

<td>136</td>

</tr>

<tr>

<td>Y_2015</td>

<td>141</td>

</tr>

<tr bgcolor="#D4E4F3">

<td>Y_2017</td>

<td>130</td>

</tr>

<tr>

<td>Y_2018</td>

<td>89</td>

</tr>

<tr bgcolor="#D4E4F3">

<td>Y_2019</td>

<td>122</td>

</tr>

</table>

</td>

</tr>

</table>

</body>

</html>

]]></description>
      <styleUrl>#LineStyle10</styleUrl>
      <MultiGeometry>
        <LineString>
          <extrude>0</extrude>
          <tessellate>1</tessellate><altitudeMode>clampToGround</altitudeMode>
          <coordinates> -0.2385156168830371,39.15535445753539,0 -0.240836342539512,39.15533144852902,0</coordinates>
        </LineString>
      </MultiGeometry>
    </Placemark>
    <Placemark id="ID_10004">
      <name>San Antonio</name>
      <Snippet></Snippet>
      <description><![CDATA[<html xmlns:fo="http://www.w3.org/1999/XSL/Format" xmlns:msxsl="urn:schemas-microsoft-com:xslt">

<head>

<META http-equiv="Content-Type" content="text/html">

<meta http-equiv="content-type" content="text/html; charset=UTF-8">

</head>

<body style="margin:0px 0px 0px 0px;overflow:auto;background:#FFFFFF;">

<table style="font-family:Arial,Verdana,Times;font-size:12px;text-align:left;width:100%;border-collapse:collapse;padding:3px 3px 3px 3px">

<tr style="text-align:center;font-weight:bold;background:#9CBCE2">

<td>San Antonio</td>

</tr>

<tr>

<td>

<table style="font-family:Arial,Verdana,Times;font-size:12px;text-align:left;width:100%;border-spacing:0px; padding:3px 3px 3px 3px">

<tr>

<td>ID_Transecto</td>

<td>5</td>

</tr>

<tr bgcolor="#D4E4F3">

<td>Name</td>

<td>San Antonio</td>

</tr>

<tr>

<td>Y_1956</td>

<td>24</td>

</tr>

<tr bgcolor="#D4E4F3">

<td>Y_1977</td>

<td>84</td>

</tr>

<tr>

<td>Y_1985</td>

<td>94</td>

</tr>

<tr bgcolor="#D4E4F3">

<td>Y_1989</td>

<td>113</td>

</tr>

<tr>

<td>Y_2000</td>

<td>119</td>

</tr>

<tr bgcolor="#D4E4F3">

<td>Y_2004</td>

<td>115</td>

</tr>

<tr>

<td>Y_2006</td>

<td>139</td>

</tr>

<tr bgcolor="#D4E4F3">

<td>Y_2008</td>

<td>107</td>

</tr>

<tr>

<td>Y_2010</td>

<td>125</td>

</tr>

<tr bgcolor="#D4E4F3">

<td>Y_2012</td>

<td>134</td>

</tr>

<tr>

<td>Y_2015</td>

<td>126</td>

</tr>

<tr bgcolor="#D4E4F3">

<td>Y_2017</td>

<td>125</td>

</tr>

<tr>

<td>Y_2018</td>

<td>93</td>

</tr>

<tr bgcolor="#D4E4F3">

<td>Y_2019</td>

<td>124</td>

</tr>

</table>

</td>

</tr>

</table>

</body>

</html>

]]></description>
      <styleUrl>#LineStyle10</styleUrl>
      <MultiGeometry>
        <LineString>
          <extrude>0</extrude>
          <tessellate>1</tessellate><altitudeMode>clampToGround</altitudeMode>
          <coordinates> -0.2384742293566095,39.15629350772008,0 -0.24084959422224,39.15626995846279,0</coordinates>
        </LineString>
      </MultiGeometry>
    </Placemark>
    <Placemark id="ID_10005">
      <name>San Antonio</name>
      <Snippet></Snippet>
      <description><![CDATA[<html xmlns:fo="http://www.w3.org/1999/XSL/Format" xmlns:msxsl="urn:schemas-microsoft-com:xslt">

<head>

<META http-equiv="Content-Type" content="text/html">

<meta http-equiv="content-type" content="text/html; charset=UTF-8">

</head>

<body style="margin:0px 0px 0px 0px;overflow:auto;background:#FFFFFF;">

<table style="font-family:Arial,Verdana,Times;font-size:12px;text-align:left;width:100%;border-collapse:collapse;padding:3px 3px 3px 3px">

<tr style="text-align:center;font-weight:bold;background:#9CBCE2">

<td>San Antonio</td>

</tr>

<tr>

<td>

<table style="font-family:Arial,Verdana,Times;font-size:12px;text-align:left;width:100%;border-spacing:0px; padding:3px 3px 3px 3px">

<tr>

<td>ID_Transecto</td>

<td>6</td>

</tr>

<tr bgcolor="#D4E4F3">

<td>Name</td>

<td>San Antonio</td>

</tr>

<tr>

<td>Y_1956</td>

<td>24</td>

</tr>

<tr bgcolor="#D4E4F3">

<td>Y_1977</td>

<td>87</td>

</tr>

<tr>

<td>Y_1985</td>

<td>99</td>

</tr>

<tr bgcolor="#D4E4F3">

<td>Y_1989</td>

<td>116</td>

</tr>

<tr>

<td>Y_2000</td>

<td>120</td>

</tr>

<tr bgcolor="#D4E4F3">

<td>Y_2004</td>

<td>117</td>

</tr>

<tr>

<td>Y_2006</td>

<td>139</td>

</tr>

<tr bgcolor="#D4E4F3">

<td>Y_2008</td>

<td>125</td>

</tr>

<tr>

<td>Y_2010</td>

<td>126</td>

</tr>

<tr bgcolor="#D4E4F3">

<td>Y_2012</td>

<td>147</td>

</tr>

<tr>

<td>Y_2015</td>

<td>139</td>

</tr>

<tr bgcolor="#D4E4F3">

<td>Y_2017</td>

<td>130</td>

</tr>

<tr>

<td>Y_2018</td>

<td>132</td>

</tr>

<tr bgcolor="#D4E4F3">

<td>Y_2019</td>

<td>132</td>

</tr>

</table>

</td>

</tr>

</table>

</body>

</html>

]]></description>
      <styleUrl>#LineStyle10</styleUrl>
      <MultiGeometry>
        <LineString>
          <extrude>0</extrude>
          <tessellate>1</tessellate><altitudeMode>clampToGround</altitudeMode>
          <coordinates> -0.2386914777374502,39.15709765524423,0 -0.2410274026761512,39.15705052883039,0</coordinates>
        </LineString>
      </MultiGeometry>
    </Placemark>
    <Placemark id="ID_10006">
      <name>San Antonio</name>
      <Snippet></Snippet>
      <description><![CDATA[<html xmlns:fo="http://www.w3.org/1999/XSL/Format" xmlns:msxsl="urn:schemas-microsoft-com:xslt">

<head>

<META http-equiv="Content-Type" content="text/html">

<meta http-equiv="content-type" content="text/html; charset=UTF-8">

</head>

<body style="margin:0px 0px 0px 0px;overflow:auto;background:#FFFFFF;">

<table style="font-family:Arial,Verdana,Times;font-size:12px;text-align:left;width:100%;border-collapse:collapse;padding:3px 3px 3px 3px">

<tr style="text-align:center;font-weight:bold;background:#9CBCE2">

<td>San Antonio</td>

</tr>

<tr>

<td>

<table style="font-family:Arial,Verdana,Times;font-size:12px;text-align:left;width:100%;border-spacing:0px; padding:3px 3px 3px 3px">

<tr>

<td>ID_Transecto</td>

<td>7</td>

</tr>

<tr bgcolor="#D4E4F3">

<td>Name</td>

<td>San Antonio</td>

</tr>

<tr>

<td>Y_1956</td>

<td>33</td>

</tr>

<tr bgcolor="#D4E4F3">

<td>Y_1977</td>

<td>89</td>

</tr>

<tr>

<td>Y_1985</td>

<td>96</td>

</tr>

<tr bgcolor="#D4E4F3">

<td>Y_1989</td>

<td>121</td>

</tr>

<tr>

<td>Y_2000</td>

<td>124</td>

</tr>

<tr bgcolor="#D4E4F3">

<td>Y_2004</td>

<td>118</td>

</tr>

<tr>

<td>Y_2006</td>

<td>137</td>

</tr>

<tr bgcolor="#D4E4F3">

<td>Y_2008</td>

<td>125</td>

</tr>

<tr>

<td>Y_2010</td>

<td>135</td>

</tr>

<tr bgcolor="#D4E4F3">

<td>Y_2012</td>

<td>146</td>

</tr>

<tr>

<td>Y_2015</td>

<td>144</td>

</tr>

<tr bgcolor="#D4E4F3">

<td>Y_2017</td>

<td>130</td>

</tr>

<tr>

<td>Y_2018</td>

<td>142</td>

</tr>

<tr bgcolor="#D4E4F3">

<td>Y_2019</td>

<td>133</td>

</tr>

</table>

</td>

</tr>

</table>

</body>

</html>

]]></description>
      <styleUrl>#LineStyle10</styleUrl>
      <MultiGeometry>
        <LineString>
          <extrude>0</extrude>
          <tessellate>1</tessellate><altitudeMode>clampToGround</altitudeMode>
          <coordinates> -0.2388476330355095,39.15780270825069,0 -0.2411768609732191,39.15770755112975,0</coordinates>
        </LineString>
      </MultiGeometry>
    </Placemark>
    <Placemark id="ID_10007">
      <name>San Antonio</name>
      <Snippet></Snippet>
      <description><![CDATA[<html xmlns:fo="http://www.w3.org/1999/XSL/Format" xmlns:msxsl="urn:schemas-microsoft-com:xslt">

<head>

<META http-equiv="Content-Type" content="text/html">

<meta http-equiv="content-type" content="text/html; charset=UTF-8">

</head>

<body style="margin:0px 0px 0px 0px;overflow:auto;background:#FFFFFF;">

<table style="font-family:Arial,Verdana,Times;font-size:12px;text-align:left;width:100%;border-collapse:collapse;padding:3px 3px 3px 3px">

<tr style="text-align:center;font-weight:bold;background:#9CBCE2">

<td>San Antonio</td>

</tr>

<tr>

<td>

<table style="font-family:Arial,Verdana,Times;font-size:12px;text-align:left;width:100%;border-spacing:0px; padding:3px 3px 3px 3px">

<tr>

<td>ID_Transecto</td>

<td>8</td>

</tr>

<tr bgcolor="#D4E4F3">

<td>Name</td>

<td>San Antonio</td>

</tr>

<tr>

<td>Y_1956</td>

<td>0</td>

</tr>

<tr bgcolor="#D4E4F3">

<td>Y_1977</td>

<td>58</td>

</tr>

<tr>

<td>Y_1985</td>

<td>65</td>

</tr>

<tr bgcolor="#D4E4F3">

<td>Y_1989</td>

<td>89</td>

</tr>

<tr>

<td>Y_2000</td>

<td>93</td>

</tr>

<tr bgcolor="#D4E4F3">

<td>Y_2004</td>

<td>72</td>

</tr>

<tr>

<td>Y_2006</td>

<td>91</td>

</tr>

<tr bgcolor="#D4E4F3">

<td>Y_2008</td>

<td>88</td>

</tr>

<tr>

<td>Y_2010</td>

<td>82</td>

</tr>

<tr bgcolor="#D4E4F3">

<td>Y_2012</td>

<td>105</td>

</tr>

<tr>

<td>Y_2015</td>

<td>103</td>

</tr>

<tr bgcolor="#D4E4F3">

<td>Y_2017</td>

<td>97</td>

</tr>

<tr>

<td>Y_2018</td>

<td>103</td>

</tr>

<tr bgcolor="#D4E4F3">

<td>Y_2019</td>

<td>91</td>

</tr>

</table>

</td>

</tr>

</table>

</body>

</html>

]]></description>
      <styleUrl>#LineStyle10</styleUrl>
      <MultiGeometry>
        <LineString>
          <extrude>0</extrude>
          <tessellate>1</tessellate><altitudeMode>clampToGround</altitudeMode>
          <coordinates> -0.2386581706837309,39.1589550787411,0 -0.240974120658357,39.15882495198026,0</coordinates>
        </LineString>
      </MultiGeometry>
    </Placemark>
    <Placemark id="ID_10008">
      <name>San Antonio</name>
      <Snippet></Snippet>
      <description><![CDATA[<html xmlns:fo="http://www.w3.org/1999/XSL/Format" xmlns:msxsl="urn:schemas-microsoft-com:xslt">

<head>

<META http-equiv="Content-Type" content="text/html">

<meta http-equiv="content-type" content="text/html; charset=UTF-8">

</head>

<body style="margin:0px 0px 0px 0px;overflow:auto;background:#FFFFFF;">

<table style="font-family:Arial,Verdana,Times;font-size:12px;text-align:left;width:100%;border-collapse:collapse;padding:3px 3px 3px 3px">

<tr style="text-align:center;font-weight:bold;background:#9CBCE2">

<td>San Antonio</td>

</tr>

<tr>

<td>

<table style="font-family:Arial,Verdana,Times;font-size:12px;text-align:left;width:100%;border-spacing:0px; padding:3px 3px 3px 3px">

<tr>

<td>ID_Transecto</td>

<td>9</td>

</tr>

<tr bgcolor="#D4E4F3">

<td>Name</td>

<td>San Antonio</td>

</tr>

<tr>

<td>Y_1956</td>

<td>0</td>

</tr>

<tr bgcolor="#D4E4F3">

<td>Y_1977</td>

<td>61</td>

</tr>

<tr>

<td>Y_1985</td>

<td>74</td>

</tr>

<tr bgcolor="#D4E4F3">

<td>Y_1989</td>

<td>88</td>

</tr>

<tr>

<td>Y_2000</td>

<td>102</td>

</tr>

<tr bgcolor="#D4E4F3">

<td>Y_2004</td>

<td>77</td>

</tr>

<tr>

<td>Y_2006</td>

<td>101</td>

</tr>

<tr bgcolor="#D4E4F3">

<td>Y_2008</td>

<td>97</td>

</tr>

<tr>

<td>Y_2010</td>

<td>94</td>

</tr>

<tr bgcolor="#D4E4F3">

<td>Y_2012</td>

<td>109</td>

</tr>

<tr>

<td>Y_2015</td>

<td>104</td>

</tr>

<tr bgcolor="#D4E4F3">

<td>Y_2017</td>

<td>119</td>

</tr>

<tr>

<td>Y_2018</td>

<td>118</td>

</tr>

<tr bgcolor="#D4E4F3">

<td>Y_2019</td>

<td>103</td>

</tr>

</table>

</td>

</tr>

</table>

</body>

</html>

]]></description>
      <styleUrl>#LineStyle10</styleUrl>
      <MultiGeometry>
        <LineString>
          <extrude>0</extrude>
          <tessellate>1</tessellate><altitudeMode>clampToGround</altitudeMode>
          <coordinates> -0.2389088506978968,39.15985236759996,0 -0.2412683376223269,39.15972208832921,0</coordinates>
        </LineString>
      </MultiGeometry>
    </Placemark>
    <Placemark id="ID_10009">
      <name>San Antonio</name>
      <Snippet></Snippet>
      <description><![CDATA[<html xmlns:fo="http://www.w3.org/1999/XSL/Format" xmlns:msxsl="urn:schemas-microsoft-com:xslt">

<head>

<META http-equiv="Content-Type" content="text/html">

<meta http-equiv="content-type" content="text/html; charset=UTF-8">

</head>

<body style="margin:0px 0px 0px 0px;overflow:auto;background:#FFFFFF;">

<table style="font-family:Arial,Verdana,Times;font-size:12px;text-align:left;width:100%;border-collapse:collapse;padding:3px 3px 3px 3px">

<tr style="text-align:center;font-weight:bold;background:#9CBCE2">

<td>San Antonio</td>

</tr>

<tr>

<td>

<table style="font-family:Arial,Verdana,Times;font-size:12px;text-align:left;width:100%;border-spacing:0px; padding:3px 3px 3px 3px">

<tr>

<td>ID_Transecto</td>

<td>10</td>

</tr>

<tr bgcolor="#D4E4F3">

<td>Name</td>

<td>San Antonio</td>

</tr>

<tr>

<td>Y_1956</td>

<td>2</td>

</tr>

<tr bgcolor="#D4E4F3">

<td>Y_1977</td>

<td>65</td>

</tr>

<tr>

<td>Y_1985</td>

<td>65</td>

</tr>

<tr bgcolor="#D4E4F3">

<td>Y_1989</td>

<td>78</td>

</tr>

<tr>

<td>Y_2000</td>

<td>96</td>

</tr>

<tr bgcolor="#D4E4F3">

<td>Y_2004</td>

<td>71</td>

</tr>

<tr>

<td>Y_2006</td>

<td>99</td>

</tr>

<tr bgcolor="#D4E4F3">

<td>Y_2008</td>

<td>97</td>

</tr>

<tr>

<td>Y_2010</td>

<td>90</td>

</tr>

<tr bgcolor="#D4E4F3">

<td>Y_2012</td>

<td>105</td>

</tr>

<tr>

<td>Y_2015</td>

<td>100</td>

</tr>

<tr bgcolor="#D4E4F3">

<td>Y_2017</td>

<td>106</td>

</tr>

<tr>

<td>Y_2018</td>

<td>110</td>

</tr>

<tr bgcolor="#D4E4F3">

<td>Y_2019</td>

<td>93</td>

</tr>

</table>

</td>

</tr>

</table>

</body>

</html>

]]></description>
      <styleUrl>#LineStyle10</styleUrl>
      <MultiGeometry>
        <LineString>
          <extrude>0</extrude>
          <tessellate>1</tessellate><altitudeMode>clampToGround</altitudeMode>
          <coordinates> -0.2389852614352487,39.16074993583766,0 -0.2413785844493636,39.16061752902748,0</coordinates>
        </LineString>
      </MultiGeometry>
    </Placemark>
    <Placemark id="ID_10010">
      <name>San Antonio</name>
      <Snippet></Snippet>
      <description><![CDATA[<html xmlns:fo="http://www.w3.org/1999/XSL/Format" xmlns:msxsl="urn:schemas-microsoft-com:xslt">

<head>

<META http-equiv="Content-Type" content="text/html">

<meta http-equiv="content-type" content="text/html; charset=UTF-8">

</head>

<body style="margin:0px 0px 0px 0px;overflow:auto;background:#FFFFFF;">

<table style="font-family:Arial,Verdana,Times;font-size:12px;text-align:left;width:100%;border-collapse:collapse;padding:3px 3px 3px 3px">

<tr style="text-align:center;font-weight:bold;background:#9CBCE2">

<td>San Antonio</td>

</tr>

<tr>

<td>

<table style="font-family:Arial,Verdana,Times;font-size:12px;text-align:left;width:100%;border-spacing:0px; padding:3px 3px 3px 3px">

<tr>

<td>ID_Transecto</td>

<td>11</td>

</tr>

<tr bgcolor="#D4E4F3">

<td>Name</td>

<td>San Antonio</td>

</tr>

<tr>

<td>Y_1956</td>

<td>0</td>

</tr>

<tr bgcolor="#D4E4F3">

<td>Y_1977</td>

<td>65</td>

</tr>

<tr>

<td>Y_1985</td>

<td>66</td>

</tr>

<tr bgcolor="#D4E4F3">

<td>Y_1989</td>

<td>75</td>

</tr>

<tr>

<td>Y_2000</td>

<td>98</td>

</tr>

<tr bgcolor="#D4E4F3">

<td>Y_2004</td>

<td>71</td>

</tr>

<tr>

<td>Y_2006</td>

<td>95</td>

</tr>

<tr bgcolor="#D4E4F3">

<td>Y_2008</td>

<td>100</td>

</tr>

<tr>

<td>Y_2010</td>

<td>86</td>

</tr>

<tr bgcolor="#D4E4F3">

<td>Y_2012</td>

<td>111</td>

</tr>

<tr>

<td>Y_2015</td>

<td>104</td>

</tr>

<tr bgcolor="#D4E4F3">

<td>Y_2017</td>

<td>100</td>

</tr>

<tr>

<td>Y_2018</td>

<td>101</td>

</tr>

<tr bgcolor="#D4E4F3">

<td>Y_2019</td>

<td>97</td>

</tr>

</table>

</td>

</tr>

</table>

</body>

</html>

]]></description>
      <styleUrl>#LineStyle10</styleUrl>
      <MultiGeometry>
        <LineString>
          <extrude>0</extrude>
          <tessellate>1</tessellate><altitudeMode>clampToGround</altitudeMode>
          <coordinates> -0.2390407534528492,39.16165291695686,0 -0.2414926075478911,39.16151819772058,0</coordinates>
        </LineString>
      </MultiGeometry>
    </Placemark>
    <Placemark id="ID_10011">
      <name>San Antonio</name>
      <Snippet></Snippet>
      <description><![CDATA[<html xmlns:fo="http://www.w3.org/1999/XSL/Format" xmlns:msxsl="urn:schemas-microsoft-com:xslt">

<head>

<META http-equiv="Content-Type" content="text/html">

<meta http-equiv="content-type" content="text/html; charset=UTF-8">

</head>

<body style="margin:0px 0px 0px 0px;overflow:auto;background:#FFFFFF;">

<table style="font-family:Arial,Verdana,Times;font-size:12px;text-align:left;width:100%;border-collapse:collapse;padding:3px 3px 3px 3px">

<tr style="text-align:center;font-weight:bold;background:#9CBCE2">

<td>San Antonio</td>

</tr>

<tr>

<td>

<table style="font-family:Arial,Verdana,Times;font-size:12px;text-align:left;width:100%;border-spacing:0px; padding:3px 3px 3px 3px">

<tr>

<td>ID_Transecto</td>

<td>12</td>

</tr>

<tr bgcolor="#D4E4F3">

<td>Name</td>

<td>San Antonio</td>

</tr>

<tr>

<td>Y_1956</td>

<td>14</td>

</tr>

<tr bgcolor="#D4E4F3">

<td>Y_1977</td>

<td>62</td>

</tr>

<tr>

<td>Y_1985</td>

<td>66</td>

</tr>

<tr bgcolor="#D4E4F3">

<td>Y_1989</td>

<td>78</td>

</tr>

<tr>

<td>Y_2000</td>

<td>96</td>

</tr>

<tr bgcolor="#D4E4F3">

<td>Y_2004</td>

<td>72</td>

</tr>

<tr>

<td>Y_2006</td>

<td>101</td>

</tr>

<tr bgcolor="#D4E4F3">

<td>Y_2008</td>

<td>100</td>

</tr>

<tr>

<td>Y_2010</td>

<td>94</td>

</tr>

<tr bgcolor="#D4E4F3">

<td>Y_2012</td>

<td>112</td>

</tr>

<tr>

<td>Y_2015</td>

<td>100</td>

</tr>

<tr bgcolor="#D4E4F3">

<td>Y_2017</td>

<td>110</td>

</tr>

<tr>

<td>Y_2018</td>

<td>106</td>

</tr>

<tr bgcolor="#D4E4F3">

<td>Y_2019</td>

<td>93</td>

</tr>

</table>

</td>

</tr>

</table>

</body>

</html>

]]></description>
      <styleUrl>#LineStyle10</styleUrl>
      <MultiGeometry>
        <LineString>
          <extrude>0</extrude>
          <tessellate>1</tessellate><altitudeMode>clampToGround</altitudeMode>
          <coordinates> -0.2391925107526072,39.1625520577838,0 -0.2415799549876592,39.16242216496289,0</coordinates>
        </LineString>
      </MultiGeometry>
    </Placemark>
    <Placemark id="ID_10012">
      <name>San Antonio</name>
      <Snippet></Snippet>
      <description><![CDATA[<html xmlns:fo="http://www.w3.org/1999/XSL/Format" xmlns:msxsl="urn:schemas-microsoft-com:xslt">

<head>

<META http-equiv="Content-Type" content="text/html">

<meta http-equiv="content-type" content="text/html; charset=UTF-8">

</head>

<body style="margin:0px 0px 0px 0px;overflow:auto;background:#FFFFFF;">

<table style="font-family:Arial,Verdana,Times;font-size:12px;text-align:left;width:100%;border-collapse:collapse;padding:3px 3px 3px 3px">

<tr style="text-align:center;font-weight:bold;background:#9CBCE2">

<td>San Antonio</td>

</tr>

<tr>

<td>

<table style="font-family:Arial,Verdana,Times;font-size:12px;text-align:left;width:100%;border-spacing:0px; padding:3px 3px 3px 3px">

<tr>

<td>ID_Transecto</td>

<td>13</td>

</tr>

<tr bgcolor="#D4E4F3">

<td>Name</td>

<td>San Antonio</td>

</tr>

<tr>

<td>Y_1956</td>

<td>11</td>

</tr>

<tr bgcolor="#D4E4F3">

<td>Y_1977</td>

<td>54</td>

</tr>

<tr>

<td>Y_1985</td>

<td>69</td>

</tr>

<tr bgcolor="#D4E4F3">

<td>Y_1989</td>

<td>78</td>

</tr>

<tr>

<td>Y_2000</td>

<td>96</td>

</tr>

<tr bgcolor="#D4E4F3">

<td>Y_2004</td>

<td>69</td>

</tr>

<tr>

<td>Y_2006</td>

<td>97</td>

</tr>

<tr bgcolor="#D4E4F3">

<td>Y_2008</td>

<td>98</td>

</tr>

<tr>

<td>Y_2010</td>

<td>91</td>

</tr>

<tr bgcolor="#D4E4F3">

<td>Y_2012</td>

<td>106</td>

</tr>

<tr>

<td>Y_2015</td>

<td>102</td>

</tr>

<tr bgcolor="#D4E4F3">

<td>Y_2017</td>

<td>100</td>

</tr>

<tr>

<td>Y_2018</td>

<td>103</td>

</tr>

<tr bgcolor="#D4E4F3">

<td>Y_2019</td>

<td>99</td>

</tr>

</table>

</td>

</tr>

</table>

</body>

</html>

]]></description>
      <styleUrl>#LineStyle10</styleUrl>
      <MultiGeometry>
        <LineString>
          <extrude>0</extrude>
          <tessellate>1</tessellate><altitudeMode>clampToGround</altitudeMode>
          <coordinates> -0.2388648387647405,39.16345212693397,0 -0.241626149459426,39.16342741448474,0</coordinates>
        </LineString>
      </MultiGeometry>
    </Placemark>
    <Placemark id="ID_10013">
      <name>San Antonio</name>
      <Snippet></Snippet>
      <description><![CDATA[<html xmlns:fo="http://www.w3.org/1999/XSL/Format" xmlns:msxsl="urn:schemas-microsoft-com:xslt">

<head>

<META http-equiv="Content-Type" content="text/html">

<meta http-equiv="content-type" content="text/html; charset=UTF-8">

</head>

<body style="margin:0px 0px 0px 0px;overflow:auto;background:#FFFFFF;">

<table style="font-family:Arial,Verdana,Times;font-size:12px;text-align:left;width:100%;border-collapse:collapse;padding:3px 3px 3px 3px">

<tr style="text-align:center;font-weight:bold;background:#9CBCE2">

<td>San Antonio</td>

</tr>

<tr>

<td>

<table style="font-family:Arial,Verdana,Times;font-size:12px;text-align:left;width:100%;border-spacing:0px; padding:3px 3px 3px 3px">

<tr>

<td>ID_Transecto</td>

<td>14</td>

</tr>

<tr bgcolor="#D4E4F3">

<td>Name</td>

<td>San Antonio</td>

</tr>

<tr>

<td>Y_1956</td>

<td>12</td>

</tr>

<tr bgcolor="#D4E4F3">

<td>Y_1977</td>

<td>46</td>

</tr>

<tr>

<td>Y_1985</td>

<td>69</td>

</tr>

<tr bgcolor="#D4E4F3">

<td>Y_1989</td>

<td>70</td>

</tr>

<tr>

<td>Y_2000</td>

<td>86</td>

</tr>

<tr bgcolor="#D4E4F3">

<td>Y_2004</td>

<td>61</td>

</tr>

<tr>

<td>Y_2006</td>

<td>84</td>

</tr>

<tr bgcolor="#D4E4F3">

<td>Y_2008</td>

<td>95</td>

</tr>

<tr>

<td>Y_2010</td>

<td>80</td>

</tr>

<tr bgcolor="#D4E4F3">

<td>Y_2012</td>

<td>98</td>

</tr>

<tr>

<td>Y_2015</td>

<td>95</td>

</tr>

<tr bgcolor="#D4E4F3">

<td>Y_2017</td>

<td>88</td>

</tr>

<tr>

<td>Y_2018</td>

<td>98</td>

</tr>

<tr bgcolor="#D4E4F3">

<td>Y_2019</td>

<td>90</td>

</tr>

</table>

</td>

</tr>

</table>

</body>

</html>

]]></description>
      <styleUrl>#LineStyle10</styleUrl>
      <MultiGeometry>
        <LineString>
          <extrude>0</extrude>
          <tessellate>1</tessellate><altitudeMode>clampToGround</altitudeMode>
          <coordinates> -0.2392456454470219,39.1644817851355,0 -0.241585638597348,39.16446084142948,0</coordinates>
        </LineString>
      </MultiGeometry>
    </Placemark>
    <Placemark id="ID_10014">
      <name>San Antonio</name>
      <Snippet></Snippet>
      <description><![CDATA[<html xmlns:fo="http://www.w3.org/1999/XSL/Format" xmlns:msxsl="urn:schemas-microsoft-com:xslt">

<head>

<META http-equiv="Content-Type" content="text/html">

<meta http-equiv="content-type" content="text/html; charset=UTF-8">

</head>

<body style="margin:0px 0px 0px 0px;overflow:auto;background:#FFFFFF;">

<table style="font-family:Arial,Verdana,Times;font-size:12px;text-align:left;width:100%;border-collapse:collapse;padding:3px 3px 3px 3px">

<tr style="text-align:center;font-weight:bold;background:#9CBCE2">

<td>San Antonio</td>

</tr>

<tr>

<td>

<table style="font-family:Arial,Verdana,Times;font-size:12px;text-align:left;width:100%;border-spacing:0px; padding:3px 3px 3px 3px">

<tr>

<td>ID_Transecto</td>

<td>15</td>

</tr>

<tr bgcolor="#D4E4F3">

<td>Name</td>

<td>San Antonio</td>

</tr>

<tr>

<td>Y_1956</td>

<td>2</td>

</tr>

<tr bgcolor="#D4E4F3">

<td>Y_1977</td>

<td>40</td>

</tr>

<tr>

<td>Y_1985</td>

<td>59</td>

</tr>

<tr bgcolor="#D4E4F3">

<td>Y_1989</td>

<td>66</td>

</tr>

<tr>

<td>Y_2000</td>

<td>73</td>

</tr>

<tr bgcolor="#D4E4F3">

<td>Y_2004</td>

<td>59</td>

</tr>

<tr>

<td>Y_2006</td>

<td>80</td>

</tr>

<tr bgcolor="#D4E4F3">

<td>Y_2008</td>

<td>85</td>

</tr>

<tr>

<td>Y_2010</td>

<td>81</td>

</tr>

<tr bgcolor="#D4E4F3">

<td>Y_2012</td>

<td>93</td>

</tr>

<tr>

<td>Y_2015</td>

<td>89</td>

</tr>

<tr bgcolor="#D4E4F3">

<td>Y_2017</td>

<td>89</td>

</tr>

<tr>

<td>Y_2018</td>

<td>89</td>

</tr>

<tr bgcolor="#D4E4F3">

<td>Y_2019</td>

<td>84</td>

</tr>

</table>

</td>

</tr>

</table>

</body>

</html>

]]></description>
      <styleUrl>#LineStyle10</styleUrl>
      <MultiGeometry>
        <LineString>
          <extrude>0</extrude>
          <tessellate>1</tessellate><altitudeMode>clampToGround</altitudeMode>
          <coordinates> -0.2392139510741051,39.16530563694671,0 -0.2415333292694614,39.16536184967072,0</coordinates>
        </LineString>
      </MultiGeometry>
    </Placemark>
    <Placemark id="ID_10015">
      <name>San Antonio</name>
      <Snippet></Snippet>
      <description><![CDATA[<html xmlns:fo="http://www.w3.org/1999/XSL/Format" xmlns:msxsl="urn:schemas-microsoft-com:xslt">

<head>

<META http-equiv="Content-Type" content="text/html">

<meta http-equiv="content-type" content="text/html; charset=UTF-8">

</head>

<body style="margin:0px 0px 0px 0px;overflow:auto;background:#FFFFFF;">

<table style="font-family:Arial,Verdana,Times;font-size:12px;text-align:left;width:100%;border-collapse:collapse;padding:3px 3px 3px 3px">

<tr style="text-align:center;font-weight:bold;background:#9CBCE2">

<td>San Antonio</td>

</tr>

<tr>

<td>

<table style="font-family:Arial,Verdana,Times;font-size:12px;text-align:left;width:100%;border-spacing:0px; padding:3px 3px 3px 3px">

<tr>

<td>ID_Transecto</td>

<td>16</td>

</tr>

<tr bgcolor="#D4E4F3">

<td>Name</td>

<td>San Antonio</td>

</tr>

<tr>

<td>Y_1956</td>

<td>8</td>

</tr>

<tr bgcolor="#D4E4F3">

<td>Y_1977</td>

<td>32</td>

</tr>

<tr>

<td>Y_1985</td>

<td>52</td>

</tr>

<tr bgcolor="#D4E4F3">

<td>Y_1989</td>

<td>59</td>

</tr>

<tr>

<td>Y_2000</td>

<td>73</td>

</tr>

<tr bgcolor="#D4E4F3">

<td>Y_2004</td>

<td>51</td>

</tr>

<tr>

<td>Y_2006</td>

<td>77</td>

</tr>

<tr bgcolor="#D4E4F3">

<td>Y_2008</td>

<td>78</td>

</tr>

<tr>

<td>Y_2010</td>

<td>73</td>

</tr>

<tr bgcolor="#D4E4F3">

<td>Y_2012</td>

<td>84</td>

</tr>

<tr>

<td>Y_2015</td>

<td>81</td>

</tr>

<tr bgcolor="#D4E4F3">

<td>Y_2017</td>

<td>84</td>

</tr>

<tr>

<td>Y_2018</td>

<td>89</td>

</tr>

<tr bgcolor="#D4E4F3">

<td>Y_2019</td>

<td>84</td>

</tr>

</table>

</td>

</tr>

</table>

</body>

</html>

]]></description>
      <styleUrl>#LineStyle10</styleUrl>
      <MultiGeometry>
        <LineString>
          <extrude>0</extrude>
          <tessellate>1</tessellate><altitudeMode>clampToGround</altitudeMode>
          <coordinates> -0.2390640264424265,39.16621026523912,0 -0.2414502271221735,39.16627017241126,0</coordinates>
        </LineString>
      </MultiGeometry>
    </Placemark>
    <Placemark id="ID_10016">
      <name>San Antonio</name>
      <Snippet></Snippet>
      <description><![CDATA[<html xmlns:fo="http://www.w3.org/1999/XSL/Format" xmlns:msxsl="urn:schemas-microsoft-com:xslt">

<head>

<META http-equiv="Content-Type" content="text/html">

<meta http-equiv="content-type" content="text/html; charset=UTF-8">

</head>

<body style="margin:0px 0px 0px 0px;overflow:auto;background:#FFFFFF;">

<table style="font-family:Arial,Verdana,Times;font-size:12px;text-align:left;width:100%;border-collapse:collapse;padding:3px 3px 3px 3px">

<tr style="text-align:center;font-weight:bold;background:#9CBCE2">

<td>San Antonio</td>

</tr>

<tr>

<td>

<table style="font-family:Arial,Verdana,Times;font-size:12px;text-align:left;width:100%;border-spacing:0px; padding:3px 3px 3px 3px">

<tr>

<td>ID_Transecto</td>

<td>17</td>

</tr>

<tr bgcolor="#D4E4F3">

<td>Name</td>

<td>San Antonio</td>

</tr>

<tr>

<td>Y_1956</td>

<td>1</td>

</tr>

<tr bgcolor="#D4E4F3">

<td>Y_1977</td>

<td>34</td>

</tr>

<tr>

<td>Y_1985</td>

<td>49</td>

</tr>

<tr bgcolor="#D4E4F3">

<td>Y_1989</td>

<td>55</td>

</tr>

<tr>

<td>Y_2000</td>

<td>75</td>

</tr>

<tr bgcolor="#D4E4F3">

<td>Y_2004</td>

<td>55</td>

</tr>

<tr>

<td>Y_2006</td>

<td>74</td>

</tr>

<tr bgcolor="#D4E4F3">

<td>Y_2008</td>

<td>81</td>

</tr>

<tr>

<td>Y_2010</td>

<td>74</td>

</tr>

<tr bgcolor="#D4E4F3">

<td>Y_2012</td>

<td>81</td>

</tr>

<tr>

<td>Y_2015</td>

<td>83</td>

</tr>

<tr bgcolor="#D4E4F3">

<td>Y_2017</td>

<td>85</td>

</tr>

<tr>

<td>Y_2018</td>

<td>96</td>

</tr>

<tr bgcolor="#D4E4F3">

<td>Y_2019</td>

<td>92</td>

</tr>

</table>

</td>

</tr>

</table>

</body>

</html>

]]></description>
      <styleUrl>#LineStyle10</styleUrl>
      <MultiGeometry>
        <LineString>
          <extrude>0</extrude>
          <tessellate>1</tessellate><altitudeMode>clampToGround</altitudeMode>
          <coordinates> -0.2391011922281253,39.16711216257799,0 -0.2414148693232752,39.16717025309744,0</coordinates>
        </LineString>
      </MultiGeometry>
    </Placemark>
    <Placemark id="ID_10017">
      <name>San Antonio</name>
      <Snippet></Snippet>
      <description><![CDATA[<html xmlns:fo="http://www.w3.org/1999/XSL/Format" xmlns:msxsl="urn:schemas-microsoft-com:xslt">

<head>

<META http-equiv="Content-Type" content="text/html">

<meta http-equiv="content-type" content="text/html; charset=UTF-8">

</head>

<body style="margin:0px 0px 0px 0px;overflow:auto;background:#FFFFFF;">

<table style="font-family:Arial,Verdana,Times;font-size:12px;text-align:left;width:100%;border-collapse:collapse;padding:3px 3px 3px 3px">

<tr style="text-align:center;font-weight:bold;background:#9CBCE2">

<td>San Antonio</td>

</tr>

<tr>

<td>

<table style="font-family:Arial,Verdana,Times;font-size:12px;text-align:left;width:100%;border-spacing:0px; padding:3px 3px 3px 3px">

<tr>

<td>ID_Transecto</td>

<td>18</td>

</tr>

<tr bgcolor="#D4E4F3">

<td>Name</td>

<td>San Antonio</td>

</tr>

<tr>

<td>Y_1956</td>

<td>9</td>

</tr>

<tr bgcolor="#D4E4F3">

<td>Y_1977</td>

<td>44</td>

</tr>

<tr>

<td>Y_1985</td>

<td>46</td>

</tr>

<tr bgcolor="#D4E4F3">

<td>Y_1989</td>

<td>56</td>

</tr>

<tr>

<td>Y_2000</td>

<td>77</td>

</tr>

<tr bgcolor="#D4E4F3">

<td>Y_2004</td>

<td>56</td>

</tr>

<tr>

<td>Y_2006</td>

<td>73</td>

</tr>

<tr bgcolor="#D4E4F3">

<td>Y_2008</td>

<td>83</td>

</tr>

<tr>

<td>Y_2010</td>

<td>73</td>

</tr>

<tr bgcolor="#D4E4F3">

<td>Y_2012</td>

<td>89</td>

</tr>

<tr>

<td>Y_2015</td>

<td>90</td>

</tr>

<tr bgcolor="#D4E4F3">

<td>Y_2017</td>

<td>81</td>

</tr>

<tr>

<td>Y_2018</td>

<td>99</td>

</tr>

<tr bgcolor="#D4E4F3">

<td>Y_2019</td>

<td>98</td>

</tr>

</table>

</td>

</tr>

</table>

</body>

</html>

]]></description>
      <styleUrl>#LineStyle10</styleUrl>
      <MultiGeometry>
        <LineString>
          <extrude>0</extrude>
          <tessellate>1</tessellate><altitudeMode>clampToGround</altitudeMode>
          <coordinates> -0.2390157395199204,39.16801096241755,0 -0.2413775926518353,39.16807026477272,0</coordinates>
        </LineString>
      </MultiGeometry>
    </Placemark>
    <Placemark id="ID_10018">
      <name>San Antonio</name>
      <Snippet></Snippet>
      <description><![CDATA[<html xmlns:fo="http://www.w3.org/1999/XSL/Format" xmlns:msxsl="urn:schemas-microsoft-com:xslt">

<head>

<META http-equiv="Content-Type" content="text/html">

<meta http-equiv="content-type" content="text/html; charset=UTF-8">

</head>

<body style="margin:0px 0px 0px 0px;overflow:auto;background:#FFFFFF;">

<table style="font-family:Arial,Verdana,Times;font-size:12px;text-align:left;width:100%;border-collapse:collapse;padding:3px 3px 3px 3px">

<tr style="text-align:center;font-weight:bold;background:#9CBCE2">

<td>San Antonio</td>

</tr>

<tr>

<td>

<table style="font-family:Arial,Verdana,Times;font-size:12px;text-align:left;width:100%;border-spacing:0px; padding:3px 3px 3px 3px">

<tr>

<td>ID_Transecto</td>

<td>19</td>

</tr>

<tr bgcolor="#D4E4F3">

<td>Name</td>

<td>San Antonio</td>

</tr>

<tr>

<td>Y_1956</td>

<td>4</td>

</tr>

<tr bgcolor="#D4E4F3">

<td>Y_1977</td>

<td>37</td>

</tr>

<tr>

<td>Y_1985</td>

<td>49</td>

</tr>

<tr bgcolor="#D4E4F3">

<td>Y_1989</td>

<td>50</td>

</tr>

<tr>

<td>Y_2000</td>

<td>72</td>

</tr>

<tr bgcolor="#D4E4F3">

<td>Y_2004</td>

<td>58</td>

</tr>

<tr>

<td>Y_2006</td>

<td>70</td>

</tr>

<tr bgcolor="#D4E4F3">

<td>Y_2008</td>

<td>68</td>

</tr>

<tr>

<td>Y_2010</td>

<td>75</td>

</tr>

<tr bgcolor="#D4E4F3">

<td>Y_2012</td>

<td>90</td>

</tr>

<tr>

<td>Y_2015</td>

<td>80</td>

</tr>

<tr bgcolor="#D4E4F3">

<td>Y_2017</td>

<td>74</td>

</tr>

<tr>

<td>Y_2018</td>

<td>95</td>

</tr>

<tr bgcolor="#D4E4F3">

<td>Y_2019</td>

<td>90</td>

</tr>

</table>

</td>

</tr>

</table>

</body>

</html>

]]></description>
      <styleUrl>#LineStyle10</styleUrl>
      <MultiGeometry>
        <LineString>
          <extrude>0</extrude>
          <tessellate>1</tessellate><altitudeMode>clampToGround</altitudeMode>
          <coordinates> -0.2386227456078686,39.16907304501745,0 -0.2411563349917829,39.16918993169299,0</coordinates>
        </LineString>
      </MultiGeometry>
    </Placemark>
    <Placemark id="ID_10019">
      <name>San Antonio</name>
      <Snippet></Snippet>
      <description><![CDATA[<html xmlns:fo="http://www.w3.org/1999/XSL/Format" xmlns:msxsl="urn:schemas-microsoft-com:xslt">

<head>

<META http-equiv="Content-Type" content="text/html">

<meta http-equiv="content-type" content="text/html; charset=UTF-8">

</head>

<body style="margin:0px 0px 0px 0px;overflow:auto;background:#FFFFFF;">

<table style="font-family:Arial,Verdana,Times;font-size:12px;text-align:left;width:100%;border-collapse:collapse;padding:3px 3px 3px 3px">

<tr style="text-align:center;font-weight:bold;background:#9CBCE2">

<td>San Antonio</td>

</tr>

<tr>

<td>

<table style="font-family:Arial,Verdana,Times;font-size:12px;text-align:left;width:100%;border-spacing:0px; padding:3px 3px 3px 3px">

<tr>

<td>ID_Transecto</td>

<td>20</td>

</tr>

<tr bgcolor="#D4E4F3">

<td>Name</td>

<td>San Antonio</td>

</tr>

<tr>

<td>Y_1956</td>

<td>8</td>

</tr>

<tr bgcolor="#D4E4F3">

<td>Y_1977</td>

<td>34</td>

</tr>

<tr>

<td>Y_1985</td>

<td>58</td>

</tr>

<tr bgcolor="#D4E4F3">

<td>Y_1989</td>

<td>53</td>

</tr>

<tr>

<td>Y_2000</td>

<td>83</td>

</tr>

<tr bgcolor="#D4E4F3">

<td>Y_2004</td>

<td>62</td>

</tr>

<tr>

<td>Y_2006</td>

<td>74</td>

</tr>

<tr bgcolor="#D4E4F3">

<td>Y_2008</td>

<td>73</td>

</tr>

<tr>

<td>Y_2010</td>

<td>82</td>

</tr>

<tr bgcolor="#D4E4F3">

<td>Y_2012</td>

<td>97</td>

</tr>

<tr>

<td>Y_2015</td>

<td>83</td>

</tr>

<tr bgcolor="#D4E4F3">

<td>Y_2017</td>

<td>78</td>

</tr>

<tr>

<td>Y_2018</td>

<td>105</td>

</tr>

<tr bgcolor="#D4E4F3">

<td>Y_2019</td>

<td>94</td>

</tr>

</table>

</td>

</tr>

</table>

</body>

</html>

]]></description>
      <styleUrl>#LineStyle10</styleUrl>
      <MultiGeometry>
        <LineString>
          <extrude>0</extrude>
          <tessellate>1</tessellate><altitudeMode>clampToGround</altitudeMode>
          <coordinates> -0.2385744988221473,39.16997698233865,0 -0.2387625307821012,39.16998155483947,0 -0.2410879098873384,39.17008883472197,0</coordinates>
        </LineString>
      </MultiGeometry>
    </Placemark>
    <Placemark id="ID_10020">
      <name>San Antonio</name>
      <Snippet></Snippet>
      <description><![CDATA[<html xmlns:fo="http://www.w3.org/1999/XSL/Format" xmlns:msxsl="urn:schemas-microsoft-com:xslt">

<head>

<META http-equiv="Content-Type" content="text/html">

<meta http-equiv="content-type" content="text/html; charset=UTF-8">

</head>

<body style="margin:0px 0px 0px 0px;overflow:auto;background:#FFFFFF;">

<table style="font-family:Arial,Verdana,Times;font-size:12px;text-align:left;width:100%;border-collapse:collapse;padding:3px 3px 3px 3px">

<tr style="text-align:center;font-weight:bold;background:#9CBCE2">

<td>San Antonio</td>

</tr>

<tr>

<td>

<table style="font-family:Arial,Verdana,Times;font-size:12px;text-align:left;width:100%;border-spacing:0px; padding:3px 3px 3px 3px">

<tr>

<td>ID_Transecto</td>

<td>21</td>

</tr>

<tr bgcolor="#D4E4F3">

<td>Name</td>

<td>San Antonio</td>

</tr>

<tr>

<td>Y_1956</td>

<td>9</td>

</tr>

<tr bgcolor="#D4E4F3">

<td>Y_1977</td>

<td>28</td>

</tr>

<tr>

<td>Y_1985</td>

<td>46</td>

</tr>

<tr bgcolor="#D4E4F3">

<td>Y_1989</td>

<td>52</td>

</tr>

<tr>

<td>Y_2000</td>

<td>82</td>

</tr>

<tr bgcolor="#D4E4F3">

<td>Y_2004</td>

<td>63</td>

</tr>

<tr>

<td>Y_2006</td>

<td>86</td>

</tr>

<tr bgcolor="#D4E4F3">

<td>Y_2008</td>

<td>79</td>

</tr>

<tr>

<td>Y_2010</td>

<td>79</td>

</tr>

<tr bgcolor="#D4E4F3">

<td>Y_2012</td>

<td>82</td>

</tr>

<tr>

<td>Y_2015</td>

<td>82</td>

</tr>

<tr bgcolor="#D4E4F3">

<td>Y_2017</td>

<td>80</td>

</tr>

<tr>

<td>Y_2018</td>

<td>98</td>

</tr>

<tr bgcolor="#D4E4F3">

<td>Y_2019</td>

<td>97</td>

</tr>

</table>

</td>

</tr>

</table>

</body>

</html>

]]></description>
      <styleUrl>#LineStyle10</styleUrl>
      <MultiGeometry>
        <LineString>
          <extrude>0</extrude>
          <tessellate>1</tessellate><altitudeMode>clampToGround</altitudeMode>
          <coordinates> -0.2385381129432485,39.1709599039541,0 -0.2408719320080807,39.17118680876576,0</coordinates>
        </LineString>
      </MultiGeometry>
    </Placemark>
    <Placemark id="ID_10021">
      <name>San Antonio</name>
      <Snippet></Snippet>
      <description><![CDATA[<html xmlns:fo="http://www.w3.org/1999/XSL/Format" xmlns:msxsl="urn:schemas-microsoft-com:xslt">

<head>

<META http-equiv="Content-Type" content="text/html">

<meta http-equiv="content-type" content="text/html; charset=UTF-8">

</head>

<body style="margin:0px 0px 0px 0px;overflow:auto;background:#FFFFFF;">

<table style="font-family:Arial,Verdana,Times;font-size:12px;text-align:left;width:100%;border-collapse:collapse;padding:3px 3px 3px 3px">

<tr style="text-align:center;font-weight:bold;background:#9CBCE2">

<td>San Antonio</td>

</tr>

<tr>

<td>

<table style="font-family:Arial,Verdana,Times;font-size:12px;text-align:left;width:100%;border-spacing:0px; padding:3px 3px 3px 3px">

<tr>

<td>ID_Transecto</td>

<td>22</td>

</tr>

<tr bgcolor="#D4E4F3">

<td>Name</td>

<td>San Antonio</td>

</tr>

<tr>

<td>Y_1956</td>

<td>10</td>

</tr>

<tr bgcolor="#D4E4F3">

<td>Y_1977</td>

<td>24</td>

</tr>

<tr>

<td>Y_1985</td>

<td>51</td>

</tr>

<tr bgcolor="#D4E4F3">

<td>Y_1989</td>

<td>50</td>

</tr>

<tr>

<td>Y_2000</td>

<td>77</td>

</tr>

<tr bgcolor="#D4E4F3">

<td>Y_2004</td>

<td>60</td>

</tr>

<tr>

<td>Y_2006</td>

<td>78</td>

</tr>

<tr bgcolor="#D4E4F3">

<td>Y_2008</td>

<td>79</td>

</tr>

<tr>

<td>Y_2010</td>

<td>79</td>

</tr>

<tr bgcolor="#D4E4F3">

<td>Y_2012</td>

<td>83</td>

</tr>

<tr>

<td>Y_2015</td>

<td>78</td>

</tr>

<tr bgcolor="#D4E4F3">

<td>Y_2017</td>

<td>87</td>

</tr>

<tr>

<td>Y_2018</td>

<td>94</td>

</tr>

<tr bgcolor="#D4E4F3">

<td>Y_2019</td>

<td>99</td>

</tr>

</table>

</td>

</tr>

</table>

</body>

</html>

]]></description>
      <styleUrl>#LineStyle10</styleUrl>
      <MultiGeometry>
        <LineString>
          <extrude>0</extrude>
          <tessellate>1</tessellate><altitudeMode>clampToGround</altitudeMode>
          <coordinates> -0.2383299354240646,39.17182624998492,0 -0.2407746423402296,39.17208409762045,0</coordinates>
        </LineString>
      </MultiGeometry>
    </Placemark>
    <Placemark id="ID_10022">
      <name>Racó</name>
      <Snippet></Snippet>
      <description><![CDATA[<html xmlns:fo="http://www.w3.org/1999/XSL/Format" xmlns:msxsl="urn:schemas-microsoft-com:xslt">

<head>

<META http-equiv="Content-Type" content="text/html">

<meta http-equiv="content-type" content="text/html; charset=UTF-8">

</head>

<body style="margin:0px 0px 0px 0px;overflow:auto;background:#FFFFFF;">

<table style="font-family:Arial,Verdana,Times;font-size:12px;text-align:left;width:100%;border-collapse:collapse;padding:3px 3px 3px 3px">

<tr style="text-align:center;font-weight:bold;background:#9CBCE2">

<td>Racó</td>

</tr>

<tr>

<td>

<table style="font-family:Arial,Verdana,Times;font-size:12px;text-align:left;width:100%;border-spacing:0px; padding:3px 3px 3px 3px">

<tr>

<td>ID_Transecto</td>

<td>23</td>

</tr>

<tr bgcolor="#D4E4F3">

<td>Name</td>

<td>Racó</td>

</tr>

<tr>

<td>Y_1956</td>

<td>8</td>

</tr>

<tr bgcolor="#D4E4F3">

<td>Y_1977</td>

<td>20</td>

</tr>

<tr>

<td>Y_1985</td>

<td>44</td>

</tr>

<tr bgcolor="#D4E4F3">

<td>Y_1989</td>

<td>46</td>

</tr>

<tr>

<td>Y_2000</td>

<td>73</td>

</tr>

<tr bgcolor="#D4E4F3">

<td>Y_2004</td>

<td>56</td>

</tr>

<tr>

<td>Y_2006</td>

<td>64</td>

</tr>

<tr bgcolor="#D4E4F3">

<td>Y_2008</td>

<td>75</td>

</tr>

<tr>

<td>Y_2010</td>

<td>79</td>

</tr>

<tr bgcolor="#D4E4F3">

<td>Y_2012</td>

<td>85</td>

</tr>

<tr>

<td>Y_2015</td>

<td>75</td>

</tr>

<tr bgcolor="#D4E4F3">

<td>Y_2017</td>

<td>100</td>

</tr>

<tr>

<td>Y_2018</td>

<td>91</td>

</tr>

<tr bgcolor="#D4E4F3">

<td>Y_2019</td>

<td>96</td>

</tr>

</table>

</td>

</tr>

</table>

</body>

</html>

]]></description>
      <styleUrl>#LineStyle10</styleUrl>
      <MultiGeometry>
        <LineString>
          <extrude>0</extrude>
          <tessellate>1</tessellate><altitudeMode>clampToGround</altitudeMode>
          <coordinates> -0.2380685246644731,39.1727761809572,0 -0.2404232814776685,39.17303355766177,0</coordinates>
        </LineString>
      </MultiGeometry>
    </Placemark>
    <Placemark id="ID_10023">
      <name>Racó</name>
      <Snippet></Snippet>
      <description><![CDATA[<html xmlns:fo="http://www.w3.org/1999/XSL/Format" xmlns:msxsl="urn:schemas-microsoft-com:xslt">

<head>

<META http-equiv="Content-Type" content="text/html">

<meta http-equiv="content-type" content="text/html; charset=UTF-8">

</head>

<body style="margin:0px 0px 0px 0px;overflow:auto;background:#FFFFFF;">

<table style="font-family:Arial,Verdana,Times;font-size:12px;text-align:left;width:100%;border-collapse:collapse;padding:3px 3px 3px 3px">

<tr style="text-align:center;font-weight:bold;background:#9CBCE2">

<td>Racó</td>

</tr>

<tr>

<td>

<table style="font-family:Arial,Verdana,Times;font-size:12px;text-align:left;width:100%;border-spacing:0px; padding:3px 3px 3px 3px">

<tr>

<td>ID_Transecto</td>

<td>24</td>

</tr>

<tr bgcolor="#D4E4F3">

<td>Name</td>

<td>Racó</td>

</tr>

<tr>

<td>Y_1956</td>

<td>9</td>

</tr>

<tr bgcolor="#D4E4F3">

<td>Y_1977</td>

<td>20</td>

</tr>

<tr>

<td>Y_1985</td>

<td>35</td>

</tr>

<tr bgcolor="#D4E4F3">

<td>Y_1989</td>

<td>36</td>

</tr>

<tr>

<td>Y_2000</td>

<td>72</td>

</tr>

<tr bgcolor="#D4E4F3">

<td>Y_2004</td>

<td>56</td>

</tr>

<tr>

<td>Y_2006</td>

<td>70</td>

</tr>

<tr bgcolor="#D4E4F3">

<td>Y_2008</td>

<td>74</td>

</tr>

<tr>

<td>Y_2010</td>

<td>71</td>

</tr>

<tr bgcolor="#D4E4F3">

<td>Y_2012</td>

<td>82</td>

</tr>

<tr>

<td>Y_2015</td>

<td>68</td>

</tr>

<tr bgcolor="#D4E4F3">

<td>Y_2017</td>

<td>88</td>

</tr>

<tr>

<td>Y_2018</td>

<td>95</td>

</tr>

<tr bgcolor="#D4E4F3">

<td>Y_2019</td>

<td>84</td>

</tr>

</table>

</td>

</tr>

</table>

</body>

</html>

]]></description>
      <styleUrl>#LineStyle10</styleUrl>
      <MultiGeometry>
        <LineString>
          <extrude>0</extrude>
          <tessellate>1</tessellate><altitudeMode>clampToGround</altitudeMode>
          <coordinates> -0.2376324146510362,39.17386067852789,0 -0.239969092577524,39.17418552560741,0</coordinates>
        </LineString>
      </MultiGeometry>
    </Placemark>
    <Placemark id="ID_10024">
      <name>Racó</name>
      <Snippet></Snippet>
      <description><![CDATA[<html xmlns:fo="http://www.w3.org/1999/XSL/Format" xmlns:msxsl="urn:schemas-microsoft-com:xslt">

<head>

<META http-equiv="Content-Type" content="text/html">

<meta http-equiv="content-type" content="text/html; charset=UTF-8">

</head>

<body style="margin:0px 0px 0px 0px;overflow:auto;background:#FFFFFF;">

<table style="font-family:Arial,Verdana,Times;font-size:12px;text-align:left;width:100%;border-collapse:collapse;padding:3px 3px 3px 3px">

<tr style="text-align:center;font-weight:bold;background:#9CBCE2">

<td>Racó</td>

</tr>

<tr>

<td>

<table style="font-family:Arial,Verdana,Times;font-size:12px;text-align:left;width:100%;border-spacing:0px; padding:3px 3px 3px 3px">

<tr>

<td>ID_Transecto</td>

<td>25</td>

</tr>

<tr bgcolor="#D4E4F3">

<td>Name</td>

<td>Racó</td>

</tr>

<tr>

<td>Y_1956</td>

<td>13</td>

</tr>

<tr bgcolor="#D4E4F3">

<td>Y_1977</td>

<td>21</td>

</tr>

<tr>

<td>Y_1985</td>

<td>30</td>

</tr>

<tr bgcolor="#D4E4F3">

<td>Y_1989</td>

<td>38</td>

</tr>

<tr>

<td>Y_2000</td>

<td>79</td>

</tr>

<tr bgcolor="#D4E4F3">

<td>Y_2004</td>

<td>55</td>

</tr>

<tr>

<td>Y_2006</td>

<td>75</td>

</tr>

<tr bgcolor="#D4E4F3">

<td>Y_2008</td>

<td>81</td>

</tr>

<tr>

<td>Y_2010</td>

<td>69</td>

</tr>

<tr bgcolor="#D4E4F3">

<td>Y_2012</td>

<td>79</td>

</tr>

<tr>

<td>Y_2015</td>

<td>77</td>

</tr>

<tr bgcolor="#D4E4F3">

<td>Y_2017</td>

<td>77</td>

</tr>

<tr>

<td>Y_2018</td>

<td>88</td>

</tr>

<tr bgcolor="#D4E4F3">

<td>Y_2019</td>

<td>89</td>

</tr>

</table>

</td>

</tr>

</table>

</body>

</html>

]]></description>
      <styleUrl>#LineStyle10</styleUrl>
      <MultiGeometry>
        <LineString>
          <extrude>0</extrude>
          <tessellate>1</tessellate><altitudeMode>clampToGround</altitudeMode>
          <coordinates> -0.2371950146823371,39.17477087349648,0 -0.2395633440433861,39.17514631937644,0</coordinates>
        </LineString>
      </MultiGeometry>
    </Placemark>
    <Placemark id="ID_10025">
      <name>Racó</name>
      <Snippet></Snippet>
      <description><![CDATA[<html xmlns:fo="http://www.w3.org/1999/XSL/Format" xmlns:msxsl="urn:schemas-microsoft-com:xslt">

<head>

<META http-equiv="Content-Type" content="text/html">

<meta http-equiv="content-type" content="text/html; charset=UTF-8">

</head>

<body style="margin:0px 0px 0px 0px;overflow:auto;background:#FFFFFF;">

<table style="font-family:Arial,Verdana,Times;font-size:12px;text-align:left;width:100%;border-collapse:collapse;padding:3px 3px 3px 3px">

<tr style="text-align:center;font-weight:bold;background:#9CBCE2">

<td>Racó</td>

</tr>

<tr>

<td>

<table style="font-family:Arial,Verdana,Times;font-size:12px;text-align:left;width:100%;border-spacing:0px; padding:3px 3px 3px 3px">

<tr>

<td>ID_Transecto</td>

<td>26</td>

</tr>

<tr bgcolor="#D4E4F3">

<td>Name</td>

<td>Racó</td>

</tr>

<tr>

<td>Y_1956</td>

<td>22</td>

</tr>

<tr bgcolor="#D4E4F3">

<td>Y_1977</td>

<td>12</td>

</tr>

<tr>

<td>Y_1985</td>

<td>31</td>

</tr>

<tr bgcolor="#D4E4F3">

<td>Y_1989</td>

<td>39</td>

</tr>

<tr>

<td>Y_2000</td>

<td>72</td>

</tr>

<tr bgcolor="#D4E4F3">

<td>Y_2004</td>

<td>53</td>

</tr>

<tr>

<td>Y_2006</td>

<td>69</td>

</tr>

<tr bgcolor="#D4E4F3">

<td>Y_2008</td>

<td>74</td>

</tr>

<tr>

<td>Y_2010</td>

<td>64</td>

</tr>

<tr bgcolor="#D4E4F3">

<td>Y_2012</td>

<td>80</td>

</tr>

<tr>

<td>Y_2015</td>

<td>71</td>

</tr>

<tr bgcolor="#D4E4F3">

<td>Y_2017</td>

<td>89</td>

</tr>

<tr>

<td>Y_2018</td>

<td>89</td>

</tr>

<tr bgcolor="#D4E4F3">

<td>Y_2019</td>

<td>78</td>

</tr>

</table>

</td>

</tr>

</table>

</body>

</html>

]]></description>
      <styleUrl>#LineStyle10</styleUrl>
      <MultiGeometry>
        <LineString>
          <extrude>0</extrude>
          <tessellate>1</tessellate><altitudeMode>clampToGround</altitudeMode>
          <coordinates> -0.2365353820805274,39.1760104271571,0 -0.2388367029774425,39.17651886549056,0</coordinates>
        </LineString>
      </MultiGeometry>
    </Placemark>
    <Placemark id="ID_10026">
      <name>Racó</name>
      <Snippet></Snippet>
      <description><![CDATA[<html xmlns:fo="http://www.w3.org/1999/XSL/Format" xmlns:msxsl="urn:schemas-microsoft-com:xslt">

<head>

<META http-equiv="Content-Type" content="text/html">

<meta http-equiv="content-type" content="text/html; charset=UTF-8">

</head>

<body style="margin:0px 0px 0px 0px;overflow:auto;background:#FFFFFF;">

<table style="font-family:Arial,Verdana,Times;font-size:12px;text-align:left;width:100%;border-collapse:collapse;padding:3px 3px 3px 3px">

<tr style="text-align:center;font-weight:bold;background:#9CBCE2">

<td>Racó</td>

</tr>

<tr>

<td>

<table style="font-family:Arial,Verdana,Times;font-size:12px;text-align:left;width:100%;border-spacing:0px; padding:3px 3px 3px 3px">

<tr>

<td>ID_Transecto</td>

<td>27</td>

</tr>

<tr bgcolor="#D4E4F3">

<td>Name</td>

<td>Racó</td>

</tr>

<tr>

<td>Y_1956</td>

<td>51</td>

</tr>

<tr bgcolor="#D4E4F3">

<td>Y_1977</td>

<td>12</td>

</tr>

<tr>

<td>Y_1985</td>

<td>35</td>

</tr>

<tr bgcolor="#D4E4F3">

<td>Y_1989</td>

<td>41</td>

</tr>

<tr>

<td>Y_2000</td>

<td>82</td>

</tr>

<tr bgcolor="#D4E4F3">

<td>Y_2004</td>

<td>56</td>

</tr>

<tr>

<td>Y_2006</td>

<td>76</td>

</tr>

<tr bgcolor="#D4E4F3">

<td>Y_2008</td>

<td>83</td>

</tr>

<tr>

<td>Y_2010</td>

<td>65</td>

</tr>

<tr bgcolor="#D4E4F3">

<td>Y_2012</td>

<td>87</td>

</tr>

<tr>

<td>Y_2015</td>

<td>77</td>

</tr>

<tr bgcolor="#D4E4F3">

<td>Y_2017</td>

<td>91</td>

</tr>

<tr>

<td>Y_2018</td>

<td>89</td>

</tr>

<tr bgcolor="#D4E4F3">

<td>Y_2019</td>

<td>82</td>

</tr>

</table>

</td>

</tr>

</table>

</body>

</html>

]]></description>
      <styleUrl>#LineStyle10</styleUrl>
      <MultiGeometry>
        <LineString>
          <extrude>0</extrude>
          <tessellate>1</tessellate><altitudeMode>clampToGround</altitudeMode>
          <coordinates> -0.2360497012342342,39.17674810135867,0 -0.2382279377006081,39.17754338766844,0</coordinates>
        </LineString>
      </MultiGeometry>
    </Placemark>
    <Placemark id="ID_10027">
      <name>Racó</name>
      <Snippet></Snippet>
      <description><![CDATA[<html xmlns:fo="http://www.w3.org/1999/XSL/Format" xmlns:msxsl="urn:schemas-microsoft-com:xslt">

<head>

<META http-equiv="Content-Type" content="text/html">

<meta http-equiv="content-type" content="text/html; charset=UTF-8">

</head>

<body style="margin:0px 0px 0px 0px;overflow:auto;background:#FFFFFF;">

<table style="font-family:Arial,Verdana,Times;font-size:12px;text-align:left;width:100%;border-collapse:collapse;padding:3px 3px 3px 3px">

<tr style="text-align:center;font-weight:bold;background:#9CBCE2">

<td>Racó</td>

</tr>

<tr>

<td>

<table style="font-family:Arial,Verdana,Times;font-size:12px;text-align:left;width:100%;border-spacing:0px; padding:3px 3px 3px 3px">

<tr>

<td>ID_Transecto</td>

<td>28</td>

</tr>

<tr bgcolor="#D4E4F3">

<td>Name</td>

<td>Racó</td>

</tr>

<tr>

<td>Y_1956</td>

<td>59</td>

</tr>

<tr bgcolor="#D4E4F3">

<td>Y_1977</td>

<td>14</td>

</tr>

<tr>

<td>Y_1985</td>

<td>16</td>

</tr>

<tr bgcolor="#D4E4F3">

<td>Y_1989</td>

<td>32</td>

</tr>

<tr>

<td>Y_2000</td>

<td>67</td>

</tr>

<tr bgcolor="#D4E4F3">

<td>Y_2004</td>

<td>62</td>

</tr>

<tr>

<td>Y_2006</td>

<td>67</td>

</tr>

<tr bgcolor="#D4E4F3">

<td>Y_2008</td>

<td>81</td>

</tr>

<tr>

<td>Y_2010</td>

<td>69</td>

</tr>

<tr bgcolor="#D4E4F3">

<td>Y_2012</td>

<td>83</td>

</tr>

<tr>

<td>Y_2015</td>

<td>78</td>

</tr>

<tr bgcolor="#D4E4F3">

<td>Y_2017</td>

<td>75</td>

</tr>

<tr>

<td>Y_2018</td>

<td>75</td>

</tr>

<tr bgcolor="#D4E4F3">

<td>Y_2019</td>

<td>70</td>

</tr>

</table>

</td>

</tr>

</table>

</body>

</html>

]]></description>
      <styleUrl>#LineStyle10</styleUrl>
      <MultiGeometry>
        <LineString>
          <extrude>0</extrude>
          <tessellate>1</tessellate><altitudeMode>clampToGround</altitudeMode>
          <coordinates> -0.235474449266582,39.17739198609934,0 -0.2374566720400882,39.17834781731863,0</coordinates>
        </LineString>
      </MultiGeometry>
    </Placemark>
    <Placemark id="ID_10028">
      <name>Racó</name>
      <Snippet></Snippet>
      <description><![CDATA[<html xmlns:fo="http://www.w3.org/1999/XSL/Format" xmlns:msxsl="urn:schemas-microsoft-com:xslt">

<head>

<META http-equiv="Content-Type" content="text/html">

<meta http-equiv="content-type" content="text/html; charset=UTF-8">

</head>

<body style="margin:0px 0px 0px 0px;overflow:auto;background:#FFFFFF;">

<table style="font-family:Arial,Verdana,Times;font-size:12px;text-align:left;width:100%;border-collapse:collapse;padding:3px 3px 3px 3px">

<tr style="text-align:center;font-weight:bold;background:#9CBCE2">

<td>Racó</td>

</tr>

<tr>

<td>

<table style="font-family:Arial,Verdana,Times;font-size:12px;text-align:left;width:100%;border-spacing:0px; padding:3px 3px 3px 3px">

<tr>

<td>ID_Transecto</td>

<td>29</td>

</tr>

<tr bgcolor="#D4E4F3">

<td>Name</td>

<td>Racó</td>

</tr>

<tr>

<td>Y_1956</td>

<td>73</td>

</tr>

<tr bgcolor="#D4E4F3">

<td>Y_1977</td>

<td>11</td>

</tr>

<tr>

<td>Y_1985</td>

<td>11</td>

</tr>

<tr bgcolor="#D4E4F3">

<td>Y_1989</td>

<td>24</td>

</tr>

<tr>

<td>Y_2000</td>

<td>72</td>

</tr>

<tr bgcolor="#D4E4F3">

<td>Y_2004</td>

<td>61</td>

</tr>

<tr>

<td>Y_2006</td>

<td>64</td>

</tr>

<tr bgcolor="#D4E4F3">

<td>Y_2008</td>

<td>76</td>

</tr>

<tr>

<td>Y_2010</td>

<td>78</td>

</tr>

<tr bgcolor="#D4E4F3">

<td>Y_2012</td>

<td>76</td>

</tr>

<tr>

<td>Y_2015</td>

<td>80</td>

</tr>

<tr bgcolor="#D4E4F3">

<td>Y_2017</td>

<td>78</td>

</tr>

<tr>

<td>Y_2018</td>

<td>69</td>

</tr>

<tr bgcolor="#D4E4F3">

<td>Y_2019</td>

<td>66</td>

</tr>

</table>

</td>

</tr>

</table>

</body>

</html>

]]></description>
      <styleUrl>#LineStyle10</styleUrl>
      <MultiGeometry>
        <LineString>
          <extrude>0</extrude>
          <tessellate>1</tessellate><altitudeMode>clampToGround</altitudeMode>
          <coordinates> -0.2349256380575762,39.17787823290558,0 -0.236706348801738,39.17905940139573,0</coordinates>
        </LineString>
      </MultiGeometry>
    </Placemark>
    <Placemark id="ID_10029">
      <name>Racó</name>
      <Snippet></Snippet>
      <description><![CDATA[<html xmlns:fo="http://www.w3.org/1999/XSL/Format" xmlns:msxsl="urn:schemas-microsoft-com:xslt">

<head>

<META http-equiv="Content-Type" content="text/html">

<meta http-equiv="content-type" content="text/html; charset=UTF-8">

</head>

<body style="margin:0px 0px 0px 0px;overflow:auto;background:#FFFFFF;">

<table style="font-family:Arial,Verdana,Times;font-size:12px;text-align:left;width:100%;border-collapse:collapse;padding:3px 3px 3px 3px">

<tr style="text-align:center;font-weight:bold;background:#9CBCE2">

<td>Racó</td>

</tr>

<tr>

<td>

<table style="font-family:Arial,Verdana,Times;font-size:12px;text-align:left;width:100%;border-spacing:0px; padding:3px 3px 3px 3px">

<tr>

<td>ID_Transecto</td>

<td>30</td>

</tr>

<tr bgcolor="#D4E4F3">

<td>Name</td>

<td>Racó</td>

</tr>

<tr>

<td>Y_1956</td>

<td>86</td>

</tr>

<tr bgcolor="#D4E4F3">

<td>Y_1977</td>

<td>6</td>

</tr>

<tr>

<td>Y_1985</td>

<td>5</td>

</tr>

<tr bgcolor="#D4E4F3">

<td>Y_1989</td>

<td>14</td>

</tr>

<tr>

<td>Y_2000</td>

<td>76</td>

</tr>

<tr bgcolor="#D4E4F3">

<td>Y_2004</td>

<td>52</td>

</tr>

<tr>

<td>Y_2006</td>

<td>65</td>

</tr>

<tr bgcolor="#D4E4F3">

<td>Y_2008</td>

<td>73</td>

</tr>

<tr>

<td>Y_2010</td>

<td>74</td>

</tr>

<tr bgcolor="#D4E4F3">

<td>Y_2012</td>

<td>68</td>

</tr>

<tr>

<td>Y_2015</td>

<td>71</td>

</tr>

<tr bgcolor="#D4E4F3">

<td>Y_2017</td>

<td>83</td>

</tr>

<tr>

<td>Y_2018</td>

<td>68</td>

</tr>

<tr bgcolor="#D4E4F3">

<td>Y_2019</td>

<td>61</td>

</tr>

</table>

</td>

</tr>

</table>

</body>

</html>

]]></description>
      <styleUrl>#LineStyle10</styleUrl>
      <MultiGeometry>
        <LineString>
          <extrude>0</extrude>
          <tessellate>1</tessellate><altitudeMode>clampToGround</altitudeMode>
          <coordinates> -0.2341101930071685,39.17842496554322,0 -0.2357865426601058,39.17973724000777,0</coordinates>
        </LineString>
      </MultiGeometry>
    </Placemark>
    <Placemark id="ID_10030">
      <name>Racó</name>
      <Snippet></Snippet>
      <description><![CDATA[<html xmlns:fo="http://www.w3.org/1999/XSL/Format" xmlns:msxsl="urn:schemas-microsoft-com:xslt">

<head>

<META http-equiv="Content-Type" content="text/html">

<meta http-equiv="content-type" content="text/html; charset=UTF-8">

</head>

<body style="margin:0px 0px 0px 0px;overflow:auto;background:#FFFFFF;">

<table style="font-family:Arial,Verdana,Times;font-size:12px;text-align:left;width:100%;border-collapse:collapse;padding:3px 3px 3px 3px">

<tr style="text-align:center;font-weight:bold;background:#9CBCE2">

<td>Racó</td>

</tr>

<tr>

<td>

<table style="font-family:Arial,Verdana,Times;font-size:12px;text-align:left;width:100%;border-spacing:0px; padding:3px 3px 3px 3px">

<tr>

<td>ID_Transecto</td>

<td>31</td>

</tr>

<tr bgcolor="#D4E4F3">

<td>Name</td>

<td>Racó</td>

</tr>

<tr>

<td>Y_1956</td>

<td>96</td>

</tr>

<tr bgcolor="#D4E4F3">

<td>Y_1977</td>

<td>16</td>

</tr>

<tr>

<td>Y_1985</td>

<td>9</td>

</tr>

<tr bgcolor="#D4E4F3">

<td>Y_1989</td>

<td>20</td>

</tr>

<tr>

<td>Y_2000</td>

<td>83</td>

</tr>

<tr bgcolor="#D4E4F3">

<td>Y_2004</td>

<td>44</td>

</tr>

<tr>

<td>Y_2006</td>

<td>56</td>

</tr>

<tr bgcolor="#D4E4F3">

<td>Y_2008</td>

<td>70</td>

</tr>

<tr>

<td>Y_2010</td>

<td>70</td>

</tr>

<tr bgcolor="#D4E4F3">

<td>Y_2012</td>

<td>61</td>

</tr>

<tr>

<td>Y_2015</td>

<td>62</td>

</tr>

<tr bgcolor="#D4E4F3">

<td>Y_2017</td>

<td>81</td>

</tr>

<tr>

<td>Y_2018</td>

<td>60</td>

</tr>

<tr bgcolor="#D4E4F3">

<td>Y_2019</td>

<td>53</td>

</tr>

</table>

</td>

</tr>

</table>

</body>

</html>

]]></description>
      <styleUrl>#LineStyle10</styleUrl>
      <MultiGeometry>
        <LineString>
          <extrude>0</extrude>
          <tessellate>1</tessellate><altitudeMode>clampToGround</altitudeMode>
          <coordinates> -0.2334026743408698,39.17873586396578,0 -0.2345725652490207,39.18037447673205,0</coordinates>
        </LineString>
      </MultiGeometry>
    </Placemark>
    <Placemark id="ID_10031">
      <name>Racó</name>
      <Snippet></Snippet>
      <description><![CDATA[<html xmlns:fo="http://www.w3.org/1999/XSL/Format" xmlns:msxsl="urn:schemas-microsoft-com:xslt">

<head>

<META http-equiv="Content-Type" content="text/html">

<meta http-equiv="content-type" content="text/html; charset=UTF-8">

</head>

<body style="margin:0px 0px 0px 0px;overflow:auto;background:#FFFFFF;">

<table style="font-family:Arial,Verdana,Times;font-size:12px;text-align:left;width:100%;border-collapse:collapse;padding:3px 3px 3px 3px">

<tr style="text-align:center;font-weight:bold;background:#9CBCE2">

<td>Racó</td>

</tr>

<tr>

<td>

<table style="font-family:Arial,Verdana,Times;font-size:12px;text-align:left;width:100%;border-spacing:0px; padding:3px 3px 3px 3px">

<tr>

<td>ID_Transecto</td>

<td>32</td>

</tr>

<tr bgcolor="#D4E4F3">

<td>Name</td>

<td>Racó</td>

</tr>

<tr>

<td>Y_1956</td>

<td>101</td>

</tr>

<tr bgcolor="#D4E4F3">

<td>Y_1977</td>

<td>21</td>

</tr>

<tr>

<td>Y_1985</td>

<td>11</td>

</tr>

<tr bgcolor="#D4E4F3">

<td>Y_1989</td>

<td>16</td>

</tr>

<tr>

<td>Y_2000</td>

<td>72</td>

</tr>

<tr bgcolor="#D4E4F3">

<td>Y_2004</td>

<td>35</td>

</tr>

<tr>

<td>Y_2006</td>

<td>51</td>

</tr>

<tr bgcolor="#D4E4F3">

<td>Y_2008</td>

<td>71</td>

</tr>

<tr>

<td>Y_2010</td>

<td>49</td>

</tr>

<tr bgcolor="#D4E4F3">

<td>Y_2012</td>

<td>51</td>

</tr>

<tr>

<td>Y_2015</td>

<td>32</td>

</tr>

<tr bgcolor="#D4E4F3">

<td>Y_2017</td>

<td>65</td>

</tr>

<tr>

<td>Y_2018</td>

<td>37</td>

</tr>

<tr bgcolor="#D4E4F3">

<td>Y_2019</td>

<td>39</td>

</tr>

</table>

</td>

</tr>

</table>

</body>

</html>

]]></description>
      <styleUrl>#LineStyle10</styleUrl>
      <MultiGeometry>
        <LineString>
          <extrude>0</extrude>
          <tessellate>1</tessellate><altitudeMode>clampToGround</altitudeMode>
          <coordinates> -0.2328747983077199,39.17877750069563,0 -0.2333130832789453,39.18059859993648,0</coordinates>
        </LineString>
      </MultiGeometry>
    </Placemark>
    <Placemark id="ID_10032">
      <name>Racó</name>
      <Snippet></Snippet>
      <description><![CDATA[<html xmlns:fo="http://www.w3.org/1999/XSL/Format" xmlns:msxsl="urn:schemas-microsoft-com:xslt">

<head>

<META http-equiv="Content-Type" content="text/html">

<meta http-equiv="content-type" content="text/html; charset=UTF-8">

</head>

<body style="margin:0px 0px 0px 0px;overflow:auto;background:#FFFFFF;">

<table style="font-family:Arial,Verdana,Times;font-size:12px;text-align:left;width:100%;border-collapse:collapse;padding:3px 3px 3px 3px">

<tr style="text-align:center;font-weight:bold;background:#9CBCE2">

<td>Racó</td>

</tr>

<tr>

<td>

<table style="font-family:Arial,Verdana,Times;font-size:12px;text-align:left;width:100%;border-spacing:0px; padding:3px 3px 3px 3px">

<tr>

<td>ID_Transecto</td>

<td>33</td>

</tr>

<tr bgcolor="#D4E4F3">

<td>Name</td>

<td>Racó</td>

</tr>

<tr>

<td>Y_1956</td>

<td>121</td>

</tr>

<tr bgcolor="#D4E4F3">

<td>Y_1977</td>

<td>34</td>

</tr>

<tr>

<td>Y_1985</td>

<td>26</td>

</tr>

<tr bgcolor="#D4E4F3">

<td>Y_1989</td>

<td>25</td>

</tr>

<tr>

<td>Y_2000</td>

<td>68</td>

</tr>

<tr bgcolor="#D4E4F3">

<td>Y_2004</td>

<td>83</td>

</tr>

<tr>

<td>Y_2006</td>

<td>105</td>

</tr>

<tr bgcolor="#D4E4F3">

<td>Y_2008</td>

<td>94</td>

</tr>

<tr>

<td>Y_2010</td>

<td>40</td>

</tr>

<tr bgcolor="#D4E4F3">

<td>Y_2012</td>

<td>86</td>

</tr>

<tr>

<td>Y_2015</td>

<td>52</td>

</tr>

<tr bgcolor="#D4E4F3">

<td>Y_2017</td>

<td>59</td>

</tr>

<tr>

<td>Y_2018</td>

<td>28</td>

</tr>

<tr bgcolor="#D4E4F3">

<td>Y_2019</td>

<td>96</td>

</tr>

</table>

</td>

</tr>

</table>

</body>

</html>

]]></description>
      <styleUrl>#LineStyle10</styleUrl>
      <MultiGeometry>
        <LineString>
          <extrude>0</extrude>
          <tessellate>1</tessellate><altitudeMode>clampToGround</altitudeMode>
          <coordinates> -0.2312810696745727,39.18063674213398,0 -0.2321174431736348,39.17877343177741,0</coordinates>
        </LineString>
        <LineString>
          <extrude>0</extrude>
          <tessellate>1</tessellate><altitudeMode>clampToGround</altitudeMode>
          <coordinates> -0.2312810696745727,39.18063674213398,0 -0.2321174431736348,39.17877343177741,0</coordinates>
        </LineString>
      </MultiGeometry>
    </Placemark>
    <Placemark id="ID_10033">
      <name>Racó</name>
      <Snippet></Snippet>
      <description><![CDATA[<html xmlns:fo="http://www.w3.org/1999/XSL/Format" xmlns:msxsl="urn:schemas-microsoft-com:xslt">

<head>

<META http-equiv="Content-Type" content="text/html">

<meta http-equiv="content-type" content="text/html; charset=UTF-8">

</head>

<body style="margin:0px 0px 0px 0px;overflow:auto;background:#FFFFFF;">

<table style="font-family:Arial,Verdana,Times;font-size:12px;text-align:left;width:100%;border-collapse:collapse;padding:3px 3px 3px 3px">

<tr style="text-align:center;font-weight:bold;background:#9CBCE2">

<td>Racó</td>

</tr>

<tr>

<td>

<table style="font-family:Arial,Verdana,Times;font-size:12px;text-align:left;width:100%;border-spacing:0px; padding:3px 3px 3px 3px">

<tr>

<td>ID_Transecto</td>

<td>34</td>

</tr>

<tr bgcolor="#D4E4F3">

<td>Name</td>

<td>Racó</td>

</tr>

<tr>

<td>Y_1956</td>

<td>68</td>

</tr>

<tr bgcolor="#D4E4F3">

<td>Y_1977</td>

<td>44</td>

</tr>

<tr>

<td>Y_1985</td>

<td>3</td>

</tr>

<tr bgcolor="#D4E4F3">

<td>Y_1989</td>

<td>8</td>

</tr>

<tr>

<td>Y_2000</td>

<td>56</td>

</tr>

<tr bgcolor="#D4E4F3">

<td>Y_2004</td>

<td>95</td>

</tr>

<tr>

<td>Y_2006</td>

<td>76</td>

</tr>

<tr bgcolor="#D4E4F3">

<td>Y_2008</td>

<td>66</td>

</tr>

<tr>

<td>Y_2010</td>

<td>54</td>

</tr>

<tr bgcolor="#D4E4F3">

<td>Y_2012</td>

<td>61</td>

</tr>

<tr>

<td>Y_2015</td>

<td>63</td>

</tr>

<tr bgcolor="#D4E4F3">

<td>Y_2017</td>

<td>57</td>

</tr>

<tr>

<td>Y_2018</td>

<td>68</td>

</tr>

<tr bgcolor="#D4E4F3">

<td>Y_2019</td>

<td>86</td>

</tr>

</table>

</td>

</tr>

</table>

</body>

</html>

]]></description>
      <styleUrl>#LineStyle10</styleUrl>
      <MultiGeometry>
        <LineString>
          <extrude>0</extrude>
          <tessellate>1</tessellate><altitudeMode>clampToGround</altitudeMode>
          <coordinates> -0.230411656738121,39.17839250662816,0 -0.2302182752675185,39.18018922685488,0</coordinates>
        </LineString>
      </MultiGeometry>
    </Placemark>
    <Placemark id="ID_10034">
      <name>Cap Blanc</name>
      <Snippet></Snippet>
      <description><![CDATA[<html xmlns:fo="http://www.w3.org/1999/XSL/Format" xmlns:msxsl="urn:schemas-microsoft-com:xslt">

<head>

<META http-equiv="Content-Type" content="text/html">

<meta http-equiv="content-type" content="text/html; charset=UTF-8">

</head>

<body style="margin:0px 0px 0px 0px;overflow:auto;background:#FFFFFF;">

<table style="font-family:Arial,Verdana,Times;font-size:12px;text-align:left;width:100%;border-collapse:collapse;padding:3px 3px 3px 3px">

<tr style="text-align:center;font-weight:bold;background:#9CBCE2">

<td>Cap Blanc</td>

</tr>

<tr>

<td>

<table style="font-family:Arial,Verdana,Times;font-size:12px;text-align:left;width:100%;border-spacing:0px; padding:3px 3px 3px 3px">

<tr>

<td>ID_Transecto</td>

<td>35</td>

</tr>

<tr bgcolor="#D4E4F3">

<td>Name</td>

<td>Cap Blanc</td>

</tr>

<tr>

<td>Y_1956</td>

<td>112</td>

</tr>

<tr bgcolor="#D4E4F3">

<td>Y_1977</td>

<td>77</td>

</tr>

<tr>

<td>Y_1985</td>

<td>17</td>

</tr>

<tr bgcolor="#D4E4F3">

<td>Y_1989</td>

<td>26</td>

</tr>

<tr>

<td>Y_2000</td>

<td>120</td>

</tr>

<tr bgcolor="#D4E4F3">

<td>Y_2004</td>

<td>103</td>

</tr>

<tr>

<td>Y_2006</td>

<td>118</td>

</tr>

<tr bgcolor="#D4E4F3">

<td>Y_2008</td>

<td>105</td>

</tr>

<tr>

<td>Y_2010</td>

<td>129</td>

</tr>

<tr bgcolor="#D4E4F3">

<td>Y_2012</td>

<td>118</td>

</tr>

<tr>

<td>Y_2015</td>

<td>112</td>

</tr>

<tr bgcolor="#D4E4F3">

<td>Y_2017</td>

<td>119</td>

</tr>

<tr>

<td>Y_2018</td>

<td>133</td>

</tr>

<tr bgcolor="#D4E4F3">

<td>Y_2019</td>

<td>136</td>

</tr>

</table>

</td>

</tr>

</table>

</body>

</html>

]]></description>
      <styleUrl>#LineStyle10</styleUrl>
      <MultiGeometry>
        <LineString>
          <extrude>0</extrude>
          <tessellate>1</tessellate><altitudeMode>clampToGround</altitudeMode>
          <coordinates> -0.2273736795556698,39.17857473636259,0 -0.2294117348715885,39.18079477565146,0</coordinates>
        </LineString>
      </MultiGeometry>
    </Placemark>
    <Placemark id="ID_10035">
      <name>Cap Blanc</name>
      <Snippet></Snippet>
      <description><![CDATA[<html xmlns:fo="http://www.w3.org/1999/XSL/Format" xmlns:msxsl="urn:schemas-microsoft-com:xslt">

<head>

<META http-equiv="Content-Type" content="text/html">

<meta http-equiv="content-type" content="text/html; charset=UTF-8">

</head>

<body style="margin:0px 0px 0px 0px;overflow:auto;background:#FFFFFF;">

<table style="font-family:Arial,Verdana,Times;font-size:12px;text-align:left;width:100%;border-collapse:collapse;padding:3px 3px 3px 3px">

<tr style="text-align:center;font-weight:bold;background:#9CBCE2">

<td>Cap Blanc</td>

</tr>

<tr>

<td>

<table style="font-family:Arial,Verdana,Times;font-size:12px;text-align:left;width:100%;border-spacing:0px; padding:3px 3px 3px 3px">

<tr>

<td>ID_Transecto</td>

<td>36</td>

</tr>

<tr bgcolor="#D4E4F3">

<td>Name</td>

<td>Cap Blanc</td>

</tr>

<tr>

<td>Y_1956</td>

<td>102</td>

</tr>

<tr bgcolor="#D4E4F3">

<td>Y_1977</td>

<td>78</td>

</tr>

<tr>

<td>Y_1985</td>

<td>27</td>

</tr>

<tr bgcolor="#D4E4F3">

<td>Y_1989</td>

<td>3</td>

</tr>

<tr>

<td>Y_2000</td>

<td>107</td>

</tr>

<tr bgcolor="#D4E4F3">

<td>Y_2004</td>

<td>94</td>

</tr>

<tr>

<td>Y_2006</td>

<td>98</td>

</tr>

<tr bgcolor="#D4E4F3">

<td>Y_2008</td>

<td>98</td>

</tr>

<tr>

<td>Y_2010</td>

<td>103</td>

</tr>

<tr bgcolor="#D4E4F3">

<td>Y_2012</td>

<td>113</td>

</tr>

<tr>

<td>Y_2015</td>

<td>97</td>

</tr>

<tr bgcolor="#D4E4F3">

<td>Y_2017</td>

<td>118</td>

</tr>

<tr>

<td>Y_2018</td>

<td>120</td>

</tr>

<tr bgcolor="#D4E4F3">

<td>Y_2019</td>

<td>110</td>

</tr>

</table>

</td>

</tr>

</table>

</body>

</html>

]]></description>
      <styleUrl>#LineStyle10</styleUrl>
      <MultiGeometry>
        <LineString>
          <extrude>0</extrude>
          <tessellate>1</tessellate><altitudeMode>clampToGround</altitudeMode>
          <coordinates> -0.2261786187373455,39.17886627979602,0 -0.2286782361890156,39.18122353262896,0</coordinates>
        </LineString>
      </MultiGeometry>
    </Placemark>
    <Placemark id="ID_10036">
      <name>Cap Blanc</name>
      <Snippet></Snippet>
      <description><![CDATA[<html xmlns:fo="http://www.w3.org/1999/XSL/Format" xmlns:msxsl="urn:schemas-microsoft-com:xslt">

<head>

<META http-equiv="Content-Type" content="text/html">

<meta http-equiv="content-type" content="text/html; charset=UTF-8">

</head>

<body style="margin:0px 0px 0px 0px;overflow:auto;background:#FFFFFF;">

<table style="font-family:Arial,Verdana,Times;font-size:12px;text-align:left;width:100%;border-collapse:collapse;padding:3px 3px 3px 3px">

<tr style="text-align:center;font-weight:bold;background:#9CBCE2">

<td>Cap Blanc</td>

</tr>

<tr>

<td>

<table style="font-family:Arial,Verdana,Times;font-size:12px;text-align:left;width:100%;border-spacing:0px; padding:3px 3px 3px 3px">

<tr>

<td>ID_Transecto</td>

<td>37</td>

</tr>

<tr bgcolor="#D4E4F3">

<td>Name</td>

<td>Cap Blanc</td>

</tr>

<tr>

<td>Y_1956</td>

<td>120</td>

</tr>

<tr bgcolor="#D4E4F3">

<td>Y_1977</td>

<td>76</td>

</tr>

<tr>

<td>Y_1985</td>

<td>127</td>

</tr>

<tr bgcolor="#D4E4F3">

<td>Y_1989</td>

<td>79</td>

</tr>

<tr>

<td>Y_2000</td>

<td>110</td>

</tr>

<tr bgcolor="#D4E4F3">

<td>Y_2004</td>

<td>80</td>

</tr>

<tr>

<td>Y_2006</td>

<td>106</td>

</tr>

<tr bgcolor="#D4E4F3">

<td>Y_2008</td>

<td>102</td>

</tr>

<tr>

<td>Y_2010</td>

<td>98</td>

</tr>

<tr bgcolor="#D4E4F3">

<td>Y_2012</td>

<td>107</td>

</tr>

<tr>

<td>Y_2015</td>

<td>100</td>

</tr>

<tr bgcolor="#D4E4F3">

<td>Y_2017</td>

<td>111</td>

</tr>

<tr>

<td>Y_2018</td>

<td>120</td>

</tr>

<tr bgcolor="#D4E4F3">

<td>Y_2019</td>

<td>108</td>

</tr>

</table>

</td>

</tr>

</table>

</body>

</html>

]]></description>
      <styleUrl>#LineStyle10</styleUrl>
      <MultiGeometry>
        <LineString>
          <extrude>0</extrude>
          <tessellate>1</tessellate><altitudeMode>clampToGround</altitudeMode>
          <coordinates> -0.2251950375990472,39.17923128177063,0 -0.2279899873979198,39.18173435692271,0</coordinates>
        </LineString>
      </MultiGeometry>
    </Placemark>
    <Placemark id="ID_10037">
      <name>Los Olivos</name>
      <Snippet></Snippet>
      <description><![CDATA[<html xmlns:fo="http://www.w3.org/1999/XSL/Format" xmlns:msxsl="urn:schemas-microsoft-com:xslt">

<head>

<META http-equiv="Content-Type" content="text/html">

<meta http-equiv="content-type" content="text/html; charset=UTF-8">

</head>

<body style="margin:0px 0px 0px 0px;overflow:auto;background:#FFFFFF;">

<table style="font-family:Arial,Verdana,Times;font-size:12px;text-align:left;width:100%;border-collapse:collapse;padding:3px 3px 3px 3px">

<tr style="text-align:center;font-weight:bold;background:#9CBCE2">

<td>Los Olivos</td>

</tr>

<tr>

<td>

<table style="font-family:Arial,Verdana,Times;font-size:12px;text-align:left;width:100%;border-spacing:0px; padding:3px 3px 3px 3px">

<tr>

<td>ID_Transecto</td>

<td>38</td>

</tr>

<tr bgcolor="#D4E4F3">

<td>Name</td>

<td>Los Olivos</td>

</tr>

<tr>

<td>Y_1956</td>

<td>7</td>

</tr>

<tr bgcolor="#D4E4F3">

<td>Y_1977</td>

<td>33</td>

</tr>

<tr>

<td>Y_1985</td>

<td>174</td>

</tr>

<tr bgcolor="#D4E4F3">

<td>Y_1989</td>

<td>183</td>

</tr>

<tr>

<td>Y_2000</td>

<td>79</td>

</tr>

<tr bgcolor="#D4E4F3">

<td>Y_2004</td>

<td>73</td>

</tr>

<tr>

<td>Y_2006</td>

<td>90</td>

</tr>

<tr bgcolor="#D4E4F3">

<td>Y_2008</td>

<td>79</td>

</tr>

<tr>

<td>Y_2010</td>

<td>89</td>

</tr>

<tr bgcolor="#D4E4F3">

<td>Y_2012</td>

<td>87</td>

</tr>

<tr>

<td>Y_2015</td>

<td>74</td>

</tr>

<tr bgcolor="#D4E4F3">

<td>Y_2017</td>

<td>72</td>

</tr>

<tr>

<td>Y_2018</td>

<td>98</td>

</tr>

<tr bgcolor="#D4E4F3">

<td>Y_2019</td>

<td>86</td>

</tr>

</table>

</td>

</tr>

</table>

</body>

</html>

]]></description>
      <styleUrl>#LineStyle10</styleUrl>
      <MultiGeometry>
        <LineString>
          <extrude>0</extrude>
          <tessellate>1</tessellate><altitudeMode>clampToGround</altitudeMode>
          <coordinates> -0.2229909488938993,39.18005085387181,0 -0.2248178100663377,39.18115684984144,0</coordinates>
        </LineString>
      </MultiGeometry>
    </Placemark>
    <Placemark id="ID_10038">
      <name>Los Olivos</name>
      <Snippet></Snippet>
      <description><![CDATA[<html xmlns:fo="http://www.w3.org/1999/XSL/Format" xmlns:msxsl="urn:schemas-microsoft-com:xslt">

<head>

<META http-equiv="Content-Type" content="text/html">

<meta http-equiv="content-type" content="text/html; charset=UTF-8">

</head>

<body style="margin:0px 0px 0px 0px;overflow:auto;background:#FFFFFF;">

<table style="font-family:Arial,Verdana,Times;font-size:12px;text-align:left;width:100%;border-collapse:collapse;padding:3px 3px 3px 3px">

<tr style="text-align:center;font-weight:bold;background:#9CBCE2">

<td>Los Olivos</td>

</tr>

<tr>

<td>

<table style="font-family:Arial,Verdana,Times;font-size:12px;text-align:left;width:100%;border-spacing:0px; padding:3px 3px 3px 3px">

<tr>

<td>ID_Transecto</td>

<td>39</td>

</tr>

<tr bgcolor="#D4E4F3">

<td>Name</td>

<td>Los Olivos</td>

</tr>

<tr>

<td>Y_1956</td>

<td>24</td>

</tr>

<tr bgcolor="#D4E4F3">

<td>Y_1977</td>

<td>27</td>

</tr>

<tr>

<td>Y_1985</td>

<td>159</td>

</tr>

<tr bgcolor="#D4E4F3">

<td>Y_1989</td>

<td>161</td>

</tr>

<tr>

<td>Y_2000</td>

<td>83</td>

</tr>

<tr bgcolor="#D4E4F3">

<td>Y_2004</td>

<td>78</td>

</tr>

<tr>

<td>Y_2006</td>

<td>97</td>

</tr>

<tr bgcolor="#D4E4F3">

<td>Y_2008</td>

<td>88</td>

</tr>

<tr>

<td>Y_2010</td>

<td>95</td>

</tr>

<tr bgcolor="#D4E4F3">

<td>Y_2012</td>

<td>88</td>

</tr>

<tr>

<td>Y_2015</td>

<td>85</td>

</tr>

<tr bgcolor="#D4E4F3">

<td>Y_2017</td>

<td>95</td>

</tr>

<tr>

<td>Y_2018</td>

<td>106</td>

</tr>

<tr bgcolor="#D4E4F3">

<td>Y_2019</td>

<td>85</td>

</tr>

</table>

</td>

</tr>

</table>

</body>

</html>

]]></description>
      <styleUrl>#LineStyle10</styleUrl>
      <MultiGeometry>
        <LineString>
          <extrude>0</extrude>
          <tessellate>1</tessellate><altitudeMode>clampToGround</altitudeMode>
          <coordinates> -0.2225749046451661,39.18023618781469,0 -0.2238864912634681,39.18176466546842,0</coordinates>
        </LineString>
      </MultiGeometry>
    </Placemark>
    <Placemark id="ID_10039">
      <name>Los Olivos</name>
      <Snippet></Snippet>
      <description><![CDATA[<html xmlns:fo="http://www.w3.org/1999/XSL/Format" xmlns:msxsl="urn:schemas-microsoft-com:xslt">

<head>

<META http-equiv="Content-Type" content="text/html">

<meta http-equiv="content-type" content="text/html; charset=UTF-8">

</head>

<body style="margin:0px 0px 0px 0px;overflow:auto;background:#FFFFFF;">

<table style="font-family:Arial,Verdana,Times;font-size:12px;text-align:left;width:100%;border-collapse:collapse;padding:3px 3px 3px 3px">

<tr style="text-align:center;font-weight:bold;background:#9CBCE2">

<td>Los Olivos</td>

</tr>

<tr>

<td>

<table style="font-family:Arial,Verdana,Times;font-size:12px;text-align:left;width:100%;border-spacing:0px; padding:3px 3px 3px 3px">

<tr>

<td>ID_Transecto</td>

<td>40</td>

</tr>

<tr bgcolor="#D4E4F3">

<td>Name</td>

<td>Los Olivos</td>

</tr>

<tr>

<td>Y_1956</td>

<td>26</td>

</tr>

<tr bgcolor="#D4E4F3">

<td>Y_1977</td>

<td>19</td>

</tr>

<tr>

<td>Y_1985</td>

<td>133</td>

</tr>

<tr bgcolor="#D4E4F3">

<td>Y_1989</td>

<td>145</td>

</tr>

<tr>

<td>Y_2000</td>

<td>77</td>

</tr>

<tr bgcolor="#D4E4F3">

<td>Y_2004</td>

<td>70</td>

</tr>

<tr>

<td>Y_2006</td>

<td>88</td>

</tr>

<tr bgcolor="#D4E4F3">

<td>Y_2008</td>

<td>79</td>

</tr>

<tr>

<td>Y_2010</td>

<td>82</td>

</tr>

<tr bgcolor="#D4E4F3">

<td>Y_2012</td>

<td>71</td>

</tr>

<tr>

<td>Y_2015</td>

<td>77</td>

</tr>

<tr bgcolor="#D4E4F3">

<td>Y_2017</td>

<td>97</td>

</tr>

<tr>

<td>Y_2018</td>

<td>94</td>

</tr>

<tr bgcolor="#D4E4F3">

<td>Y_2019</td>

<td>76</td>

</tr>

</table>

</td>

</tr>

</table>

</body>

</html>

]]></description>
      <styleUrl>#LineStyle10</styleUrl>
      <MultiGeometry>
        <LineString>
          <extrude>0</extrude>
          <tessellate>1</tessellate><altitudeMode>clampToGround</altitudeMode>
          <coordinates> -0.2220958555462569,39.18007680060521,0 -0.2226969824333907,39.18205019196631,0</coordinates>
        </LineString>
      </MultiGeometry>
    </Placemark>
    <Placemark id="ID_10040">
      <name>Los Olivos</name>
      <Snippet></Snippet>
      <description><![CDATA[<html xmlns:fo="http://www.w3.org/1999/XSL/Format" xmlns:msxsl="urn:schemas-microsoft-com:xslt">

<head>

<META http-equiv="Content-Type" content="text/html">

<meta http-equiv="content-type" content="text/html; charset=UTF-8">

</head>

<body style="margin:0px 0px 0px 0px;overflow:auto;background:#FFFFFF;">

<table style="font-family:Arial,Verdana,Times;font-size:12px;text-align:left;width:100%;border-collapse:collapse;padding:3px 3px 3px 3px">

<tr style="text-align:center;font-weight:bold;background:#9CBCE2">

<td>Los Olivos</td>

</tr>

<tr>

<td>

<table style="font-family:Arial,Verdana,Times;font-size:12px;text-align:left;width:100%;border-spacing:0px; padding:3px 3px 3px 3px">

<tr>

<td>ID_Transecto</td>

<td>42</td>

</tr>

<tr bgcolor="#D4E4F3">

<td>Name</td>

<td>Los Olivos</td>

</tr>

<tr>

<td>Y_1956</td>

<td>14</td>

</tr>

<tr bgcolor="#D4E4F3">

<td>Y_1977</td>

<td>8</td>

</tr>

<tr>

<td>Y_1985</td>

<td>73</td>

</tr>

<tr bgcolor="#D4E4F3">

<td>Y_1989</td>

<td>82</td>

</tr>

<tr>

<td>Y_2000</td>

<td>34</td>

</tr>

<tr bgcolor="#D4E4F3">

<td>Y_2004</td>

<td>35</td>

</tr>

<tr>

<td>Y_2006</td>

<td>44</td>

</tr>

<tr bgcolor="#D4E4F3">

<td>Y_2008</td>

<td>37</td>

</tr>

<tr>

<td>Y_2010</td>

<td>39</td>

</tr>

<tr bgcolor="#D4E4F3">

<td>Y_2012</td>

<td>28</td>

</tr>

<tr>

<td>Y_2015</td>

<td>43</td>

</tr>

<tr bgcolor="#D4E4F3">

<td>Y_2017</td>

<td>61</td>

</tr>

<tr>

<td>Y_2018</td>

<td>35</td>

</tr>

<tr bgcolor="#D4E4F3">

<td>Y_2019</td>

<td>25</td>

</tr>

</table>

</td>

</tr>

</table>

</body>

</html>

]]></description>
      <styleUrl>#LineStyle10</styleUrl>
      <MultiGeometry>
        <LineString>
          <extrude>0</extrude>
          <tessellate>1</tessellate><altitudeMode>clampToGround</altitudeMode>
          <coordinates> -0.2214576141387124,39.18003037184284,0 -0.2205393134009932,39.18145238006728,0</coordinates>
        </LineString>
      </MultiGeometry>
    </Placemark>
    <Placemark id="ID_10041">
      <name>Los Olivos</name>
      <Snippet></Snippet>
      <description><![CDATA[<html xmlns:fo="http://www.w3.org/1999/XSL/Format" xmlns:msxsl="urn:schemas-microsoft-com:xslt">

<head>

<META http-equiv="Content-Type" content="text/html">

<meta http-equiv="content-type" content="text/html; charset=UTF-8">

</head>

<body style="margin:0px 0px 0px 0px;overflow:auto;background:#FFFFFF;">

<table style="font-family:Arial,Verdana,Times;font-size:12px;text-align:left;width:100%;border-collapse:collapse;padding:3px 3px 3px 3px">

<tr style="text-align:center;font-weight:bold;background:#9CBCE2">

<td>Los Olivos</td>

</tr>

<tr>

<td>

<table style="font-family:Arial,Verdana,Times;font-size:12px;text-align:left;width:100%;border-spacing:0px; padding:3px 3px 3px 3px">

<tr>

<td>ID_Transecto</td>

<td>42</td>

</tr>

<tr bgcolor="#D4E4F3">

<td>Name</td>

<td>Los Olivos</td>

</tr>

<tr>

<td>Y_1956</td>

<td>14</td>

</tr>

<tr bgcolor="#D4E4F3">

<td>Y_1977</td>

<td>8</td>

</tr>

<tr>

<td>Y_1985</td>

<td>73</td>

</tr>

<tr bgcolor="#D4E4F3">

<td>Y_1989</td>

<td>82</td>

</tr>

<tr>

<td>Y_2000</td>

<td>34</td>

</tr>

<tr bgcolor="#D4E4F3">

<td>Y_2004</td>

<td>35</td>

</tr>

<tr>

<td>Y_2006</td>

<td>44</td>

</tr>

<tr bgcolor="#D4E4F3">

<td>Y_2008</td>

<td>37</td>

</tr>

<tr>

<td>Y_2010</td>

<td>39</td>

</tr>

<tr bgcolor="#D4E4F3">

<td>Y_2012</td>

<td>28</td>

</tr>

<tr>

<td>Y_2015</td>

<td>43</td>

</tr>

<tr bgcolor="#D4E4F3">

<td>Y_2017</td>

<td>61</td>

</tr>

<tr>

<td>Y_2018</td>

<td>35</td>

</tr>

<tr bgcolor="#D4E4F3">

<td>Y_2019</td>

<td>25</td>

</tr>

</table>

</td>

</tr>

</table>

</body>

</html>

]]></description>
      <styleUrl>#LineStyle10</styleUrl>
      <MultiGeometry>
        <LineString>
          <extrude>0</extrude>
          <tessellate>1</tessellate><altitudeMode>clampToGround</altitudeMode>
          <coordinates> -0.2217998011372949,39.18007988183556,0 -0.2215948562837725,39.18204557273834,0</coordinates>
        </LineString>
      </MultiGeometry>
    </Placemark>
  </Folder>
  <Folder id="FeatureLayer2">
    <name>Linea_Referencia</name>
    <Snippet></Snippet>
    <Placemark id="ID_20000">
      <name>5566.58007</name>
      <Snippet></Snippet>
      <description><![CDATA[<html xmlns:fo="http://www.w3.org/1999/XSL/Format" xmlns:msxsl="urn:schemas-microsoft-com:xslt">

<head>

<META http-equiv="Content-Type" content="text/html">

<meta http-equiv="content-type" content="text/html; charset=UTF-8">

</head>

<body style="margin:0px 0px 0px 0px;overflow:auto;background:#FFFFFF;">

<table style="font-family:Arial,Verdana,Times;font-size:12px;text-align:left;width:100%;border-collapse:collapse;padding:3px 3px 3px 3px">

<tr style="text-align:center;font-weight:bold;background:#9CBCE2">

<td>5566.58007</td>

</tr>

<tr>

<td>

<table style="font-family:Arial,Verdana,Times;font-size:12px;text-align:left;width:100%;border-spacing:0px; padding:3px 3px 3px 3px">

<tr>

<td>SHAPE</td>

<td>Polyline</td>

</tr>

<tr bgcolor="#D4E4F3">

<td>SHAPE_Length</td>

<td>5566.58007</td>

</tr>

</table>

</td>

</tr>

</table>

</body>

</html>

]]></description>
      <styleUrl>#LineStyle20</styleUrl>
      <MultiGeometry>
        <LineString>
          <extrude>0</extrude>
          <tessellate>1</tessellate><altitudeMode>clampToGround</altitudeMode>
          <coordinates> -0.2208544932077585,39.18034045450371,0 -0.2206487615116589,39.18058725379753,0 -0.2205614838710016,39.18068814231209,0 -0.2205378692853114,39.18074298163602,0 -0.2204863637132943,39.18083757364715,0 -0.2203891096881417,39.18097397845444,0 -0.22023585699483,39.18117912391283,0 -0.2203165547400306,39.18122967612658,0 -0.2205393134009932,39.18145238006728,0 -0.2207005194617721,39.18160496546691,0 -0.2208685868177482,39.18172339044697,0 -0.2211747502941838,39.18192806164558,0 -0.2213140634403984,39.18203006745673,0 -0.2214309397591364,39.18204858895919,0 -0.2217693036721204,39.18204236162611,0 -0.2220832379073465,39.18204985210798,0 -0.2225793741809049,39.18205024688137,0 -0.2226969824333907,39.18205019196631,0 -0.2232329304161213,39.18197287399983,0 -0.2234205476589381,39.18192157226053,0 -0.2235565904718633,39.1818733304315,0 -0.2239736188643375,39.18173596655098,0 -0.2242958915123148,39.1816249455827,0 -0.22445014345422,39.18153423179247,0 -0.2246453303276086,39.18133723060124,0 -0.2248178100663377,39.18115684984144,0 -0.2250026906647276,39.18098820569984,0 -0.2251315008707463,39.18093692927468,0 -0.2252753151895283,39.18092462432269,0 -0.2253752180901802,39.18095417869018,0 -0.225470663650307,39.18100364819243,0 -0.2255184334247266,39.18105055274709,0 -0.225652074709157,39.18129686557342,0 -0.2257499745776776,39.18147081830006,0 -0.2257956835891789,39.1815233943094,0 -0.2259093008817248,39.18162478243802,0 -0.2261112841384279,39.18167535999618,0 -0.2263732517048077,39.18169590247874,0 -0.2264059777494672,39.18151791164249,0 -0.2264994284902394,39.18153634569239,0 -0.2265670188822054,39.18154653671932,0 -0.2270933894652662,39.18161914071182,0 -0.2276194242326338,39.18170031624061,0 -0.2279720067055196,39.1817530457857,0 -0.2280984529909505,39.18162162041352,0 -0.2282293005494259,39.18147170704395,0 -0.2283307571851186,39.18136828985354,0 -0.2284843860530308,39.18129328719547,0 -0.2286782361890156,39.18122353262896,0 -0.2288819371896249,39.18113685017315,0 -0.229137621330294,39.18098990678666,0 -0.2292795769214173,39.18088459218031,0 -0.2294117348715885,39.18079477565146,0 -0.2295142775124083,39.18075717095152,0 -0.229548873759455,39.18067170750048,0 -0.2295116062365371,39.18017026015166,0 -0.2300316069087233,39.18022553807386,0 -0.2300374390141637,39.18017061512094,0 -0.2305193794818446,39.18022021697976,0 -0.23070229096128,39.18024172955285,0 -0.2307801707845293,39.18025502318553,0 -0.2308126922364977,39.18026914519516,0 -0.2308313776835017,39.18029247228822,0 -0.2308292085273983,39.18034772023992,0 -0.230837353312334,39.18038986585225,0 -0.2308631577656756,39.1804190829254,0 -0.2309528555201151,39.1804746094129,0 -0.2309088594655933,39.18050311959624,0 -0.2309989687452396,39.18054816763516,0 -0.2311897644874197,39.18061849357793,0 -0.2314280040351328,39.18066610970189,0 -0.2317175458184885,39.18068634262475,0 -0.2317151452996023,39.18065386869948,0 -0.2321576571309918,39.18067034734997,0 -0.2324317319568619,39.18066327589978,0 -0.2326593572994954,39.18064580350313,0 -0.2328152156880528,39.1806309151145,0 -0.2328361674006807,39.18061210600087,0 -0.2328418773361873,39.18058363832771,0 -0.2330186244620559,39.18057496677673,0 -0.2330574435615904,39.1806159349091,0 -0.2332101548113128,39.18061098283238,0 -0.2335526393895364,39.18056977964275,0 -0.2337992456694996,39.18051342566399,0 -0.234026904706102,39.18047163895496,0 -0.2340385484750552,39.18052030257127,0 -0.2342548794162259,39.18047061843919,0 -0.2345725652490207,39.18037447673205,0 -0.2348622101994206,39.18025144859975,0 -0.2350652484845724,39.18015019899804,0 -0.2352883703512633,39.18000532894794,0 -0.2353179416044284,39.1800322507296,0 -0.2354144894439552,39.17997821025723,0 -0.2357865426601058,39.17973724000777,0 -0.2361754448629652,39.17944136887695,0 -0.2363164024487854,39.17931949489046,0 -0.2365095661281659,39.17919655621493,0 -0.236706348801738,39.17905940139573,0 -0.2369177013251144,39.17886300051236,0 -0.2371673544700887,39.17862698760522,0 -0.2374566720400882,39.17834781731863,0 -0.2377452034130448,39.17804955928408,0 -0.2378498119771013,39.17794334703955,0 -0.2382990012322444,39.1774682196631,0 -0.2384120115405814,39.17735076569461,0 -0.2383364194819245,39.17731035866153,0 -0.2385138689503974,39.17709575070654,0 -0.2386201040973942,39.17691663803783,0 -0.2386143272243219,39.17687645625167,0 -0.2386673707157181,39.17674184751326,0 -0.2387027540969741,39.17672981464086,0 -0.2387581823651563,39.17662815679189,0 -0.2387858870372702,39.17662452372404,0 -0.2388878992678575,39.17641241625599,0 -0.2389462259508872,39.17628365333682,0 -0.2390974215375129,39.17603552837079,0 -0.2392195696081245,39.17582532863997,0 -0.2392800748439921,39.17564084005447,0 -0.2392819760812383,39.17559225930903,0 -0.2393157003341773,39.17552870163704,0 -0.2393421923357592,39.17546211124045,0 -0.2393737357416919,39.17545427807451,0 -0.2394226488839361,39.17537820848583,0 -0.2394809636011759,39.17529664108093,0 -0.2396016642436621,39.17507639493269,0 -0.2396599971072008,39.17490043654117,0 -0.2396922856276932,39.17477963694833,0 -0.2397381974029097,39.1746863340012,0 -0.2398072544893928,39.17456497536175,0 -0.2398699759318421,39.17441772430538,0 -0.2398629771544657,39.1743617812588,0 -0.2399189048293841,39.17424726352515,0 -0.2399585171535069,39.17422102877435,0 -0.239969092577524,39.17418552560741,0 -0.2400050611914804,39.1740176170189,0 -0.240052927355882,39.17387430378938,0 -0.2401167655544755,39.17369847560622,0 -0.2401970121250949,39.17352589662703,0 -0.240330175611625,39.17326876052205,0 -0.2404309097628769,39.17299512425268,0 -0.2403760075750908,39.17298953212772,0 -0.2404252705631718,39.17281049796078,0 -0.2404748886211497,39.1728102441445,0 -0.2405128578664053,39.17263809269209,0 -0.240562789729196,39.17244191133566,0 -0.240647943494947,39.17219078835312,0 -0.2407324260202287,39.17195681145426,0 -0.2407569293472236,39.17180007313938,0 -0.2407517831080312,39.17164978264351,0 -0.2407318700446383,39.17164215946253,0 -0.2407739561242192,39.17145866495907,0 -0.2407919770779635,39.17146767301903,0 -0.2408259760951264,39.17139696913114,0 -0.2409311372503603,39.17091606173641,0 -0.2409800771933705,39.17065120923934,0 -0.2410047875305807,39.17058314644233,0 -0.2410757704107132,39.17022442386903,0 -0.2410866973065728,39.17008595555641,0 -0.2410806563365528,39.16995852659954,0 -0.241138229326936,39.16994272860237,0 -0.2410972644922932,39.16976870666634,0 -0.241099012763157,39.16963002087297,0 -0.2411153425320539,39.16944734564644,0 -0.2411563349917829,39.16918993169299,0 -0.2412043461545738,39.16898011799609,0 -0.2412703389254383,39.1687802653687,0 -0.2412050309216698,39.16876680015326,0 -0.2412890076851039,39.16857690776838,0 -0.2413429959745692,39.16837081125049,0 -0.2413500123301632,39.16826967346585,0 -0.2413609333527025,39.16799033265627,0 -0.2413775281816937,39.16787917228251,0 -0.241357985676204,39.1678777552629,0 -0.2413755859659579,39.16774087558853,0 -0.2413935092679716,39.16774191010303,0 -0.2413996267358885,39.16752276148752,0 -0.2414031485950945,39.16730736487018,0 -0.2414212055007892,39.16709612697636,0 -0.2414428552423643,39.16685041128496,0 -0.2414437588713987,39.16670979821631,0 -0.241415275066729,39.16657683217081,0 -0.2413595841953339,39.16643487927485,0 -0.2413674705865093,39.16638977712684,0 -0.2413917178886472,39.16635698053101,0 -0.2414243053287476,39.16634583455878,0 -0.2414240388285272,39.1662743195678,0 -0.2414502271221735,39.16627017241126,0 -0.2414581611369225,39.16622387949697,0 -0.2414797150075196,39.16622081443328,0 -0.2415061182916499,39.16570204768309,0 -0.2415187575651072,39.16550402907062,0 -0.2415365723896291,39.16517360391509,0 -0.2415515155781476,39.16494799043228,0 -0.2415554197349268,39.16487943366954,0 -0.2415222008819351,39.16485195048833,0 -0.2415215404892755,39.1648061692811,0 -0.2415562321998126,39.16467064752948,0 -0.2415864392075075,39.16452453128755,0 -0.2415843527833714,39.16435858168656,0 -0.2415579369810567,39.16421970519604,0 -0.2415147209241683,39.16410331441113,0 -0.2415802062576075,39.16408865670433,0 -0.2415687193910623,39.16403785148788,0 -0.2415598717600067,39.16395087831389,0 -0.2415740162091565,39.1638396588917,0 -0.241606329788982,39.16373363829953,0 -0.2416215549527372,39.16359479503424,0 -0.241627335510995,39.16338421933801,0 -0.2416187413952413,39.1631027475755,0 -0.2415928843171186,39.16294958256714,0 -0.2416762385688314,39.16294774350635,0 -0.2416684694238538,39.1628331446371,0 -0.2415931031703113,39.16250527967655,0 -0.2415831759252873,39.16244593035161,0 -0.2415603623287398,39.16227758252661,0 -0.2415355576996398,39.16203481846324,0 -0.2415118809815832,39.16170054904197,0 -0.241476117908672,39.16136218070066,0 -0.2414156937792276,39.16093407894851,0 -0.2413660960670273,39.16051100206917,0 -0.2413354836321606,39.16030719208109,0 -0.2412710788284595,39.16030995642402,0 -0.2412545432582913,39.16007501604972,0 -0.2412694169591348,39.15992948968673,0 -0.2412721128867824,39.15976651363277,0 -0.2412683376223269,39.15972208832921,0 -0.2412101182933885,39.1596606417647,0 -0.2411965598320405,39.1595845208457,0 -0.2411940215055818,39.15946146568024,0 -0.2411284766203261,39.15930545399324,0 -0.2410694901685834,39.15916962009643,0 -0.2410433646533627,39.15908605009987,0 -0.2410236380880234,39.15897974980412,0 -0.2410022372096165,39.15891631508192,0 -0.2409801175127044,39.15882425982814,0 -0.2410350801688259,39.15873403081062,0 -0.2411363082402405,39.15868208148819,0 -0.2412505431010968,39.15867334635504,0 -0.2413536475328162,39.15871440401585,0 -0.241398867270505,39.15868544109225,0 -0.2413591201469178,39.15857437650762,0 -0.2413058705739599,39.15838576169379,0 -0.2412807583235104,39.15822927726903,0 -0.2412638726057223,39.15809730114767,0 -0.2411982005917455,39.15803853837856,0 -0.2411891517470565,39.15794107120337,0 -0.2412011685879968,39.15791561273362,0 -0.2411901163105278,39.15782238997205,0 -0.2412034652370724,39.15780983418438,0 -0.2411555553590966,39.15762563676826,0 -0.2411233259554858,39.15746326299135,0 -0.2411141085317176,39.15737008278725,0 -0.2410891409032263,39.15735089945391,0 -0.241069854298377,39.15728036349876,0 -0.2410698614025562,39.15723316743569,0 -0.2410925545977474,39.15721654296003,0 -0.2410274026761512,39.15705052883039,0 -0.2409940556258365,39.15691673293875,0 -0.2409774023061938,39.15673184533433,0 -0.240952513392881,39.15656964541049,0 -0.2409071583737523,39.15641411101483,0 -0.2408588534911174,39.15627137963929,0 -0.2409346826827881,39.15621120165888,0 -0.2408356568766227,39.15529830806798,0 -0.2407291854262182,39.15457592918337,0 -0.2406909099505276,39.15398864937325,0 -0.240722344550446,39.15334104662539,0 -0.2407261183432912,39.1529311516884,0 -0.2406757433620282,39.1526534562412,0 -0.2406481620802516,39.15241920702365,0 -0.2406830550973432,39.15215306698192,0 -0.2352682986985346,39.15142873788135,0</coordinates>
        </LineString>
      </MultiGeometry>
    </Placemark>
  </Folder>
</Document>
</kml>
